# Supplementary material for: Impact of frailty on 30-day and 1-year mortality in hospitalised elderly patients with community-acquired pneumonia: a prospective observational study
Source: PubMed Central journal article supplement — BMJ Open. 2020 Oct 31;10(10):e038370. doi: 10.1136/bmjopen-2020-038370 (PMC7783614; doi:10.1136/bmjopen-2020-038370), 2020-10-31
Supplement: bmjopen-2020-038370.draft_revisions.pdf [file bmjopen-2020-038370.draft_revisions.pdf]

# BMJ Open

BMJ Open is committed to open peer review. As part of this commitment we make the peer review history of every article we publish publicly available.

When an article is published we post the peer reviewers' comments and the authors' responses online. We also post the versions of the paper that were used during peer review. These are the versions that the peer review comments apply to.

The versions of the paper that follow are the versions that were submitted during the peer review process. They are not the versions of record or the final published versions. They should not be cited or distributed as the published version of this manuscript.

BMJ Open is an open access journal and the full, final, typeset and author-corrected version of record of the manuscript is available on our site with no access controls, subscription charges or pay-per-view fees (<http://bmjopen.bmj.com>).

If you have any questions on BMJ Open's open peer review process please email [info.bmjopen@bmj.com](mailto:info.bmjopen@bmj.com)

# BMJ Open

## The impact of frailty on short- and long-term mortality in hospitalized elderly patients with community-acquired pneumonia: a prospective observational study

|                               |                                                                                                                                                                                                                                                                                                                                                                                                                                                                                                      |
|-------------------------------|------------------------------------------------------------------------------------------------------------------------------------------------------------------------------------------------------------------------------------------------------------------------------------------------------------------------------------------------------------------------------------------------------------------------------------------------------------------------------------------------------|
| Journal:                      | <i>BMJ Open</i>                                                                                                                                                                                                                                                                                                                                                                                                                                                                                      |
| Manuscript ID                 | bmjopen-2020-038370                                                                                                                                                                                                                                                                                                                                                                                                                                                                                  |
| Article Type:                 | Original research                                                                                                                                                                                                                                                                                                                                                                                                                                                                                    |
| Date Submitted by the Author: | 10-Mar-2020                                                                                                                                                                                                                                                                                                                                                                                                                                                                                          |
| Complete List of Authors:     | luo, jia; Capital Medical University Affiliated Beijing Friendship Hospital, Geriatric department;<br>Tang, Wen; Capital Medical University Affiliated Beijing Friendship Hospital, Department of Internal Medicine and Geriatrics<br>Ying, Sun; Capital Medical University Affiliated Beijing Friendship Hospital, Department of Internal Medicine and Geriatrics<br>Jiang, Chun; Capital Medical University Affiliated Beijing Friendship Hospital, Department of Internal Medicine and Geriatrics |
| Keywords:                     | GERIATRIC MEDICINE, INTERNAL MEDICINE, Respiratory infections < THORACIC MEDICINE                                                                                                                                                                                                                                                                                                                                                                                                                    |
|                               |                                                                                                                                                                                                                                                                                                                                                                                                                                                                                                      |

SCHOLARONE™  
Manuscripts

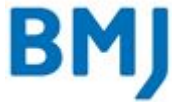

I, the Submitting Author has the right to grant and does grant on behalf of all authors of the Work (as defined in the below author licence), an exclusive licence and/or a non-exclusive licence for contributions from authors who are: i) UK Crown employees; ii) where BMJ has agreed a CC-BY licence shall apply, and/or iii) in accordance with the terms applicable for US Federal Government officers or employees acting as part of their official duties; on a worldwide, perpetual, irrevocable, royalty-free basis to BMJ Publishing Group Ltd ("BMJ") its licensees and where the relevant Journal is co-owned by BMJ to the co-owners of the Journal, to publish the Work in this journal and any other BMJ products and to exploit all rights, as set out in our [licence](#).

The Submitting Author accepts and understands that any supply made under these terms is made by BMJ to the Submitting Author unless you are acting as an employee on behalf of your employer or a postgraduate student of an affiliated institution which is paying any applicable article publishing charge ("APC") for Open Access articles. Where the Submitting Author wishes to make the Work available on an Open Access basis (and intends to pay the relevant APC), the terms of reuse of such Open Access shall be governed by a Creative Commons licence – details of these licences and which [Creative Commons](#) licence will apply to this Work are set out in our licence referred to above.

Other than as permitted in any relevant BMJ Author's Self Archiving Policies, I confirm this Work has not been accepted for publication elsewhere, is not being considered for publication elsewhere and does not duplicate material already published. I confirm all authors consent to publication of this Work and authorise the granting of this licence.

1  
2  
3  
4 The impact of frailty on short- and long-term mortality in hospitalized elderly patients  
5  
6 with community-acquired pneumonia: a prospective observational study  
7  
8  
9

10 Jia Luo, MD; Wen Tang\*, MD, PhD; Ying Sun, MD, PhD; Chun-Yan Jiang, MD, PhD.

11  
12  
13 Department of Internal Medicine and Geriatrics, Beijing Friendship Hospital, Capital  
14  
15  
16 Medical University, Beijing, China.

17  
18  
19 **Short title:** Impact of frailty on community-acquired pneumonia  
20  
21

22  
23 **Word count:** Abstract—297; Manuscript--2945  
24  
25

26  
27 **Corresponding Author:**  
28

29  
30 Wen Tang, MD, PhD. Department of Internal Medicine and Geriatrics, Beijing  
31  
32 Friendship Hospital, Capital Medical University. Postal address: No. 95, Yong'an Road,  
33  
34 Xicheng District, Beijing 100050, PR China. Email: twybx@163.com. Tel: + (86  
35  
36 10) 63137642 / +86 15810683607. Fax: + (86 10) 63138795.  
37  
38  
39  
40  
41  
42  
43  
44  
45  
46  
47  
48  
49  
50  
51  
52  
53  
54  
55  
56  
57  
58  
59  
60

## Abstract

**Objectives:** This study aimed to examine the impact of frailty on short- and long-term mortality among elderly patients with community-acquired pneumonia (CAP). The major hypothesis was that frailty, a clinical state of increased vulnerability, is a good predictor of prognosis in elderly CAP patients.

**Design:** Prospective, observational, follow-up cohort study.

**Setting:** One 2000-bed tertiary care hospital in Beijing, China.

**Participants:** Consecutive CAP patients aged  $\geq 65$  years that admitted to the geriatric department between September 2017 and February 2019.

**Main outcome measures:** The primary outcomes were all-cause mortality at 30 days and 1 year after admission to the hospital. Multivariable Cox regression models were used to examine the independent association between frailty (defined by Fried Frailty Phenotype) and 30-day and 1-year mortality of pneumonia.

**Results:** The cohort included 256 patients, with a median age of 86 years (IQR: 81, 90), 66.8% (171/256) of the patients were frail. All-cause mortality was 5.5% (14/256) at 30 days and 16.8% (43/256) at 1 year. A higher percentage of patients in the frail group than in the non-frail group was classified as severe CAP (28.65% vs 9.41%,  $P < 0.001$ ). Frailty was independently associated with an increased risk of 1-year mortality (multivariable-adjusted HR 2.70, 95% CI 1.69-4.39) after adjustment for age, sex, disability, malnutrition, comorbidities, and the severity of CAP. The 30-day

1  
2  
3  
4 mortality did not differ between patients with and without frailty by multivariable Cox  
5  
6 regression analysis (P=0.108). Severe CAP was associated with increased risks of 30-  
7  
8 day and 1-year mortality (multivariable-adjusted HR 30.60, 95% CI 3.77-248.06 and  
9  
10 HR 7.68; 95% CI: 3.79-15.58, respectively).  
11  
12  
13

14  
15 **Conclusions:** Frail patients are prone to develop severe CAP, and frailty is strongly  
16  
17 related to prognosis of 1-year mortality. Our findings suggest that frailty is strongly  
18  
19 related to prognosis and should be considered in routine clinical practice and post-  
20  
21 discharge management.  
22  
23  
24

25  
26 **Key words:** Community-acquired pneumonia; Frailty; Elderly; Prognosis.  
27  
28

### 29 30 **Strengths and limitations of this study**

- 31  
32  
33 1. This study addresses the paucity of knowledge on frailty in elderly patients with  
34  
35 community-acquired pneumonia.  
36  
37  
38  
39 2. This study summarized and analyzed well known prognosis variables (such as  
40  
41 age, disability, malnutrition, comorbidities, the severity of CAP) and frailty, and  
42  
43 proved the significance of frailty to prognosis by multivariate analysis.  
44  
45  
46  
47  
48 3. Frailty defined by the Fried Frailty Phenotype, which is well validated and simple to  
49  
50 use.  
51  
52  
53  
54 4. This a single institution and a relatively small sample prospective study, lack of  
55  
56 comparison with data from other hospitals and regions.  
57  
58  
59  
60

## Introduction

Community-acquired pneumonia (CAP) is the leading cause of infectious disease in the elderly and is associated with high rates of mortality, morbidity and high costs worldwide.<sup>[1, 2, 3, 4]</sup> In the United States, the incidence of CAP in adults between 65 and 79 years old is 63 cases per 10,000 adults and increases to 164.3 cases per 10,000 adults in the over-80 age group.<sup>[5]</sup> In China, the incidence of mortality due to pneumonia is 23.55 cases per 100,000 adults aged between 65 and 69 years old and nearly 36 times greater in persons over 85 years.

Well known risk factors for mortality, such as age, functional status, comorbidities, and others, have already been incorporated into the assessment of the severity of CAP,<sup>[6,7,8,9]</sup> but increasing mortality in elderly CAP patients indicates the need for the identification of novel, ideally modifiable, risk factors for poor outcomes. Particular attention has recently been directed to the concept of the “frail elderly patient”.<sup>[4]</sup> Although frailty has been considered synonymous with disability, comorbidity or advanced old age, it is defined as a cumulative decline and loss of physiological reserves in multiple organs and systems and causes increased vulnerability to adverse outcomes.<sup>[10]</sup> Frailty has been confirmed to be an independent risk factor for mortality in patients with acute and chronic diseases.<sup>[11,12]</sup> A European multicenter study that included 5021 patients assessed the impact of frailty on intensive care unit (ICU) admission and 30-day mortality in elderly patients. The results indicated that frailty (measured by the Clinical Frailty Scale) was found in 43% of patients and was independently related to 30-day survival (hazard ratio (HR) 1.54; 95% confidence

1  
2  
3  
4 interval (CI) 1.38-1.73 for frail versus non-frail patients).<sup>[13]</sup> However, few studies have  
5  
6 investigated the association of frailty with the prognosis of CAP.<sup>[14,15]</sup> Therefore, we  
7  
8 hypothesized that frailty was related to the prognosis of elderly CAP patients, and it  
9  
10 may have significant predictive value. The objective of this study was to prospectively  
11  
12 evaluate the impact of frailty on the outcome of elderly patients with CAP. This  
13  
14 information will be helpful for the early stratification of high-risk patients and the  
15  
16 implementation of the hierarchical management of modifiable factors to improve the  
17  
18 prognosis of elderly patients with CAP.  
19  
20  
21  
22  
23  
24

## 25 Methods

### 26 1. Study design

27  
28  
29 We prospectively enrolled consecutive elderly patients (age  $\geq 65$  years) diagnosed  
30  
31 with CAP in the geriatric department from September 2017 to February 2019. The  
32  
33 exclusion criteria were as follows: 1) Complicated with acute myocardial infarction,  
34  
35 acute cerebrovascular disease, gastrointestinal bleeding, or acute renal failure. 2)  
36  
37 Surgical history within 3 months. 3) Terminal stage of a malignant tumor.  
38  
39  
40  
41  
42  
43  
44  
45

46 CAP was defined as pneumonia acquired outside the hospital by an immune-  
47  
48 competent individual. The specific criteria for the diagnosis of CAP were as follows: (1)  
49  
50 community onset and (2) the presence of new infiltrate on chest X-ray or a computed  
51  
52 tomography scan together with at least one of the following: (i) new or increased cough  
53  
54 (productive, nonproductive or with a change in sputum characteristics) with or without  
55  
56 dyspnea, chest pain or hemoptysis; (ii) fever; (iii) rales and/or signs of consolidation;  
57  
58  
59  
60



1  
2  
3  
4 (iv) peripheral WBC count > 10,000 cells mm<sup>-3</sup> or < 4000 cells mm<sup>-3</sup>, with or without a  
5  
6 leftward shift toward immature forms. The exclusion of tuberculosis, lung cancer,  
7  
8 noninfectious pulmonary interstitial disease, pulmonary edema, atelectasis, pulmonary  
9  
10 embolism, pulmonary eosinophilic infiltration, and pulmonary vasculitis can establish a  
11  
12 clinical diagnosis.<sup>[16]</sup>  
13  
14  
15  
16

## 17 18 2. Baseline assessment

19  
20  
21 The following parameters were evaluated within 24 hours of admission: age, sex,  
22  
23 body mass index (BMI), smoking history, procalcitonin (PCT), high-sensitivity C-  
24  
25 reactive protein (hs-CRP), white blood count (WBC), hemoglobin (HGB), alanine  
26  
27 aminotransferase (ALT), albumin (ALB), prealbumin (PA), serum creatinine (Scr) and  
28  
29 blood urea nitrogen (BUN).  
30  
31  
32  
33  
34

## 35 36 3. Severity of CAP

37  
38 The diagnostic criteria for severe CAP (SCAP) from the Infectious Diseases Society  
39  
40 of America (IDSA) / American Thoracic Society (ATS) were used.<sup>[17]</sup> For the diagnosis  
41  
42 of SCAP, at least 1 major or 3 minor criteria must be satisfied. The major criteria are  
43  
44 the need for mechanical ventilation or septic shock. The minor criteria are as follows:  
45  
46 respiratory rate >130 breaths/min; arterial oxygen pressure/fraction of inspired oxygen  
47  
48 (PaO<sub>2</sub>/FiO<sub>2</sub>) ratio <250; multilobar infiltrate; confusion; blood urea nitrogen level >120  
49  
50 mg/dL; leukopenia resulting from infection; thrombocytopenia; hypothermia; or  
51  
52 hypotension requiring aggressive fluid resuscitation.  
53  
54  
55  
56  
57  
58  
59  
60

## 61 4. Frailty assessment

1  
2  
3  
4 Frailty was assessed by the Fried Frailty Phenotype (FFP) (unintentional weight  
5  
6 loss, self-reported exhaustion, weakness, slow walking speed, and low physical  
7  
8 activity)<sup>[18]</sup> within 24 hours of admission. Each construct is assigned “1” if present or  
9  
10 “0” if absent, and the score is standardized for sex, height, and weight. The FFP ranges  
11  
12 from 0–5; consistent with established definitions, we defined frailty as the FFP score  
13  
14 of  $\geq 3$ , non-frail as the FFP score of 0-2.  
15  
16  
17  
18  
19

## 20 5. Covariates

21  
22  
23 Comorbidity was evaluated with the Charlson Comorbidity Index (CCI).<sup>[19]</sup> The CCI  
24  
25 is the sum of the weighted measures of the following 17 chronic medical conditions:  
26  
27 ischemic heart disease, congestive heart failure, cerebrovascular accident, peripheral  
28  
29 vascular diseases, chronic lung diseases, diabetes, dementia, connective tissue  
30  
31 diseases, renal diseases, liver diseases, hemiplegia, solid or hematological  
32  
33 malignancy, and acquired immunodeficiency disease. A score of 1, 2, 3 or 6 is  
34  
35 assigned to each disease, depending on the severity.  
36  
37  
38  
39  
40  
41  
42

43 Functional status assessments were carried out with the Barthel Index (BI) to  
44  
45 evaluate the activities of daily living.  
46  
47  
48

49 The nutritional status assessment was conducted by a professional with the unified  
50  
51 Mini Nutritional Assessment-Short Form (MNA-SF) questionnaire.<sup>[20]</sup> The  
52  
53 questionnaire consists of BMI, weight loss in the past 3 months, dietary changes,  
54  
55 stress or acute illness, activity and neuropsychiatric diseases. The total score is 14  
56  
57 points. Scores of 0-7 indicated malnutrition.  
58  
59  
60

## 5. Follow-up and outcomes

All patients were followed for 1 year after admission. The primary outcomes were all-cause mortality at 30 days and 1 year after admission to the hospital.

## 6. Statistical analysis

Statistical analyses were performed with IBM SPSS software 23.0 (Chicago, USA). Continuous variables were expressed as the means  $\pm$  standard deviation (SD) or interquartile range (IQR) and compared using Student's t-test or the Mann–Whitney U test. Categorical variables were compared using the chi-squared test or Fisher's exact test. Univariable and multivariable Cox proportional hazards regression models were used to calculate hazard ratio (HR) with 95% confidence interval (CI) for the analysis of the association between frailty status at baseline and 30-day and 1-year all-cause mortality. In all analyses, two-tailed p values  $< 0.05$  were considered to indicate significance.

## Patient and public involvement

The research questions and outcome measures were developed based on some most common problems that are widely recognized among elder patients. Patients or the public did not involve in the design of the study, recruitment or conduction of the study. The results of the study would be disseminated to patients once he or she requests so and aggregated data would be reported in project reports and research publications and conferences.

## Results

In total, 393 patients with CAP were admitted to our hospital during the study period, 119 patients with the concomitant diseases before admission were excluded (Figure.1), and 18 were excluded due to loss to follow-up. In total of 256 patients (range, 65-99 years) were included for the final statistical analysis. Demographic patient characteristics are shown in Table 1. The median age was 86 years ((IQR: 81, 90), and 207 (80.9%) patients were very old (age  $\geq$ 80 years). At baseline, 180 (70.3%) patients were male, 71 (27.7%) were malnourished, 171 (66.8%) were frail, and 57 (22.3%) had SCAP. All-cause mortality for the 256 patients with CAP was 5.5% at 30 days and 16.8% at 1 year.

### *The impact of frailty on the prognosis of CAP*

According to the FFP, we classified patients with scores 0-2 as the non-frail group (N=85) and patients with scores  $\geq$ 3 as the frail group (N=171). Table 2 summarizes the demographics, clinical characteristics and mortality of the CAP patients stratified by the presence or absence of frailty. Compared to the non-frail group, the frail group was more likely to be older ( $P<0.001$ ) and female (34.50% vs 20.00%,  $P=0.017$ ). In addition, compared with the non-frail group, the frail group had decreased activities abilities of daily living ( $P<0.001$ ) and increased CCI scores ( $P<0.001$ ). Both a lower MNA-SF score ( $P<0.001$ ) and nutritional indicators such as BMI ( $22.25\pm 4.40$  vs  $24.17\pm 3.80$ ,  $P=0.001$ ), ALB ( $31.50\pm 4.16$  vs  $34.38\pm 4.22$ ,  $P<0.001$ ) and PA ( $15.98\pm 5.88$  vs  $18.74\pm 6.41$ ,  $P=0.001$ ) indicated that the frail group had a worse nutritional status

1  
2  
3  
4 than the non-frail group. However, there were no significant differences between the  
5  
6 two groups with regard to PCT, hs-CRP, ALT, or Scr. A higher percentage of patients  
7  
8 in the frail group were classified as SCAP (28.65% vs 9.41%,  $P<0.001$ ), and  
9  
10 experienced higher 30-day mortality (8.19% vs 0.00%,  $P=0.015$ ) and 1-year mortality  
11  
12 (25.15% vs 0.00%,  $P<0.001$ ) compared with the non-frail group.  
13  
14  
15

### 16 17 18 *Factors associated with 30-day and 1-year mortality in patients with CAP*

19  
20  
21 Table 3 shows the significant risk factors for 30-day mortality in patients with CAP  
22  
23 identified in the Cox proportional hazards regression analyses. The univariate Cox  
24  
25 regression analyses identified several variables (SCAP, frailty, malnutrition, CCI score)  
26  
27 that were significantly associated with 30-day mortality in elderly patients with CAP. In  
28  
29 multivariable analysis, SCAP was the only independent risk factor for 30-day mortality  
30  
31 (multivariable-adjusted HR 30.60, 95% CI 3.77-248.06), while frailty was not  
32  
33 significantly associated with 30-day mortality (adjusted HR 1.83, 95% CI 0.88-3.81,  
34  
35  $P=0.108$ ).  
36  
37  
38  
39  
40  
41  
42

43 Table 4 shows the hazard ratios (95% confidence intervals) for 1-year all-cause  
44  
45 mortality. The univariate Cox regression analyses identified several variables (SCAP,  
46  
47 frailty, malnutrition, CCI score, BI, and BMI) that were significantly associated with 1-  
48  
49 year mortality in elderly patients with CAP. In multivariable analysis, SCAP (adjusted  
50  
51 HR 7.68; 95% CI: 3.79-15.58), frailty (adjusted HR 2.70, 95% CI 1.69-4.39), and CCI  
52  
53 score (adjusted HR 1.19, 95% CI 1.05-1.34) were independent risk factors for 1-year  
54  
55 mortality.  
56  
57  
58  
59  
60

## Discussion

Our study focused on evaluated the impact of frailty on short- and long-term outcomes in elderly CAP patients. The key points of this study are as follows: 1, Compared to non-frail patients, frail elderly CAP patients were more likely to develop severe pneumonia and had significantly increased short-term and long-term mortality; 2. Frailty was the independent risk factor correlated with 1-year mortality even after adjustment for age, sex, disability, malnutrition, comorbidities, and severity of CAP, but it was not the independent risk factor for the 30-day mortality.

The incidence of CAP increases with increasing age and results in higher risks of morbidity and mortality. Different independent prognostic factors related to mortality have been well described, including age, comorbidities, functional status, microbial etiology and early adequate antibiotic treatment.<sup>[8,9,21,22]</sup> Several international guidelines explicitly recommend the assessment of pneumonia severity, such as with the PSI or CURB-65, of them age and comorbidities accounted for a significant proportion of the score. An analysis of a prospective cohort study including 987 patients demonstrated that both the PSI and CURB-65 have decreased discriminative power with advancing age.<sup>[23]</sup> Significantly, however, most authors noted that in the elderly population, age *per se* is not an independent predictor of mortality.<sup>[24]</sup> Although frailty is considered to be synonymous with disability, comorbidity, or advanced age, Fried LP *et al* defined it as a diminishment in the physiological reserves for a consequence of aging and thus of the accumulation of diseases over time, which leads to a loss in the capacity of response to situations of stress.<sup>[18,25]</sup> This vulnerability

1  
2  
3  
4 results in an increased risk of adverse health outcomes including falls, disability,  
5  
6 hospitalisation, institutionalisation and death. Various conditions, including malnutrition,  
7  
8 sarcopenia, gait impairment, chronic inflammation, polypharmacy, cardiovascular  
9  
10 changes and morbidity, were found to be associated with and potentially causes of  
11  
12 frailty. [26,27,28]  
13  
14  
15

16  
17  
18 Consistent with the findings of other studies,<sup>[26]</sup> we found that the frail group of  
19  
20 patients were characterized by older age, a higher percentage of females, more  
21  
22 comorbidities, a higher incidence of malnutrition, lower functional status and lower  
23  
24 activities of daily life scores. Poor nutritional status, which in different studies  
25  
26 encompassed hypoalbuminemia, hypoproteinemia, malnourishment, or a low  
27  
28 nutritional score, was a strong predictor of mortality in CAP patients. However, in our  
29  
30 study, nutrition status was correlated with mortality by univariate analysis, but it was  
31  
32 not a significant independent risk factor after multivariate analysis. At present, it has  
33  
34 been validated that malnutrition is an important biological mechanism underlying the  
35  
36 occurrence and development of frailty.<sup>[27]</sup> Recent studies have shown that frailty and  
37  
38 malnutrition are intrinsically interrelated in terms of structure, identification tools and  
39  
40 treatment.<sup>[28,29]</sup> The treatment strategies are generally similar for frailty and malnutrition,  
41  
42 and these conditions have the potential to exacerbate each other and other comorbid  
43  
44 conditions.<sup>[26]</sup> Frailty and malnutrition can interact with each other, which leads to the  
45  
46 further deterioration of the prognosis of patients. The presence of pathological  
47  
48 conditions, including undernutrition and chronic diseases, creates a vicious cycle, with  
49  
50 a decrease in physiological reserves and the accumulation of deficits.<sup>[30]</sup> Acute  
51  
52  
53  
54  
55  
56  
57  
58  
59  
60

1  
2  
3  
4 infectious diseases, such as CAP, may result in hospitalization, disability,  
5  
6 institutionalization and death. The whole process of events is summarized in the frailty  
7  
8 cascade.<sup>[31]</sup> In our study, frailty was represented by the Fried Phenotype, which mixes  
9  
10 items of functional status (slow walking speed and low levels of physical activity) and  
11  
12 nutrition risk (unintentional weight loss). This explains why frailty, but not malnutrition  
13  
14 and disability, was associated with higher mortality in multivariate analysis. Our study  
15  
16 also confirmed that higher percentage of patients in the frail group than in the non-frail  
17  
18 group was classified as SCAP (28.65% vs 9.41%,  $P<0.001$ ), and the frail group had  
19  
20 higher 30-day (8.19% vs 0.00%,  $P=0.015$ ) and 1-year (25.15% vs 0.00%,  $P<0.001$ )  
21  
22 mortality compared with the non-frail group. Many authors have evaluated longer-term  
23  
24 patient outcomes, either at 90 days or 1 year after CAP.<sup>[32]</sup> In all cases, the mortality  
25  
26 risk was associated with the patient characteristics, i.e., underlying diseases, more  
27  
28 than with the characteristics of the acute episode.<sup>[22]</sup> Unfortunately, in these studies,  
29  
30 the basic status assessment of patients only included variables such as age,  
31  
32 malnutrition, daily living ability and comorbidities, but few of them considered about  
33  
34 frailty. We also found that frailty was independently associated with 1-year mortality  
35  
36 after adjusting for the variables mentioned earlier, which implies that frailty can  
37  
38 effectively predict the occurrence of severe pneumonia and adverse outcomes.  
39  
40  
41  
42  
43  
44  
45  
46  
47  
48  
49  
50

51 Many biomarkers of infection, such as the WBC, CRP, and PCT, have been found  
52  
53 to play roles in the early diagnosis and prognosis of CAP,<sup>[33,34]</sup> but their applicability in  
54  
55 geriatric patients has not yet been clearly established. The CRP level and the WBC  
56  
57 count, like clinical signs and symptoms, are not always reliable parameters in geriatric  
58  
59  
60



1  
2  
3  
4 patients because they may occasionally fall in the normal range (especially in the  
5  
6 elderly).<sup>[35]</sup> An analysis of a retrospective cohort of 438 CAP patients aged  $\geq 65$  years  
7  
8 did not reveal any association between CRP or WBC and mortality, or between CRP  
9  
10 or WBC and pneumonia severity.<sup>[36]</sup> Our results suggested that more patients in the  
11  
12 frail group developed severe pneumonia, both hs-CRP and PCT were higher in the  
13  
14 frail group, but there were no significant differences between the two groups. Neither  
15  
16 of the inflammatory biomarkers were associated with short- or long-term mortality in  
17  
18 elderly patients with CAP by Cox proportional hazards regression analyses.  
19  
20 Immunosenescence, defined as immunological changes that occur with age, is known  
21  
22 to be responsible for the increased susceptibility of elderly persons to infectious  
23  
24 diseases and for their limited response to vaccines.<sup>[37]</sup> Elderly patients have an  
25  
26 inadequate inflammatory response to infection, which can lead to an underestimation  
27  
28 of the severity of pneumonia and, consequently, a delay in the initiation of anti-infective  
29  
30 therapy.<sup>[38]</sup>

31  
32  
33  
34  
35  
36  
37  
38  
39  
40  
41 Our finding suggested that frail patients are prone to develop severe CAP, and frailty  
42  
43 is strongly related to prognosis of 1-year mortality. Since the clinical presentation of  
44  
45 pneumonia in the elderly may be atypical, clinicians should suspect pneumonia  
46  
47 presenting with symptoms such as falls, altered mental status, fatigue, delirium, and  
48  
49 anorexia to avoid the complications associated with delayed diagnosis and therapy.<sup>[39]</sup>  
50  
51  
52 With respect to clinical decision making and the planning of health care, it is important  
53  
54 to identify frailty in elderly CAP patients to better stratify their risk of adverse outcomes  
55  
56 and plan more specific care tailored to the needs of each patient, such as invasive  
57  
58  
59  
60

1  
2  
3  
4 diagnostic and therapeutic procedures and the final placement of the patient. In a  
5  
6 Korean study, frailty was independently associated with do-not-resuscitate orders and  
7  
8 different healthcare transitions, even after adjustment for sepsis and pneumonia  
9  
10 severity.<sup>[40]</sup> An international multidisciplinary group studying geriatric patients proposed  
11  
12 an integral geriatric assessment (IGA)<sup>[41]</sup> adapted to the emergency department (ED)  
13  
14 context to assess frailty in elderly patients.<sup>[13,42]</sup> Even if many physicians and  
15  
16 intensivists do not currently undertake the performance of a specific geriatric  
17  
18 assessment in critically ill, geriatric patients with infectious diseases, ongoing  
19  
20 demographic shifts toward the elderly population will likely force the consideration of  
21  
22 this issue in the near future. Our study suggests that frailty should be measured in  
23  
24 routine clinical practice to improve the management of elderly patients with CAP and  
25  
26 that the postdischarge management of frail patients with CAP is also important.  
27  
28  
29  
30  
31  
32  
33  
34  
35

36 Finally, we need to note that as a single-center prospective study, there is a lack of  
37  
38 comparison with data from other hospitals and regions; the numbers of patients and  
39  
40 terminal events were relatively small, and there were many restrictive factors, so the  
41  
42 results have certain limitations. This study summarized and analyzed age,  
43  
44 comorbidities, frailty and other factors, as well as various prognostic factors selected  
45  
46 by multivariate analysis. The findings are still valuable for guiding the treatment and  
47  
48 determining the prognosis of CAP in the elderly population. We expect to obtain  
49  
50 multicenter and large-sample data in future studies to confirm our research hypothesis.  
51  
52  
53  
54  
55  
56

57 Conclusions  
58  
59  
60

1  
2  
3  
4 In summary, frailty was very common in elderly patients with CAP, and frail patients  
5  
6 were more likely to suffer from severe disease and a had higher 1-year mortality rate  
7  
8 compared with non-frail patients. Our findings suggest that frailty should be considered  
9  
10 in routine clinical practice and the postdischarge management of patients with CAP.  
11  
12  
13

14  
15 **Contributors** Jia Luo, Wen Tang, Ying Sun and Chun-Yan Jiang contributed to  
16  
17 conception and design of this study. Jia Luo and Wen Tang contributed to data  
18  
19 collection. Wen Tang, Ying Sun and Chun-Yan Jiang contributed to analyses and  
20  
21 interpretation. Jia Luo and Wen Tang contributed to preparation of the manuscript. The  
22  
23 final version of the article was approved by all the authors.  
24  
25  
26  
27  
28

29 **Funding sources:** This work was supported by the Beijing Municipal Administration  
30  
31 of Hospitals Clinical Medicine Development of Special Funding Support, Code:  
32  
33 ZYLX201838, and the Beijing Friendship Hospital of Capital Medical University  
34  
35 Hospital Startup Funding, Code: yyqdk2017-37.  
36  
37  
38  
39

40 **Competing interests:** None declared.  
41  
42

43 **Ethical approval:** This study was approved by the ethics committee of Beijing  
44  
45 Friendship Hospital, Capital Medical University and conducted according to the  
46  
47 principles of the Declaration of Helsinki (project number: 2018-P2-138-01). All patients  
48  
49 provided informed consent before the commencement of the study.  
50  
51  
52  
53

54 **Data sharing statement:** Data could be shared after consultation with author, E-mail:  
55  
56 ann11121112@sina.com.  
57  
58  
59

60 References

- 1  
2  
3  
4 [1] Prina E, Ranzani OT, Torres A. Community-acquired pneumonia. *Lancet*.  
5  
6 2015;386(9998):1097-108.  
7  
8  
9  
10 [2] Song JH, Huh K, Chung DR. Community-Acquired Pneumonia in the Asia-Pacific  
11  
12 Region. *Semin Respir Crit Care Med*. 2016;37(6):839-54.  
13  
14  
15  
16 [3] Chalmers J, Campling J, Ellsbury G, et al. Community-acquired pneumonia in the  
17  
18 United Kingdom: a call to action. *Pneumonia (Nathan)*. 2017; 9:15.  
19  
20  
21  
22 [4] Cilloniz C, Rodriguez-Hurtado D, Torres A. Characteristics and Management of  
23  
24 Community-Acquired Pneumonia in the Era of Global Aging. *Med Sci (Basel)*.  
25  
26 2018;6(2).  
27  
28  
29  
30 [5] Jain S, Self WH, Wunderink RG, et al. Community-Acquired Pneumonia Requiring  
31  
32 Hospitalization among U.S. Adults[J]. *N Engl J Med*,2015,373(5):415-427.  
33  
34  
35  
36 [6] Almirall J, Serra-Prat M, Bolibar I, et al. Risk Factors for Community-Acquired  
37  
38 Pneumonia in Adults: A Systematic Review of Observational Studies. *Respiration*.  
39  
40 2017;94(3):299-311.  
41  
42  
43  
44  
45 [7] Yeo HJ, Byun KS, Han J, et al. Prognostic significance of malnutrition for long-term  
46  
47 mortality in community-acquired pneumonia: a propensity score matched analysis.  
48  
49 *Korean J Intern Med*. 2019;34(4):841-9.  
50  
51  
52  
53 [8] Cilloniz C, Polverino E, Ewig S, et al. Impact of age and comorbidity on cause and  
54  
55 outcome in community-acquired pneumonia. *Chest*. 2013;144(3):999-1007.  
56  
57  
58  
59 [9] Klausen HH, Petersen J, Lindhardt T, et al. Outcomes in elderly Danish citizens  
60

1  
2  
3  
4 admitted with community-acquired pneumonia. Regional differences, in a public  
5  
6 healthcare system. *Respir Med*. 2012;106(12):1778-87.  
7

8  
9  
10 [10] Falcone M, Blasi F, Menichetti F, et al. Pneumonia in frail older patients: an up to  
11  
12 date. *Intern Emerg Med*. 2012;7(5):415-24.  
13

14  
15  
16 [11] Costa D, Aladio M, Girado C A, et al. Frailty is independently associated with 1-  
17  
18 year mortality after hospitalization for acute heart failure. *Int J Cardiol Heart Vasc*.  
19  
20 2018;7(21):103-106.  
21  
22

23  
24  
25 [12] Walker SR, Gill K, Macdonald K, et al. Association of frailty and physical function  
26  
27 in patients with non-dialysis CKD: a systematic review. *BMC Nephrol*. 2013; 14:228.  
28  
29

30  
31 [13] Flaatten H, De Lange DW, Morandi A, et al. The impact of frailty on ICU and 30-  
32  
33 Day mortality and the level of care in very elderly patients ( $\geq 80$  Years). *Intensive Care*  
34  
35 *Med*. 2017;43(12): 1820–1828.  
36  
37

38  
39 [14] Millett ER, De Stavola BL, Quint JK, et al. Risk factors for hospital admission in  
40  
41 the 28 days following a community-acquired pneumonia diagnosis in older adults, and  
42  
43 their contribution to increasing hospitalization rates over time: a cohort study. *BMJ*  
44  
45 *Open*. 2015;5(12): e008737.  
46  
47

48  
49  
50 [15] Pilotto A, Dini S, Daragjati J, et al. Combined use of the multidimensional  
51  
52 prognostic index (MPI) and procalcitonin serum levels in predicting 1-month mortality  
53  
54 risk in older patients hospitalized with community-acquired pneumonia (CAP): a  
55  
56 prospective study. *Aging Clin Exp Res*. 2018;30(2):193-197.  
57  
58  
59  
60

1  
2  
3  
4 [16] Qu JM, Cao B. [Guidelines for the diagnosis and treatment of adult community  
5  
6  
7  
8  
9  
10  
11  
12  
13  
14  
15  
16  
17  
18  
19  
20  
21  
22  
23  
24  
25  
26  
27  
28  
29  
30  
31  
32  
33  
34  
35  
36  
37  
38  
39  
40  
41  
42  
43  
44  
45  
46  
47  
48  
49  
50  
51  
52  
53  
54  
55  
56  
57  
58  
59  
60

[16] Qu JM, Cao B. [Guidelines for the diagnosis and treatment of adult community acquired pneumonia in China (2016 Edition)]. *Zhonghua Jie He He Hu Xi Za Zhi*. 2016;39(4):241-2.

[17] Mandell LA, Wunderink RG, Anzueto A, et al. Infectious Diseases Society of America/American Thoracic Society consensus guidelines on the management of community-acquired pneumonia in adults. *Clin Infect Dis*. 2007;44 Suppl 2:S27-72.

[18] Fried LP, Tangen CM, Walston J, et al. Frailty in older adults: evidence for a phenotype. *J Gerontol A Biol Sci Med Sci*. 2001;56(3):M146-56.

[19] Charlson ME, Pompei P, Ales KL, et al. A new method of classifying prognostic comorbidity in longitudinal studies: development and validation. *J Chronic Dis*. 1987;40(5):373-83.

[20] Rubenstein LZ, Harker JO, Salvà A, et al. Screening for undernutrition in geriatric practice: developing the short-form mini-nutritional assessment (MNA-SF). *J Gerontol A Biol Sci Med Sci*. 2001 Jun;56(6):M366-72.

[21] Luna CM, Palma I, Niederman MS, et al. The Impact of Age and Comorbidities on the Mortality of Patients of Different Age Groups Admitted with Community-acquired Pneumonia. *Ann Am Thorac Soc*. 2016;13(9):1519-26.

[22] Weir DL, Majumdar SR, McAlister FA, et al. The impact of multimorbidity on short-term events in patients with community-acquired pneumonia: prospective cohort study. *Clin Microbiol Infect*. 2015;21(3):264 e7-e13.

1  
2  
3  
4 [23] Chen J, Chang S, Liu J, et al. Comparison of clinical characteristics and  
5  
6 performance of pneumonia severity score and CURB-65 among younger adults,  
7  
8 elderly and very old subjects. *Thorax*. 2010;65(11): 971-977.

9  
10  
11  
12 [24] Simonetti AF, Viasus D, Garcia-Vidal C, Carratala J. Management of community-  
13  
14 acquired pneumonia in older adults. *Ther Adv Infect Dis*. 2014;2(1):3-16.

15  
16  
17  
18 [25] Morley JE, Vellas B, van Kan GA, et al. Frailty consensus: a call to action. *J Am*  
19  
20 *Med Dir Assoc*. 2013;14(6):392-7.

21  
22  
23  
24 [26] Collard RM, Boter H, Schoevers RA, et al. Prevalence of frailty in community-  
25  
26 dwelling older persons: a systematic review. *J Am Geriatr Soc*. 2012;60(8):1487-92.

27  
28  
29  
30 [27] Lorenzo-Lopez L, Maseda A, de Labra C, et al. Nutritional determinants of frailty  
31  
32 in older adults: A systematic review. *BMC Geriatr*. 2017;17(1):108.

33  
34  
35  
36 [28] Jeejeebhoy KN. Malnutrition, fatigue, frailty, vulnerability, sarcopenia and  
37  
38 cachexia: overlap of clinical features. *Curr Opin Clin Nutr Metab Care*. 2012;15(3):213-  
39  
40  
41  
42 9.

43  
44  
45 [29] Laur CV, McNicholl T, Valaitis R, et al. Malnutrition or frailty? Overlap and  
46  
47 evidence gaps in the diagnosis and treatment of frailty and malnutrition. *Appl Physiol*  
48  
49 *Nutr Metab*. 2017;42(5):449-58.

50  
51  
52  
53 [30] Ma HM, Yu RH, Woo J. Recurrent hospitalization with pneumonia is associated  
54  
55 with higher 1-year mortality in frail older people. *Intern Med J*. 2013;43(11):1210-5.

56  
57  
58  
59 [31] Morley JE. Frailty: diagnosis and management. *J Nutr Health Aging*.  
60

1  
2  
3  
4 2011;15(8):667-70.  
5

6  
7 [32] Falguera M, Ramírez MF. Community-acquired pneumonia. Rev Clin Esp.  
8  
9 2015;215(8):458-467.  
10

11  
12  
13 [33] Gilbert DN. Procalcitonin as a biomarker in respiratory tract infection. Clin Infect  
14  
15 Dis. 2011;52 Suppl 4: S346–50.  
16

17  
18  
19 [34] Heppner HJ, Bertsch T, Alber B. Procalcitonin: inflammatory biomarker for  
20  
21 assessing the severity of community-acquired pneumonia-a clinical observation in  
22  
23 geriatric patients. Gerontology. 2010;56(4):385–9.  
24  
25

26  
27  
28 [35] Hepper HJ, Sieber C, Walger P, et al. Infections in the Elderly. Crit Care Clin.  
29  
30 2013;29(3):757-74.  
31

32  
33  
34 [36] Thiem U, Niklaus D, Sehlhoff B, et al. C-reactive protein, severity of pneumonia  
35  
36 and mortality in elderly, hospitalised patients with community-acquired pneumonia.  
37  
38 Age Ageing. 2009;38(6):693-7.  
39

40  
41  
42 [37] Weiskopf D, Weinberger B, Grubeck-Loebenstien B. The aging of the immune  
43  
44 system. Transpl Int. 2009, 22(11):1041–1050.  
45  
46

47  
48  
49 [38] Lim WS, Baudouin SV, George RC, et al. BTS guidelines for the management of  
50  
51 community acquired pneumonia in adults: update 2009. Thorax. 2009; 64(Suppl 3):  
52  
53 iii1–55.  
54

55  
56  
57 [39] Schoevaerds D, Sibille FX, Gavazzi G. Infections in the older population: what do  
58  
59 we know? Aging Clin Exp Res. 2019 Oct 26.  
60



1  
2  
3  
4 [40] Choi JY, Kim SW, Yoon SJ et al. Impact of frailty on do-not-resuscitate orders and  
5  
6 healthcare transitions among elderly Koreans with pneumonia. *Clin Interv Aging*.  
7  
8 2018;1(13):2237-2245.  
9

10  
11  
12 [41] Gonzalez-Castillo J, Martin-Sanchez FJ, Llinares P, Menendez R, Mujal A, Navas  
13  
14 E, et al. Guidelines for the management of community-acquired pneumonia in the  
15  
16 elderly patient. *Rev Esp Quimioter*. 2014;27(1):69-86.  
17  
18

19  
20  
21 [42] Rubenstein LZ, Stuck AE, Siu AL, et al. Impacts of geriatric evaluation and  
22  
23 management programs on defined outcomes: overview of the evidence. *J Am Geriatr*  
24  
25 *Soc*. 1991;39(9 Pt 2):8S-16S; discussion 7S-8S.  
26  
27  
28  
29  
30  
31  
32  
33  
34  
35  
36  
37  
38  
39  
40  
41  
42  
43  
44  
45  
46  
47  
48  
49  
50  
51  
52  
53  
54  
55  
56  
57  
58  
59  
60

Table 1. Baseline characteristics of the study patients.

| Characteristics                  | Whole population |
|----------------------------------|------------------|
| Age (years), median (IQR)        | 86 (81, 90)      |
| 65-79 years, n (%)               | 49(19.1)         |
| ≥80 years, n (%)                 | 207 (80.9)       |
| Male, n (%)                      | 180 (70.3)       |
| Smoking status, n (%)            |                  |
| Current-smoker                   | 29 (11.3)        |
| Ex-smoker                        | 71 (27.7)        |
| Non-smoker                       | 156 (60.9)       |
| Comorbidity, n (%)               |                  |
| Congestive heart failure         | 102 (39.8)       |
| Myocardial infarction            | 33 (12.9)        |
| Cerebrovascular disease          | 143 (55.9)       |
| Diabetes mellitus                | 103 (40.2)       |
| Chronic pulmonary disease*       | 110 (43.0)       |
| Renal disease                    | 32 (12.5)        |
| Hematological malignance         | 6 (2.4)          |
| Solid malignancy                 | 45 (17.6)        |
| Malnutrition, n (%) <sup>†</sup> | 71 (27.7)        |
| Frailty, n (%) <sup>‡</sup>      |                  |
| Non-frail                        | 85 (33.2)        |
| Frail                            | 171 (66.8)       |
| SCAP, n (%) <sup>§</sup>         | 57 (22.3)        |

---

**Mortality**

|                         |           |
|-------------------------|-----------|
| 30-day mortality, n (%) | 14 (5.5)  |
| 1-year mortality, n (%) | 43 (16.8) |

---

Abbreviations: IQR, inter-quartile range; SCAP, severe community acquired pneumonia.

\* Chronic lung disease includes chronic obstructive pulmonary disease, asthma, bronchiectasis, and interstitial lung disease.

† Malnutrition: defined by MNA-SF scores  $\leq 7$ .

‡ Frail: defined by Fried Phenotype score  $\geq 3$ .

§ SCAP: defined by IDSA/ATS criteria (2007).

Table 2. Analysis of CAP-related risk factors and prognosis stratified by frailty status

| Characteristics                        | Non-frail           | Frail*              | P values |
|----------------------------------------|---------------------|---------------------|----------|
| N                                      | 85                  | 171                 |          |
| Age median (IQR)                       | 83 (75, 87)         | 88 (84, 91)         | <0.001   |
| Sex, n (%)                             |                     |                     |          |
| Female                                 | 17(20.00)           | 59(34.50)           | 0.017    |
| Male                                   | 68(80.00)           | 112(65.50)          |          |
| Smoking status                         |                     |                     |          |
| Current-smoker                         | 11                  | 18                  | 0.288    |
| Ex-smoker                              | 28                  | 43                  |          |
| Non-smoker                             | 46                  | 110                 |          |
| BMI (kg/m <sup>2</sup> ) mean ± SD     | 24.17±3.80          | 22.25±4.40          | 0.001    |
| Barthel Index median (IQR)             | 95 (85, 100)        | 50 (20, 70)         | <0.001   |
| CCI median (IQR)                       | 3 (2, 4)            | 4 (3, 6)            | <0.001   |
| MNA-SF median (IQR)                    | 12 (11, 14)         | 9 (7, 11)           | <0.001   |
| SCAP <sup>†</sup> , n (%)              | 8(9.41)             | 49(28.65)           | <0.001   |
| PCT (ng/ml) median (IQR)               | 0.27 (0.20, 0.37)   | 0.29 (0.21, 0.55)   | 0.149    |
| hs-CRP (mg/L) median (IQR)             | 19.63 (4.19, 54.29) | 27.08 (7.56, 62.43) | 0.129    |
| WBC (*10 <sup>9</sup> /L) median (IQR) | 7.02 (5.64,9.01)    | 8.02 (5.51, 12.33)  | 0.043    |
| HGB (g/L) median (IQR)                 | 127 (120, 136)      | 115 (100,128)       | <0.001   |
| Scr (umol/L) median (IQR)              | 78.6 (67.4, 90.5)   | 75.2 (59.5, 101.6)  | 0.720    |
| BUN (mmol/L) median (IQR)              | 5.99 (4.30, 7.01)   | 5.98 (4.79, 8.65)   | 0.039    |
| ALT (U/L) median (IQR)                 | 15 (11, 22)         | 13 (10, 21)         | 0.058    |
| ALB (g/L) mean ± SD                    | 34.38±4.22          | 31.50±4.16          | <0.001   |

|                         |                  |                  |        |
|-------------------------|------------------|------------------|--------|
| PA (g/L) mean $\pm$ SD  | 18.74 $\pm$ 6.41 | 15.98 $\pm$ 5.88 | 0.001  |
| 30-day mortality, n (%) | 0(0)             | 14(8.19)         | 0.015  |
| 1-year mortality, n (%) | 0(0)             | 43(25.15)        | <0.001 |

Abbreviations: SD, standard deviation; IQR, inter-quartile range; BMI, Body Mass Index; CCI, Charlson's Comorbidity Index; MNA-SF, Mini Nutritional Assessment-Short Form; SCAP, severe community acquired pneumonia; PCT, procalcitonin; hs-CRP, high sensitivity C-reactive protein; WBC, the leukocyte count; HGB, hemoglobin; BUN, blood urea nitrogen; Scr, serum creatinine; ALT, alanine aminotransferase; ALB, albumin; PA, prealbumin.

\* Frail: defined by Fried Phenotype score  $\geq$  3.

† SCAP: defined by the IDSA/ATS criteria (2007).

Table 3. Significant risk factors for 30-day mortality in patients with CAP in COX proportional hazards regression analyses (n =256)

| Variable     | Univariate |             |                 | Multivariable |             |                 |
|--------------|------------|-------------|-----------------|---------------|-------------|-----------------|
|              | HR         | 95%CI       | <i>P</i> -Value | HR            | 95%CI       | <i>P</i> -Value |
| SCAP         | 52.01      | 6.80-398.09 | <0.001          | 30.60         | 3.77-248.06 | 0.001           |
| Malnutrition | 0.84       | 0.73-0.97   | 0.015           | 1.11          | 0.90-1.35   | 0.330           |
| Frail        | 2.58       | 1.42-4.69   | 0.002           | 1.83          | 0.88-3.81   | 0.108           |
| CCI          | 1.41       | 1.19-1.67   | <0.001          | 1.19          | 0.99-1.43   | 0.069           |

Data are shown as estimated HR (95% CIs) of the explanatory variables in the 30-day mortality group.

Abbreviations: HR, hazards ratio; CI, confidence interval; CCI, Charlson's Comorbidity Index; SCAP, severe community acquired pneumonia.

Table 4. Significant risk factors for 1-year mortality in patients with CAP in COX proportional hazards regression analyses (n =256)

| Variable     | Univariate |            |         | Multivariable |            |         |
|--------------|------------|------------|---------|---------------|------------|---------|
|              | HR         | 95%CI      | P-Value | HR            | 95%CI      | P-Value |
| SCAP         | 13.32      | 6.81-26.04 | <0.001  | 7.68          | 3.79-15.58 | <0.001  |
| BI           | 0.98       | 0.97-0.99  | <0.001  | 1.01          | 0.99-1.02  | 0.352   |
| BMI          | 0.93       | 0.87-1.00  | 0.038   | 1.07          | 0.98-1.16  | 0.128   |
| Malnutrition | 0.78       | 0.72-0.85  | <0.001  | 0.94          | 0.81-1.10  | 0.424   |
| Frail        | 3.41       | 2.32-5.03  | <0.001  | 2.70          | 1.69-4.39  | <0.001  |
| CCI          | 1.40       | 1.26-1.55  | <0.001  | 1.19          | 1.05-1.34  | <0.001  |

Data are shown as estimated HR (95% CIs) of the explanatory variables in the 1-year mortality group.

Abbreviations: HR, hazards ratio; CI, confidence interval; SCAP, severe community acquired pneumonia; BI, Barthel Index; BMI, Body Mass Index; CCI, Charlson's Comorbidity Index.

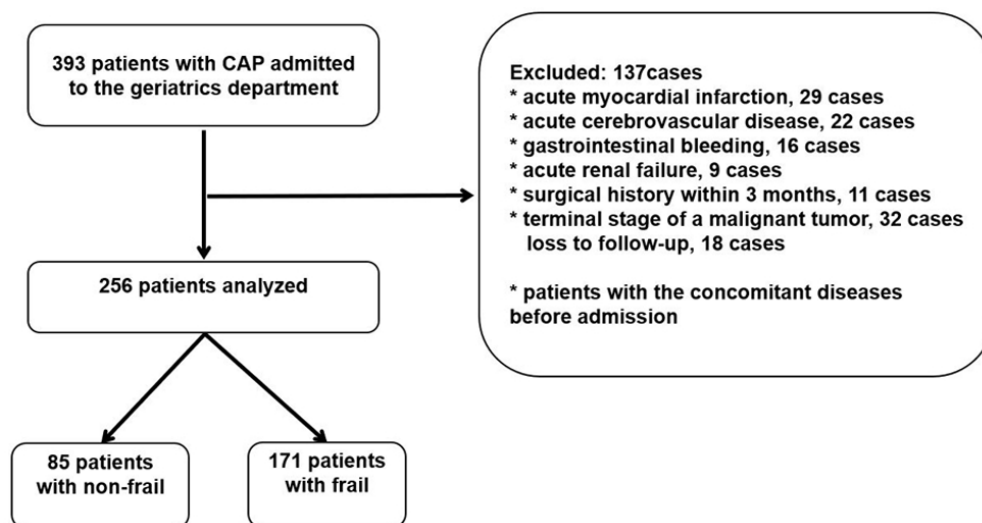

Figure 1. Flow chart of the study population



# BMJ Open

## The impact of frailty on 30-day and 1-year mortality in hospitalized elderly patients with community-acquired pneumonia: a prospective observational study

|                                 |                                                                                                                                                                                                                                                                                                                                                                                                                                       |
|---------------------------------|---------------------------------------------------------------------------------------------------------------------------------------------------------------------------------------------------------------------------------------------------------------------------------------------------------------------------------------------------------------------------------------------------------------------------------------|
| Journal:                        | <i>BMJ Open</i>                                                                                                                                                                                                                                                                                                                                                                                                                       |
| Manuscript ID                   | bmjopen-2020-038370.R1                                                                                                                                                                                                                                                                                                                                                                                                                |
| Article Type:                   | Original research                                                                                                                                                                                                                                                                                                                                                                                                                     |
| Date Submitted by the Author:   | 25-May-2020                                                                                                                                                                                                                                                                                                                                                                                                                           |
| Complete List of Authors:       | luo, jia; Capital Medical University Affiliated Beijing Friendship Hospital, Geriatric department;<br>Tang, Wen; Capital Medical University Affiliated Beijing Friendship Hospital, Department of Geriatrics<br>Ying, Sun; Capital Medical University Affiliated Beijing Friendship Hospital, Department of Geriatrics<br>Jiang, Chunyan; Capital Medical University Affiliated Beijing Friendship Hospital, Department of Geriatrics |
| <b>Primary Subject Heading</b>: | Geriatric medicine                                                                                                                                                                                                                                                                                                                                                                                                                    |
| Secondary Subject Heading:      | Respiratory medicine, Medical management, Infectious diseases                                                                                                                                                                                                                                                                                                                                                                         |
| Keywords:                       | GERIATRIC MEDICINE, INTERNAL MEDICINE, Respiratory infections < THORACIC MEDICINE, RESPIRATORY MEDICINE (see Thoracic Medicine)                                                                                                                                                                                                                                                                                                       |
|                                 |                                                                                                                                                                                                                                                                                                                                                                                                                                       |

SCHOLARONE™  
Manuscripts



I, the Submitting Author has the right to grant and does grant on behalf of all authors of the Work (as defined in the below author licence), an exclusive licence and/or a non-exclusive licence for contributions from authors who are: i) UK Crown employees; ii) where BMJ has agreed a CC-BY licence shall apply, and/or iii) in accordance with the terms applicable for US Federal Government officers or employees acting as part of their official duties; on a worldwide, perpetual, irrevocable, royalty-free basis to BMJ Publishing Group Ltd ("BMJ") its licensees and where the relevant Journal is co-owned by BMJ to the co-owners of the Journal, to publish the Work in this journal and any other BMJ products and to exploit all rights, as set out in our [licence](#).

The Submitting Author accepts and understands that any supply made under these terms is made by BMJ to the Submitting Author unless you are acting as an employee on behalf of your employer or a postgraduate student of an affiliated institution which is paying any applicable article publishing charge ("APC") for Open Access articles. Where the Submitting Author wishes to make the Work available on an Open Access basis (and intends to pay the relevant APC), the terms of reuse of such Open Access shall be governed by a Creative Commons licence – details of these licences and which [Creative Commons](#) licence will apply to this Work are set out in our licence referred to above.

Other than as permitted in any relevant BMJ Author's Self Archiving Policies, I confirm this Work has not been accepted for publication elsewhere, is not being considered for publication elsewhere and does not duplicate material already published. I confirm all authors consent to publication of this Work and authorise the granting of this licence.

1  
2  
3  
4 The impact of frailty on 30-day and 1-year mortality in hospitalized elderly patients  
5  
6 with community-acquired pneumonia: a prospective observational study  
7  
8

9  
10 Jia Luo, MD; Wen Tang\*, MD, PhD; Ying Sun, MD, PhD; Chun-Yan Jiang, MD, PhD.  
11

12  
13 Department of Geriatrics, Beijing Friendship Hospital, Capital Medical University,  
14  
15 Beijing, 100050, P. R. China.  
16  
17

18  
19 **Short title:** Impact of frailty on community-acquired pneumonia  
20  
21

22  
23 **Word count:** Abstract—279; Manuscript--2799  
24  
25

26  
27 **Corresponding Author:**  
28

29  
30 Wen Tang, MD, PhD. Department of Geriatrics, Beijing Friendship Hospital, Capital  
31  
32 Medical University. Postal address: No. 95, Yong' an Road, Xicheng District,  
33  
34 Beijing 100050, P. R. China. Email: twybxz@163.com. Tel: + (86 10) 63137642 / +86  
35  
36 15810683607. Fax: + (86 10) 63138795.  
37  
38  
39  
40  
41  
42  
43  
44  
45  
46  
47  
48  
49  
50  
51  
52  
53  
54  
55  
56  
57  
58  
59  
60

## Abstract

**Objectives:** This study aimed to evaluate the impact of frailty on 30-day and 1-year mortality among elderly patients with community-acquired pneumonia (CAP). The major hypothesis was that frailty, a clinical state of increased vulnerability, is a good predictor of prognosis in elderly CAP patients.

**Design:** Prospective, observational, follow-up cohort study.

**Setting:** One 2000-bed tertiary care hospital in Beijing, China.

**Participants:** Consecutive CAP patients aged  $\geq 65$  years admitted to the geriatric department between September 2017 and February 2019.

**Main outcome measures:** The primary outcomes were all-cause mortality at 30 days and 1 year after admission to the hospital. Cox regression was used to assess the impact of frailty (defined by Frailty Phenotype) on 30-day and 1-year mortality of elderly patients with CAP.

**Results:** The cohort included 256 patients. Median (IQR) age was 86 (81, 90) with 180 (70.3%) males. 171/256 (66.8%) patients were frail. The prevalence of frailty was significantly associated with older age, female, lower BMI, comorbidity, worse activities of daily living, and poorer nutritional status. Compared to non-frail patients, the frail patients were more likely present with severe CAP (28.65% vs. 9.41%,  $P < 0.001$ ) and with higher 30-day mortality (8.19% vs. 0%,  $P = 0.034$ ) and 1-year mortality (25.15% vs. 0%,  $P < 0.001$ ). In multivariate Cox regression analysis, frailty was independently

1  
2  
3  
4 associated with an increased risk of 1-year mortality (multivariate-adjusted HR 2.70,  
5  
6 95% CI 1.69-4.39) after adjustment for age, sex, disability, malnutrition, comorbidities,  
7  
8 and the severity of CAP. The association between frailty and 30-day mortality was not  
9  
10 significant.  
11  
12

13  
14  
15 **Conclusions:** The current findings suggest that frailty is strongly associated with  
16  
17 severe CAP and higher 1-year mortality in elderly CAP patients, and it should be  
18  
19 considered in the management of CAP in elderly patients.  
20  
21

22  
23  
24 **Keywords:** Community-acquired pneumonia; Frailty; Elderly; Prognosis.  
25  
26

### 27 **Strengths and limitations of this study**

- 28  
29  
30 1. This study addresses the paucity of knowledge on frailty in elderly patients with  
31  
32 community-acquired pneumonia.  
33  
34  
35 2. This study summarized and analyzed well-known prognosis variables (such as  
36  
37 age, disability, malnutrition, comorbidities, the severity of CAP) and frailty, and  
38  
39 proved the significance of frailty to prognosis by multivariate analysis.  
40  
41  
42 3. Frailty was defined by the Fried Frailty Phenotype, which is well validated and  
43  
44 simple to use.  
45  
46  
47 4. This was a small sample, single-center study, with relatively few end-point events.  
48  
49  
50 5. The impact of frailty on the outpatients with CAP unproven.  
51  
52  
53  
54  
55  
56  
57  
58  
59  
60

## Introduction

Community-acquired pneumonia (CAP) is the leading cause of infectious disease in the elderly and is associated with high rates of mortality, morbidity, and high costs worldwide.<sup>[1, 2, 3, 4]</sup> In the United States, the incidence of CAP in adults between 65 and 79 years old is 63 cases per 10,000 adults and increases to 164.3 cases per 10,000 adults in the over-80 age group.<sup>[5]</sup> In China, the reported mortality due to pneumonia is 23.55 cases per 100,000 adults aged between 65 and 69 years old and nearly 36 times greater in persons over 85 years.<sup>[6]</sup>

Well-known risk factors for mortality, such as age, functional status, comorbidities, and others, have already been incorporated into the assessment of the severity of CAP,<sup>[4,6,7,8,9,10]</sup> but increasing mortality in elderly CAP patients indicates the need for the identification of novel, ideally modifiable, risk factors for poor outcomes. Particular attention has recently been directed to the concept of the “frail elderly patient”. Although frailty has been considered synonymous with disability, comorbidity, or advanced old age, it is defined as a cumulative decline and loss of physiological reserves in multiple organs and systems and causes increased vulnerability to adverse outcomes, including falls, hospitalization, and mortality.<sup>[11,12,13]</sup> Moreover, frailty has been confirmed to be an independent risk factor for mortality in patients with acute and chronic diseases.<sup>[14,15]</sup> A European multicenter study that included 5021 patients assessed the impact of frailty on intensive care unit (ICU) admission and 30-day mortality in elderly patients. The results indicated that frailty (measured by the Clinical Frailty Scale) was found in 43% of patients and was independently related to 30-day

1  
2  
3  
4 survival (hazard ratio (HR) 1.54; 95% confidence interval (CI) 1.38-1.73 for frail versus  
5  
6 non-frail patients).<sup>[16]</sup> The few reported studies focused on frailty and CAP have  
7  
8 indicated that frailty factors contributed to increasing post-CAP hospitalizations,<sup>[17]</sup> and  
9  
10 frailty significantly predicted 1-month mortality in older patients.<sup>[18]</sup> Therefore, we  
11  
12 hypothesized that frailty was related to the prognosis of CAP, especially the presence  
13  
14 of frailty was associated with negative predictive value in elderly CAP patients (in terms  
15  
16 of CAP prognosis and mortality).

17  
18  
19  
20  
21  
22  
23 In this study, we aimed to assess the prevalence of frailty in older patients admitted  
24  
25 with CAP, the association of frailty with CAP severity, the mortality within 30-day and  
26  
27 1-year after admission. This information will be helpful for the early stratification of high-  
28  
29 risk patients and the implementation of the hierarchical management of modifiable  
30  
31 factors to improve the prognosis of elderly patients with CAP.

## 32 33 34 35 36 37 Methods

### 38 39 40 1. Study design

41  
42  
43 We prospectively enrolled consecutive elderly patients (age  $\geq 65$  years) diagnosed  
44  
45 with CAP in the geriatric department from September 2017 to February 2019. The  
46  
47 exclusion criteria were as follows: 1) Complicated with acute myocardial infarction,  
48  
49 acute cerebrovascular disease, gastrointestinal bleeding, or acute renal failure. 2)  
50  
51 Surgical history within 3 months. 3) Terminal stage of a malignant tumor.

52  
53  
54  
55  
56  
57 CAP was defined as pneumonia acquired outside the hospital by an immune-  
58  
59 competent individual. The specific criteria for the diagnosis of CAP were as follows: (1)  
60

1  
2  
3  
4 community-onset and (2) the presence of new infiltrate on chest X-ray or a computed  
5  
6 tomography scan together with at least one of the following: (i) new or increased cough  
7  
8 (productive, nonproductive or with a change in sputum characteristics) with or without  
9  
10 dyspnea, chest pain or hemoptysis; (ii) fever; (iii) rales and/or signs of consolidation;  
11  
12 (iv) peripheral WBC count  $> 10,000$  cells  $\text{mm}^{-3}$  or  $< 4000$  cells  $\text{mm}^{-3}$ , with or without a  
13  
14 leftward shift toward immature forms. The exclusion of tuberculosis, lung cancer,  
15  
16 noninfectious pulmonary interstitial disease, pulmonary edema, atelectasis, pulmonary  
17  
18 embolism, pulmonary eosinophilic infiltration, and pulmonary vasculitis can establish a  
19  
20 clinical diagnosis.<sup>[6]</sup>  
21  
22  
23  
24  
25  
26  
27

## 28 2. Baseline assessment

29  
30  
31 The following parameters were evaluated within 24 hours of admission: age, sex,  
32  
33 body mass index (BMI), smoking history, procalcitonin (PCT), high-sensitivity C-  
34  
35 reactive protein (hs-CRP), white blood count (WBC), hemoglobin (HGB), alanine  
36  
37 aminotransferase (ALT), albumin (ALB), prealbumin (PA), serum creatinine (Scr) and  
38  
39 blood urea nitrogen (BUN). All the Comprehensive Geriatric Assessment including  
40  
41 frailty, comorbidity, function, and nutrition status conducted by trained evaluators within  
42  
43  
44  
45  
46  
47  
48  
49  
50  
51  
52  
53  
54  
55  
56  
57  
58  
59  
60  
24 hours of admission.

## 51 3. Severity of CAP

52  
53  
54 The diagnostic criteria for severe CAP (SCAP) from the Infectious Diseases Society  
55  
56 of America (IDSA) / American Thoracic Society (ATS) were used.<sup>[19]</sup> For the diagnosis  
57  
58 of SCAP, at least 1 major or 3 minor criteria must be satisfied. The major criteria are  
59  
60



1  
2  
3  
4 the need for mechanical ventilation or septic shock. The minor criteria are as follows:  
5  
6 respiratory rate >130 breaths/min; arterial oxygen pressure/fraction of inspired oxygen  
7  
8 (PaO<sub>2</sub>/FiO<sub>2</sub>) ratio <250; multilobar infiltrate; confusion; blood urea nitrogen level >120  
9  
10 mg/dL; leukopenia resulting from infection; thrombocytopenia; hypothermia; or  
11  
12 hypotension requiring aggressive fluid resuscitation.  
13  
14  
15

#### 16 17 18 4. Frailty assessment 19

20  
21 Frailty was assessed by the Frailty Phenotype (FP): unintentional weight loss, self-  
22  
23 reported exhaustion, weakness, slow gait speed, and low physical activity.<sup>[20]</sup> Each  
24  
25 construct is assigned “1” if present or “0” if absent. The FP ranges from 0–5; consistent  
26  
27 with established definitions, in this study we defined frailty as the FP score of ≥3, non-  
28  
29 frail as the FP score of 0-2.  
30  
31  
32  
33

#### 34 35 5. Covariates 36

37  
38 Comorbidity was evaluated with the Charlson Comorbidity Index (CCI).<sup>[21]</sup> The CCI  
39  
40 is the sum of the weighted measures of the following 17 chronic medical conditions:  
41  
42 ischemic heart disease, congestive heart failure, cerebrovascular accident, peripheral  
43  
44 vascular diseases, chronic lung diseases, diabetes, dementia, connective tissue  
45  
46 diseases, renal diseases, liver diseases, hemiplegia, solid or hematological  
47  
48 malignancy, and acquired immunodeficiency disease. A score of 1, 2, 3, or 6 is  
49  
50 assigned to each disease, depending on the severity.  
51  
52  
53  
54  
55

56  
57 Functional status assessments were carried out with the Barthel Index (BI) to  
58  
59 evaluate the activities of daily living.<sup>[22]</sup>  
60

1  
2  
3  
4 The nutritional status assessment was conducted with the unified Mini Nutritional  
5  
6 Assessment-Short Form (MNA-SF) questionnaire.<sup>[23]</sup> The questionnaire consists of  
7  
8 BMI, weight loss in the past 3 months, dietary changes, stress or acute illness, activity,  
9  
10 and neuropsychiatric diseases. The total score is 14 points. Scores of 0-7 indicated  
11  
12 malnutrition.  
13  
14  
15  
16

## 17 5. Follow-up and outcomes

18  
19  
20  
21 All patients were followed for 1 year after admission. Deaths were confirmed  
22  
23 through surveillance or matched to official death records. The primary outcomes were  
24  
25 all-cause mortality at 30 days and 1 year after admission to the hospital.  
26  
27  
28

## 29 6. Statistical analysis

30  
31  
32  
33 Statistical analyses were performed with IBM SPSS software 23.0 (Chicago, USA).  
34  
35  
36 Continuous variables were expressed as the means  $\pm$  standard deviation (SD) or  
37  
38 interquartile range (IQR) and compared using Student's t-test or the Mann-Whitney U  
39  
40 test. Categorical variables were compared using the chi-squared test or Fisher's exact  
41  
42 test. Univariate and multivariate Cox proportional hazards regression models were  
43  
44 used to calculate the hazard ratio (HR) with 95% confidence interval (CI) for the  
45  
46 analysis of the association between frailty status at baseline and 30-day and 1-year  
47  
48 all-cause mortality. In all analyses, two-tailed p values  $< 0.05$  were considered to  
49  
50 indicate significance.  
51  
52  
53  
54  
55

## 56 Patient and public involvement

1  
2  
3  
4 Patients or the public did not involve in the design of the study, recruitment or  
5  
6  
7  
8  
9  
10  
11  
12  
13  
14  
15  
16  
17  
18  
19  
20  
21  
22  
23  
24  
25  
26  
27  
28  
29  
30  
31  
32  
33  
34  
35  
36  
37  
38  
39  
40  
41  
42  
43  
44  
45  
46  
47  
48  
49  
50  
51  
52  
53  
54  
55  
56  
57  
58  
59  
60

Patients or the public did not involve in the design of the study, recruitment or  
conduction of the study. There are no plans to involve participants in dissemination of  
results. The results of the study would be disseminated to patients once he or she  
requests so and aggregated data would be reported in project reports and research  
publications and conferences.

## Results

In total, 393 patients with CAP were admitted to our department during the study  
period, 119 patients with the concomitant diseases before admission were excluded  
(Figure.1), and 18 were excluded due to loss to follow-up. A total of 256 patients (range,  
65-99 years) were included for the final statistical analysis. Demographic patient  
characteristics are presented in Table 1. Median (IQR) population age was 86 (81, 90)  
with 180 (70.3%) males. The frail and malnutrition status were reported in 171 (66.8%)  
and 71 (27.7%), respectively. Fifty-seven (22.3%) of the patients had SCAP. All-cause  
mortality for the 256 patients with CAP was 5.5% at 30 days and 16.8% at 1 year.

In the analysis 85 (33.2%) non-frail subjects were compared to the frail group of 171  
(66.8%) patients. Frailty was significantly associated with older age, female, lower BMI,  
worse activity ability of daily living function, comorbidity, and poorer nutritional status.  
The proportion of SCAP in the frail group is higher (28.65% vs 9.41%,  $P < 0.001$ ), and  
frail patients experienced higher 30-day mortality ( $P = 0.015$ ) and 1-year mortality  
( $P < 0.001$ ). The results of Cox proportional hazards regression are presented in Table  
2 and Table 3. Several variables were significantly associated with 30-day mortality in

1  
2  
3  
4 univariate, including SCAP, frailty, malnutrition, CCI. In a multivariate analysis (Table  
5  
6 2) only SCAP (multivariate-adjusted HR 30.60, 95% CI 3.77-248.06) remained  
7  
8 significant. To determine the significant risk factors for 1-year mortality in patients with  
9  
10 CAP (Table 3), in a multivariate analysis, SCAP (adjusted HR 7.68; 95% CI: 3.79-  
11  
12 15.58), frailty (adjusted HR 2.70, 95% CI 1.69-4.39), and CCI (adjusted HR 1.19, 95%  
13  
14 CI 1.05-1.34) were independent risk factors for 1-year mortality.  
15  
16  
17  
18  
19

20  
21 Furthermore, we conducted a subgroup analysis only enrolled severe CAP patients.  
22  
23 In all SCAP subjects (n=57), eight patients (14%) were non-frail and forty-nine patients  
24  
25 (86%) were frail. The frail group with SCAP reported worse activity ability of daily living  
26  
27 function and nutritional status, higher 30-day and 1-year mortality (Table 4). Several  
28  
29 variables were significantly associated with 1-year mortality of SCAP in univariate,  
30  
31 including frailty, malnutrition, function status, CCI. In a multivariate analysis (Table 5)  
32  
33 only frailty (adjusted HR 2.87, 95% CI 1.58-4.96) and CCI (adjusted HR 1.16, 95% CI  
34  
35 1.01-1.34) remained significant. There was no significant risk factor correlated with the  
36  
37 30-day mortality after the multivariate analysis.  
38  
39  
40  
41  
42  
43

#### 44 Discussion

45  
46  
47  
48 The key points of this study are as follows: 1. Our study identified that frail CAP  
49  
50 patients were significantly more likely to present with severe pneumonia and had  
51  
52 significantly increased 30-day and 1-year mortality; 2. Frailty was an independent risk  
53  
54 factor correlated with 1-year mortality even after adjustment for age, sex, disability,  
55  
56 malnutrition, comorbidities, and severity of CAP, but it was not the independent risk  
57  
58  
59  
60

1  
2  
3  
4 factor for the 30-day mortality.  
5  
6

7 The incidence of CAP increases with increasing age and results in higher risks of  
8 morbidity and mortality. Mortality in elderly patients with CAP maybe 25% higher than  
9 in the general population (10%).<sup>[4,9]</sup> Our study demonstrated that all-cause mortality for  
10 elderly patients with CAP was 5.5% at 30 days and 16.8% at 1 year. Different  
11 independent prognostic factors related to mortality have been well described, including  
12 age, comorbidities, functional status, microbial etiology, and early adequate antibiotic  
13 treatment.<sup>[9,10,24,25]</sup> Recently, most authors noted that in the elderly population, age *per*  
14 se is not an independent predictor of mortality.<sup>[26,27]</sup> Interestingly, We found that all  
15 patients who died were in the frail-group, whether in 30-day or 1-year followed-up.  
16 Although frailty is considered to be synonymous with disability, comorbidity, or  
17 advanced age, Fried LP *et al* defined it as a complex age-related clinical condition  
18 characterized by a decline in physiological capacity across several organ systems, with  
19 a resultant increased susceptibility to stressors.<sup>[20,28,29]</sup> This vulnerability results in an  
20 increased risk of adverse health outcomes including falls, disability, hospitalization,  
21 institutionalization, and death. Various conditions, including malnutrition, sarcopenia,  
22 gait impairment, chronic inflammation, polypharmacy, cardiovascular changes, and  
23 morbidity, were found to be associated with and potential causes of frailty.<sup>[30,31,32]</sup>  
24  
25  
26  
27  
28  
29  
30  
31  
32  
33  
34  
35  
36  
37  
38  
39  
40  
41  
42  
43  
44  
45  
46  
47  
48  
49  
50

51 Consistent with the findings of other studies,<sup>[30]</sup> we found that frail group patients  
52 characterized with older age, more females, more comorbidities, worse nutrition status,  
53 poorer functional status, and lower activities of daily life abilities. Poor nutritional status,  
54 which in different studies encompassed hypoalbuminemia, hypoproteinemia,  
55  
56  
57  
58  
59  
60

1  
2  
3  
4 malnourishment, or a low nutritional score, was a strong predictor of mortality in CAP  
5  
6 patients.<sup>[33,34]</sup> However, in our study, there was no significant association between the  
7  
8 nutrition status and 30 day or 1-year mortality after multivariate analysis (adjust-HR  
9  
10 1.11, 95% CI 0.90-1.35; adjust-HR 0.94, 95% CI 0.81-1.10, respectively). Recent  
11  
12 studies have shown that frailty and malnutrition are intrinsically interrelated in terms of  
13  
14 structure, identification tools, and treatment.<sup>[30,32,35]</sup> Malnutrition is also an important  
15  
16 biological mechanism underlying the occurrence and development of frailty.<sup>[31]</sup> In our  
17  
18 study, frailty was defined by the Fried Phenotype criterion, in which not only got  
19  
20 unintentional weight loss as a criterion but also included functional status such as slow  
21  
22 gate speed and low levels of physical activity. This may explain why frailty, but not  
23  
24 malnutrition and disability, was significantly associated with higher mortality in  
25  
26 multivariate analysis.  
27  
28  
29  
30  
31  
32  
33  
34  
35

36 Our study also confirmed that frailty was very common in elderly patients with CAP  
37  
38 (the prevalence was 66.8%) and significantly associated with the severity of the  
39  
40 disease, for 1-year, frailty HR of 2.70 is nearly triple the mortality of non-frail. Many  
41  
42 authors have evaluated longer-term patient outcomes, either at 90 days or 1 year after  
43  
44 CAP.<sup>[36]</sup> In all cases, the mortality risk was associated with the patient characteristics,  
45  
46 i.e., underlying diseases, more than with the characteristics of the acute episode.<sup>[25]</sup>  
47  
48  
49  
50  
51 Unfortunately, in these studies, the basic status assessment of patients only included  
52  
53 variables such as age, malnutrition, daily living ability, and comorbidities, but few of  
54  
55 them considered about frailty. The results of the study demonstrated that frailty was  
56  
57 independently associated with 1-year mortality after adjusting for the variables  
58  
59  
60

1  
2  
3  
4 mentioned earlier, which implies that frailty can effectively predict the adverse  
5  
6 outcomes.  
7

8  
9  
10 Many biomarkers of infection, such as the WBC, CRP, and PCT, have been found  
11  
12 to play roles in the early diagnosis and prognosis of CAP,<sup>[37,38]</sup> but their applicability in  
13  
14 geriatric patients has not yet been clearly established. The CRP level and the WBC  
15  
16 count, like clinical signs and symptoms, are not always reliable parameters in geriatric  
17  
18 patients because they may occasionally fall in the normal range (especially in the  
19  
20 elderly).<sup>[39]</sup> An analysis of a retrospective cohort of 438 CAP patients aged  $\geq 65$  years  
21  
22 did not reveal any association between CRP or WBC and mortality, or between CRP  
23  
24 or WBC and pneumonia severity.<sup>[40]</sup> Our results suggested that more patients in the  
25  
26 frail group developed severe pneumonia, both hs-CRP and PCT were no significant  
27  
28 differences between the two groups. Immunosenescence, defined as immunological  
29  
30 changes that occur with age, is known to be responsible for the increased susceptibility  
31  
32 of elderly persons to infectious diseases and for their limited response to vaccines.<sup>[41]</sup>  
33  
34 Elderly patients have an inadequate inflammatory response to infection, which can  
35  
36 lead to an underestimation of the severity of pneumonia and, consequently, a delay in  
37  
38 the initiation of anti-infective therapy.<sup>[42]</sup>  
39  
40  
41  
42  
43  
44  
45  
46  
47  
48  
49

50 Our finding suggested that frail patients are more likely present with severe CAP,  
51  
52 and frailty is strongly related to the prognosis of 1-year mortality. Since the clinical  
53  
54 presentation of pneumonia in the elderly may be atypical, clinicians should suspect  
55  
56 pneumonia presenting with symptoms such as falls, altered mental status, fatigue,  
57  
58 delirium, and anorexia to avoid the complications associated with delayed diagnosis  
59  
60

1  
2  
3  
4 and therapy.<sup>[43]</sup> With respect to clinical decision making and the planning of health care,  
5  
6 it is important to identify frailty in elderly CAP patients to better stratify their risk of  
7  
8 adverse outcomes and plan more specific care tailored to the needs of each patient,  
9  
10 such as invasive diagnostic and therapeutic procedures and the final placement of the  
11  
12 patient. In a Korean study, frailty was independently associated with do-not-resuscitate  
13  
14 orders and different healthcare transitions, even after adjustment for sepsis and  
15  
16 pneumonia severity.<sup>[44]</sup> An international multidisciplinary group studying geriatric  
17  
18 patients proposed an integral geriatric assessment (IGA)<sup>[45]</sup> adapted to the emergency  
19  
20 department (ED) context to assess frailty in elderly patients.<sup>[16,46]</sup> Even if many  
21  
22 physicians and intensivists do not currently undertake the performance of a specific  
23  
24 geriatric assessment in critically ill, geriatric patients with infectious diseases, ongoing  
25  
26 demographic shifts toward the elderly population will likely force the consideration of  
27  
28 this issue soon. Moreover, we should note that frailty is not an inevitable consequence  
29  
30 of aging (even at advanced ages, many people do not become frail) and is a dynamic  
31  
32 condition, and individuals can transition in and out of frailty states. The frail prevention  
33  
34 is possible, especially during the early stages, and prompt identification is crucial to  
35  
36 maximize opportunities for intervention.<sup>[11]</sup> Therefore, frailty should be measured in  
37  
38 routine clinical practice to improve the management of elderly patients with CAP and  
39  
40 that the post-discharge management of frail patients with CAP is also important.  
41  
42  
43  
44  
45  
46  
47  
48  
49  
50  
51

52  
53  
54 Finally, we need to note that as a single-center prospective study, there is a lack of  
55  
56 comparison with data from other hospitals and regions; the numbers of patients and  
57  
58 end-point events were relatively small, and there were many restrictive factors, so the  
59  
60



1  
2  
3  
4 results have certain limitations. This study summarized and analyzed age,  
5  
6 comorbidities, frailty, and other factors, as well as various prognostic factors selected  
7  
8 by multivariate analysis. The findings are still valuable for guiding the treatment and  
9  
10 determining the prognosis of CAP in the elderly population. We expect to obtain  
11  
12 multicenter and large-sample data in future studies to confirm our research hypothesis.  
13  
14  
15

## 17 Conclusions

20  
21 In summary, frailty was very common in elderly patients with CAP, and frail patients  
22  
23 were more likely to suffer from severe disease and with higher 1-year mortality  
24  
25 compared with non-frail patients. Our findings suggest that frailty should be considered  
26  
27 in routine clinical practice and the post-discharge management of patients with CAP.  
28  
29

30  
31  
32 **Contributors** Jia Luo, Wen Tang, Ying Sun, and Chun-Yan Jiang contributed to the  
33  
34 conception and design of this study. Jia Luo and Wen Tang contributed to data  
35  
36 collection. Wen Tang, Ying Sun, and Chun-Yan Jiang contributed to analyses and  
37  
38 interpretation. Jia Luo and Wen Tang contributed to the preparation of the manuscript.  
39  
40  
41 The final version of the article was approved by all the authors.  
42  
43  
44

45  
46 **Funding sources:** This work was supported by the Beijing Municipal Administration  
47  
48 of Hospitals Clinical Medicine Development of Special Funding Support, Code:  
49  
50 ZYLX201838, and the Beijing Friendship Hospital of Capital Medical University  
51  
52 Hospital Startup Funding, Code: yyqdk2017-37.  
53  
54

55  
56  
57 **Competing interests:** None declared.  
58

59  
60 **Ethical approval:** This study was approved by the ethics committee of Beijing

1  
2  
3  
4 Friendship Hospital, Capital Medical University and conducted according to the  
5  
6 principles of the Declaration of Helsinki (project number: 2018-P2-138-01). All patients  
7  
8 provided informed consent before the commencement of the study.  
9  
10

11  
12 **Data sharing statement:** Data could be shared after consultation with the author, E-  
13  
14 mail: ann1121112@sina.com.  
15  
16

## 17 18 19 References

20  
21  
22 [1] Prina E, Ranzani OT, Torres A. Community-acquired pneumonia. Lancet.  
23  
24 2015;386(9998):1097-108.  
25  
26

27  
28 [2] Song JH, Huh K, Chung DR. Community-Acquired Pneumonia in the Asia-Pacific  
29  
30 Region. Semin Respir Crit Care Med. 2016;37(6):839-54.  
31  
32

33  
34 [3] Chalmers J, Campling J, Ellsbury G, et al. Community-acquired pneumonia in the  
35  
36 United Kingdom: a call to action. Pneumonia (Nathan). 2017; 9:15.  
37  
38

39  
40 [4] Cilloniz C, Rodriguez-Hurtado D, Torres A. Characteristics and Management of  
41  
42 Community-Acquired Pneumonia in the Era of Global Aging. Med Sci (Basel).  
43  
44 2018;6(2):35.  
45  
46

47  
48 [5] Jain S, Self WH, Wunderink RG, et al. Community-Acquired Pneumonia Requiring  
49  
50 Hospitalization among U.S. Adults[J]. N Engl J Med,2015,373(5):415-427.  
51  
52

53  
54 [6] Cao B, Huang Y, She DY, et al. Diagnosis and treatment of community-acquired  
55  
56 pneumonia in adults: 2016 clinical practice guidelines by the Chinese Thoracic Society,  
57  
58 Chinese Medical Association. Clin Respir J. 2018;12(4):1320-60.  
59  
60

1  
2  
3  
4 [7] Almirall J, Serra-Prat M, Bolibar I, et al. Risk Factors for Community-Acquired  
5  
6 Pneumonia in Adults: A Systematic Review of Observational Studies. *Respiration*.  
7  
8 2017;94(3):299-311.  
9

10  
11  
12 [8] Yeo HJ, Byun KS, Han J, et al. Prognostic significance of malnutrition for long-term  
13  
14 mortality in community-acquired pneumonia: a propensity score matched analysis.  
15  
16 *Korean J Intern Med*. 2019;34(4):841-9.  
17  
18

19  
20  
21 [9] Cilloniz C, Polverino E, Ewig S, et al. Impact of age and comorbidity on cause and  
22  
23 outcome in community-acquired pneumonia. *Chest*. 2013;144(3):999-1007.  
24  
25

26  
27 [10] Klausen HH, Petersen J, Lindhardt T, et al. Outcomes in elderly Danish citizens  
28  
29 admitted with community-acquired pneumonia. Regional differences, in a public  
30  
31 healthcare system. *Respir Med*. 2012;106(12):1778-87.  
32  
33

34  
35 [11] Hoogendijk EO, Afilalo J, Ensrud KE, et al. Frailty: implications for clinical practice  
36  
37 and public health. *Lancet*. 2019;394(10206):1365-75.  
38  
39

40  
41 [12] Chang SF, Lin PL. Frail phenotype and mortality prediction: a systematic review  
42  
43 and meta-analysis of prospective cohort studies. *Int J Nurs Stud*. 2015;52(8):1362-  
44  
45 1374.  
46  
47

48  
49 [13] Dent E, Martin FC, Bergman H, et al. Management of frailty: opportunities,  
50  
51 challenges, and future directions. *Lancet*. 2019,394(10206): 1376-1386.  
52  
53

54  
55 [14] Costa D, Aladio M, Girado C A, et al. Frailty is independently associated with 1-  
56  
57 year mortality after hospitalization for acute heart failure. *Int J Cardiol Heart Vasc*.  
58  
59  
60

1  
2  
3  
4 2018;7(21):103-106.  
5

6  
7 [15] Walker SR, Gill K, Macdonald K, et al. Association of frailty and physical function  
8 in patients with non-dialysis CKD: a systematic review. *BMC Nephrol.* 2013; 14:228.  
9

10  
11 [16] Flaatten H, De Lange DW, Morandi A, et al. The impact of frailty on ICU and 30-  
12 Day mortality and the level of care in very elderly patients ( $\geq 80$  Years). *Intensive Care*  
13 *Med.* 2017;43(12): 1820–1828.  
14  
15

16  
17 [17] Millett ER, De Stavola BL, Quint JK, et al. Risk factors for hospital admission in  
18 the 28 days following a community-acquired pneumonia diagnosis in older adults, and  
19 their contribution to increasing hospitalization rates over time: a cohort study. *BMJ*  
20 *Open.* 2015;5(12): e008737.  
21  
22

23  
24 [18] Pilotto A, Dini S, Daragjati J, et al. Combined use of the multidimensional  
25 prognostic index (MPI) and procalcitonin serum levels in predicting 1-month mortality  
26 risk in older patients hospitalized with community-acquired pneumonia (CAP): a  
27 prospective study. *Aging Clin Exp Res.* 2018;30(2):193-197.  
28  
29

30  
31 [19] Mandell LA, Wunderink RG, Anzueto A, et al. Infectious Diseases Society of  
32 America/American Thoracic Society consensus guidelines on the management of  
33 community-acquired pneumonia in adults. *Clin Infect Dis.* 2007;44 Suppl 2:S27-72.  
34  
35

36  
37 [20] Fried LP, Tangen CM, Walston J, et al. Frailty in older adults: evidence for a  
38 phenotype. *J Gerontol A Biol Sci Med Sci.* 2001;56(3):M146-56.  
39  
40

41  
42 [21] Charlson ME, Pompei P, Ales KL, et al. A new method of classifying prognostic  
43  
44  
45  
46  
47  
48  
49  
50  
51  
52  
53  
54  
55  
56  
57  
58  
59  
60

1  
2  
3  
4 comorbidity in longitudinal studies: development and validation. *J Chronic Dis.*  
5  
6 1987;40(5):373-83.  
7

8  
9  
10 [22] Mahoney FI, Barthel DW. Functional Evaluation: The Barthel Index. *Md State Med*  
11  
12 *J.* 1965;14:61–5.  
13

14  
15  
16 [23] Rubenstein LZ, Harker JO, Salvà A, et al. Screening for undernutrition in geriatric  
17  
18 practice: developing the short-form mini-nutritional assessment (MNA-SF). *J Gerontol*  
19  
20 *A Biol Sci Med Sci.* 2001 Jun;56(6):M366-72.  
21  
22

23  
24 [24] Luna CM, Palma I, Niederman MS, et al. The Impact of Age and Comorbidities on  
25  
26 the Mortality of Patients of Different Age Groups Admitted with Community-acquired  
27  
28 Pneumonia. *Ann Am Thorac Soc.* 2016;13(9):1519-26.  
29  
30

31  
32 [25] Weir DL, Majumdar SR, McAlister FA, et al. The impact of multimorbidity on short-  
33  
34 term events in patients with community-acquired pneumonia: prospective cohort study.  
35  
36 *Clin Microbiol Infect.* 2015;21(3):264 e7-e13.  
37  
38

39  
40 [26] Chen J, Chang S, Liu J, et al. Comparison of clinical characteristics and  
41  
42 performance of pneumonia severity score and CURB-65 among younger adults,  
43  
44 elderly and very old subjects. *Thorax.* 2010;65(11): 971-977.  
45  
46  
47

48  
49 [27] Simonetti AF, Viasus D, Garcia-Vidal C, Carratala J. Management of community-  
50  
51 acquired pneumonia in older adults. *Ther Adv Infect Dis.* 2014;2(1):3-16.  
52  
53

54  
55 [28] Morley JE, Vellas B, van Kan GA, et al. Frailty consensus: a call to action. *J Am*  
56  
57 *Med Dir Assoc.* 2013;14(6):392-7.  
58  
59  
60

1  
2  
3  
4 [29] Dent E, Martin FC, Bergman H, et al. Management of frailty: opportunities,  
5 challenges, and future directions. *Lancet*. 2019;394(10206): 1376-1386.  
6  
7

8  
9  
10 [30] Collard RM, Boter H, Schoevers RA, et al. Prevalence of frailty in community-  
11 dwelling older persons: a systematic review. *J Am Geriatr Soc*. 2012;60(8):1487-92.  
12  
13

14  
15  
16 [31] Lorenzo-Lopez L, Maseda A, de Labra C, et al. Nutritional determinants of frailty  
17 in older adults: A systematic review. *BMC Geriatr*. 2017;17(1):108.  
18  
19

20  
21  
22 [32] Jeejeebhoy KN. Malnutrition, fatigue, frailty, vulnerability, sarcopenia and  
23 cachexia: overlap of clinical features. *Curr Opin Clin Nutr Metab Care*. 2012;15(3):213-  
24  
25  
26  
27  
28  
29  
30  
31  
32  
33  
34  
35  
36  
37  
38  
39  
40  
41  
42  
43  
44  
45  
46  
47  
48  
49  
50  
51  
52  
53  
54  
55  
56  
57  
58  
59  
60

[33] Yeo HJ, Byun KS, Han J, et al. Prognostic significance of malnutrition for long-  
term mortality in community-acquired pneumonia: a propensity score matched analysis.  
*Korean J Intern Med*. 2019;34(4): 841-849.

[34] Washio M, Kondo K, Fujisawa N, et al. Hypoalbuminemia, influenza vaccination  
and other factors related to the development of pneumonia acquired outside hospitals  
in southern Japan: A case-control study. *Geriatr Gerontol Int*. 2016;16(2): 223-229.

[35] Laur CV, McNicholl T, Valaitis R, et al. Malnutrition or frailty? Overlap and  
evidence gaps in the diagnosis and treatment of frailty and malnutrition. *Appl Physiol  
Nutr Metab*. 2017;42(5):449-58.

[36] Falguera M, Ramírez MF. Community-acquired pneumonia. *Rev Clin Esp*.  
2015;215(8):458-467.

1  
2  
3  
4 [37] Gilbert DN. Procalcitonin as a biomarker in respiratory tract infection. Clin Infect  
5  
6 Dis. 2011;52 Suppl 4: S346–50.  
7  
8

9  
10 [38] Heppner HJ, Bertsch T, Alber B. Procalcitonin: inflammatory biomarker for  
11  
12 assessing the severity of community-acquired pneumonia-a clinical observation in  
13  
14 geriatric patients. Gerontology. 2010;56(4):385–9.  
15  
16

17  
18 [39] Hepper HJ, Sieber C, Walger P, et al. Infections in the Elderly. Crit Care Clin.  
19  
20 2013;29(3):757-74.  
21  
22

23  
24 [40] Thiem U, Niklaus D, Sehlhoff B, et al. C-reactive protein, severity of pneumonia  
25  
26 and mortality in elderly, hospitalised patients with community-acquired pneumonia.  
27  
28 Age Ageing. 2009;38(6):693-7.  
29  
30

31  
32 [41] Weiskopf D, Weinberger B, Grubeck-Loebenstein B. The aging of the immune  
33  
34 system. Transpl Int. 2009, 22(11):1041–1050.  
35  
36

37  
38 [42] Lim WS, Baudouin SV, George RC, et al. BTS guidelines for the management of  
39  
40 community acquired pneumonia in adults: update 2009. Thorax. 2009; 64(Suppl 3):  
41  
42 iii1–55.  
43  
44  
45

46  
47 [43] Schoevaerds D, Sibille FX, Gavazzi G. Infections in the older population: what do  
48  
49 we know? Aging Clin Exp Res. 2019 Oct 26.  
50  
51

52  
53 [44] Choi JY, Kim SW, Yoon SJ et al. Impact of frailty on do-not-resuscitate orders and  
54  
55 healthcare transitions among elderly Koreans with pneumonia. Clin Interv Aging.  
56  
57 2018;1(13):2237-2245.  
58  
59  
60

1  
2  
3  
4 [45] Gonzalez-Castillo J, Martin-Sanchez FJ, Llinares P, Menendez R, Mujal A, Navas  
5  
6 E, et al. Guidelines for the management of community-acquired pneumonia in the  
7  
8 elderly patient. Rev Esp Quimioter. 2014;27(1):69-86.  
9

10  
11  
12 [46] Rubenstein LZ, Stuck AE, Siu AL, et al. Impacts of geriatric evaluation and  
13  
14 management programs on defined outcomes: overview of the evidence. J Am Geriatr  
15  
16 Soc. 1991;39(9 Pt 2):8S-16S; discussion 7S-8S.  
17  
18  
19



Table 1. Characteristics of the study population by frail group at baseline

| Characteristics                    | Total               | Non-frail           | Frail†              | P values |
|------------------------------------|---------------------|---------------------|---------------------|----------|
| N (%)                              | 256                 | 85 (33.2)           | 171 (66.8)          |          |
| Age median (IQR)                   | 86 (81, 90)         | 83 (75, 87)         | 88 (84, 91)         | <0.001*  |
| Sex, n (%)                         |                     |                     |                     |          |
| Female                             | 76 (29.7)           | 17 (20.0)           | 59 (34.5)           | 0.017*   |
| Male                               | 180 (70.3)          | 68 (80.0)           | 112 (65.5)          |          |
| Smoking status                     |                     |                     |                     |          |
| Current-smoker                     | 29 (11.3)           | 11 (12.9)           | 18 (10.5)           | 0.288    |
| Ex-smoker                          | 71 (27.7)           | 28 (32.9)           | 43 (25.1)           |          |
| Non-smoker                         | 156 (60.9)          | 46 (54.1)           | 110 (64.3)          |          |
| BMI (kg/m <sup>2</sup> ) mean (SD) | 22.9 (4.3)          | 24.2 (3.8)          | 22.3 (4.4)          | 0.001*   |
| Barthel Index median (IQR)         | 65 (40, 95)         | 95 (85, 100)        | 50 (20, 70)         | <0.001*  |
| CCI median (IQR)                   | 4 (3, 5)            | 3 (2, 4)            | 4 (3, 6)            | <0.001*  |
| MNA-SF median (IQR)                | 10 (7, 12)          | 12 (11, 14)         | 9 (7, 11)           | <0.001*  |
| Malnutrition n(%)§                 | 71 (27.7)           | 6 (7.1)             | 65 (38.0)           |          |
| SCAP‡, n (%)                       | 57 (22.3)           | 8 (9.41)            | 49 (28.65)          | <0.001*  |
| PCT (ng/ml) median (IQR)           | 0.28 (0.21, 0.44)   | 0.27 (0.20, 0.37)   | 0.29 (0.21, 0.55)   | 0.149    |
| hs-CRP (mg/L) median (IQR)         | 25.89 (5.79, 61.41) | 19.63 (4.19, 54.29) | 27.08 (7.56, 62.43) | 0.129    |

|                                        |                    |                   |                    |         |
|----------------------------------------|--------------------|-------------------|--------------------|---------|
| WBC (*10 <sup>9</sup> /L) median (IQR) | 7.65 (5.57, 11.06) | 7.02 (5.64,9.01)  | 8.02 (5.51, 12.33) | 0.043*  |
| HGB (g/L) median (IQR)                 | 121 (108, 133)     | 127 (120, 136)    | 115 (100,128)      | <0.001* |
| Scr (umol/L) median (IQR)              | 76.9 (61.6, 96.8)  | 78.6 (67.4, 90.5) | 75.2 (59.5, 101.6) | 0.720   |
| BUN (mmol/L) median (IQR)              | 5.98 (4.58, 7.94)  | 5.99 (4.30, 7.01) | 5.98 (4.79, 8.65)  | 0.039*  |
| ALT (U/L) median (IQR)                 | 14 (10, 22)        | 15 (11, 22)       | 13 (10, 21)        | 0.058   |
| ALB (g/L) mean (SD)                    | 32.46 (4.39)       | 34.38 (4.22)      | 31.50 (4.16)       | <0.001* |
| PA (g/L) mean (SD)                     | 16.92 (6.19)       | 18.74 (6.41)      | 15.98 (5.88)       | 0.001*  |
| 30-day mortality, n (%)                | 14 (5.5)           | 0 (0)             | 14 (8.19)          | 0.015*  |
| 1-year mortality, n (%)                | 43 (16.8)          | 0 (0)             | 43 (25.15)         | <0.001* |

Abbreviations: SD, standard deviation; IQR, inter-quartile range; BMI, Body Mass Index; CCI, Charlson's Comorbidity Index; MNA-SF, Mini Nutritional Assessment-Short Form; SCAP, severe community acquired pneumonia; PCT, procalcitonin; hs-CRP, high sensitivity C-reactive protein; WBC, the leukocyte count; HGB, hemoglobin; BUN, blood urea nitrogen; Scr, serum creatinine; ALT, alanine aminotransferase; ALB, albumin; PA, prealbumin.

\* P values < 0.05.

† Frail: defined by Fried Phenotype score  $\geq$  3.

‡ SCAP: defined by the IDSA/ATS criteria (2007).

§ Malnutrition: defined by MNA-SF scores  $\leq$  7.

Table 2. Significant risk factors for 30-day mortality in patients with CAP in COX proportional hazards regression analyses (n =256)

| Variable          | Univariate |             |         | Multivariate |             |         |
|-------------------|------------|-------------|---------|--------------|-------------|---------|
|                   | HR         | 95%CI       | P-Value | HR           | 95%CI       | P-Value |
| SCAP              | 52.01      | 6.80-398.09 | <0.001  | 30.60        | 3.77-248.06 | 0.001   |
| Malnutrition<br>n | 0.84       | 0.73-0.97   | 0.015   | 1.11         | 0.90-1.35   | 0.330   |
| Frail             | 2.58       | 1.42-4.69   | 0.002   | 1.83         | 0.88-3.81   | 0.108   |
| CCI               | 1.41       | 1.19-1.67   | <0.001  | 1.19         | 0.99-1.43   | 0.069   |

Data are shown as estimated HR (95% CIs) of the explanatory variables in the 30-day mortality group. Adjusted for: age, sex, disability, malnutrition, comorbidities, and the severity of CAP.

Abbreviations: HR, hazards ratio; CI, confidence interval; CCI, Charlson's Comorbidity Index; SCAP, severe community acquired pneumonia.

Table 3. Significant risk factors for 1-year mortality in patients with CAP in COX proportional hazards regression analyses (n =256)

| Variable     | Univariate |            |         | Multivariate |            |         |
|--------------|------------|------------|---------|--------------|------------|---------|
|              | HR         | 95%CI      | P-Value | HR           | 95%CI      | P-Value |
| SCAP         | 13.32      | 6.81-26.04 | <0.001  | 7.68         | 3.79-15.58 | <0.001  |
| BI           | 0.98       | 0.97-0.99  | <0.001  | 1.01         | 0.99-1.02  | 0.352   |
| BMI          | 0.93       | 0.87-1.00  | 0.038   | 1.07         | 0.98-1.16  | 0.128   |
| Malnutrition | 0.78       | 0.72-0.85  | <0.001  | 0.94         | 0.81-1.10  | 0.424   |
| Frail        | 3.41       | 2.32-5.03  | <0.001  | 2.70         | 1.69-4.39  | <0.001  |
| CCI          | 1.40       | 1.26-1.55  | <0.001  | 1.19         | 1.05-1.34  | <0.001  |

Data are shown as estimated HR (95% CIs) of the explanatory variables in the 1-year mortality group. Adjusted for: age, sex, disability, malnutrition, comorbidities, and the severity of CAP.

Abbreviations: HR, hazards ratio; CI, confidence interval; SCAP, severe community acquired pneumonia; BI, Barthel Index; BMI, Body Mass Index; CCI, Charlson's Comorbidity Index.

Table 4. Characteristics of SCAP<sup>‡</sup> stratified by frail group

| Characteristics                     | Non-frail            | Frail <sup>†</sup>   | P values |
|-------------------------------------|----------------------|----------------------|----------|
| N, n (%)                            | 8 (14.0)             | 49 (86.0)            |          |
| Age median (IQR)                    | 85 (82, 91)          | 89 (81, 92)          | 0.581    |
| Sex, n (%)                          |                      |                      |          |
| Female                              | 0 (0)                | 11 (22.5)            | 0.053    |
| Male                                | 8 (100.0)            | 38 (77.6)            |          |
| BMI (kg/m <sup>2</sup> ) mean (SD)  | 22.95 (2.56)         | 21.59 (4.81)         | 0.249    |
| Barthel Index median (IQR)          | 88 (59, 99)          | 35 (8, 68)           | 0.001*   |
| CCI median (IQR)                    | 4 (2, 5)             | 5 (3, 8)             | 0.129    |
| MNA-SF mean (SD)                    | 11 (3)               | 7 (3)                | 0.003*   |
| PCT (ng/ml) median (IQR)            | 0.30 (0.21, 0.40)    | 0.31 (0.23, 1.74)    | 0.477    |
| hs-CRP (mg/L) median (IQR)          | 33.52 (3.65, 154.94) | 34.42 (19.08, 89.78) | 0.928    |
| WBC (*10 <sup>9</sup> /L) mean (SD) | 8.45 (2.53)          | 10.83 (5.27)         | 0.218    |
| HGB (g/L) median (IQR)              | 122 (106, 146)       | 114 (93,123)         | 0.179    |
| Scr (umol/L) median (IQR)           | 103.5 (88.5, 121.1)  | 82.6 (62.1, 114.8)   | 0.161    |
| BUN (mmol/L) median (IQR)           | 8.35 (6.86, 9.49)    | 7.98 (5.67, 12.07)   | 0.730    |
| ALT (U/L) median (IQR)              | 16 (10, 27)          | 13 (10, 20)          | 0.557    |
| ALB (g/L) median (IQR)              | 33.10 (31.75, 34.38) | 30.00 (27.35, 32.85) | 0.039*   |
| PA (g/L) mean (SD)                  | 18.56 (9.60)         | 14.44 (5.85)         | 0.118    |
| 30-day mortality, n (%)             | 0(0)                 | 13(26.53)            | 0.034*   |
| 1-year mortality, n (%)             | 0(0)                 | 31(63.27)            | <0.001*  |

Abbreviations: SD, standard deviation; IQR, inter-quartile range; BMI, Body Mass Index; CCI, Charlson's Comorbidity Index; MNA-SF, Mini Nutritional Assessment-Short Form; SCAP, severe community acquired pneumonia; PCT, procalcitonin; hs-CRP, high sensitivity C-reactive protein; WBC, the leukocyte count; HGB, hemoglobin;

1  
2  
3 BUN, blood urea nitrogen; Scr, serum creatinine; ALT, alanine aminotransferase; ALB,  
4 albumin; PA, prealbumin.  
5

6 \* P values < 0.05.  
7

8 † Frail: defined by Fried Phenotype score  $\geq$  3.  
9

10 ‡ SCAP: defined by the IDSA/ATS criteria (2007).  
11  
12  
13  
14  
15  
16  
17  
18  
19  
20  
21  
22  
23  
24  
25  
26  
27  
28  
29  
30  
31  
32  
33  
34  
35  
36  
37  
38  
39  
40  
41  
42  
43  
44  
45  
46  
47  
48  
49  
50  
51  
52  
53  
54  
55  
56  
57  
58  
59  
60

For peer review only

Table 5. Significant risk factors for 1-year mortality in patients with SCAP in COX proportional hazards regression analyses (n =57)

| Variable     | Univariate |           |                 | Multivariate |           |                 |
|--------------|------------|-----------|-----------------|--------------|-----------|-----------------|
|              | HR         | 95%CI     | <i>P</i> -Value | HR           | 95%CI     | <i>P</i> -Value |
| BI           | 0.99       | 0.98-1.00 | 0.046           | 1.00         | 0.99-1.02 | 0.875           |
| Malnutrition | 0.86       | 0.77-0.97 | 0.010           | 1.05         | 0.89-1.25 | 0.545           |
| n            |            |           |                 |              |           |                 |
| Frail        | 2.82       | 1.70-4.68 | <0.001          | 2.870        | 1.58-4.96 | <0.001          |
| CCI          | 1.24       | 1.10-1.40 | 0.001           | 1.16         | 1.01-1.34 | 0.034           |

Data are shown as estimated HR (95% CIs) of the explanatory variables in the 1-year mortality group. Adjusted for: age, sex, disability, malnutrition, and comorbidities.

Abbreviations: HR, hazards ratio; CI, confidence interval; SCAP, severe community acquired pneumonia; BI, Barthel Index; CCI, Charlson's Comorbidity Index.

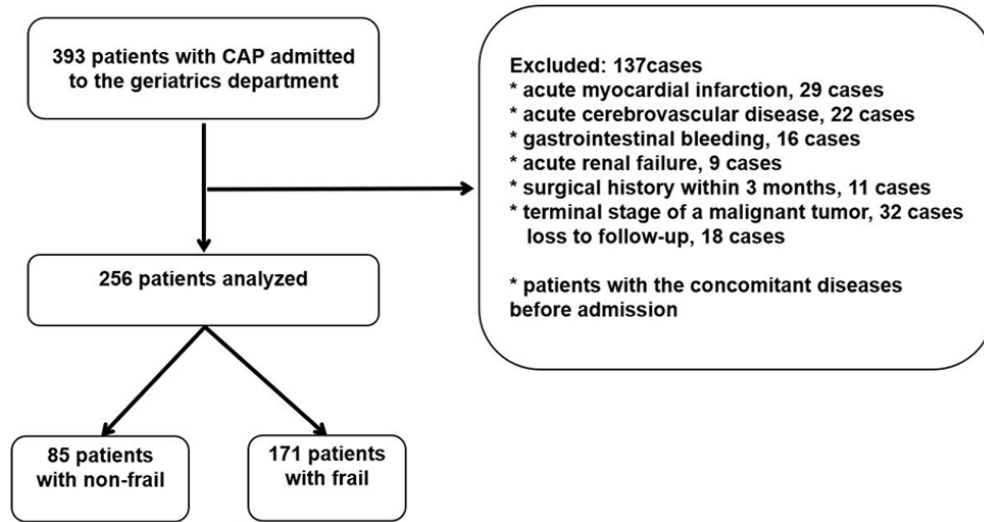

Figure 1. Flow chart of the study population



# BMJ Open

## Impact of frailty on 30-day and 1-year mortality in hospitalized elderly patients with community-acquired pneumonia: a prospective observational study

|                                 |                                                                                                                                                                                                                                                                                                                                                                                                                                       |
|---------------------------------|---------------------------------------------------------------------------------------------------------------------------------------------------------------------------------------------------------------------------------------------------------------------------------------------------------------------------------------------------------------------------------------------------------------------------------------|
| Journal:                        | <i>BMJ Open</i>                                                                                                                                                                                                                                                                                                                                                                                                                       |
| Manuscript ID                   | bmjopen-2020-038370.R2                                                                                                                                                                                                                                                                                                                                                                                                                |
| Article Type:                   | Original research                                                                                                                                                                                                                                                                                                                                                                                                                     |
| Date Submitted by the Author:   | 05-Aug-2020                                                                                                                                                                                                                                                                                                                                                                                                                           |
| Complete List of Authors:       | luo, jia; Capital Medical University Affiliated Beijing Friendship Hospital, Geriatric department;<br>Tang, Wen; Capital Medical University Affiliated Beijing Friendship Hospital, Department of Geriatrics<br>Ying, Sun; Capital Medical University Affiliated Beijing Friendship Hospital, Department of Geriatrics<br>Jiang, Chunyan; Capital Medical University Affiliated Beijing Friendship Hospital, Department of Geriatrics |
| <b>Primary Subject Heading</b>: | Geriatric medicine                                                                                                                                                                                                                                                                                                                                                                                                                    |
| Secondary Subject Heading:      | Respiratory medicine, Medical management, Infectious diseases                                                                                                                                                                                                                                                                                                                                                                         |
| Keywords:                       | GERIATRIC MEDICINE, INTERNAL MEDICINE, Respiratory infections < THORACIC MEDICINE, RESPIRATORY MEDICINE (see Thoracic Medicine)                                                                                                                                                                                                                                                                                                       |
|                                 |                                                                                                                                                                                                                                                                                                                                                                                                                                       |

SCHOLARONE™  
Manuscripts



I, the Submitting Author has the right to grant and does grant on behalf of all authors of the Work (as defined in the below author licence), an exclusive licence and/or a non-exclusive licence for contributions from authors who are: i) UK Crown employees; ii) where BMJ has agreed a CC-BY licence shall apply, and/or iii) in accordance with the terms applicable for US Federal Government officers or employees acting as part of their official duties; on a worldwide, perpetual, irrevocable, royalty-free basis to BMJ Publishing Group Ltd ("BMJ") its licensees and where the relevant Journal is co-owned by BMJ to the co-owners of the Journal, to publish the Work in this journal and any other BMJ products and to exploit all rights, as set out in our [licence](#).

The Submitting Author accepts and understands that any supply made under these terms is made by BMJ to the Submitting Author unless you are acting as an employee on behalf of your employer or a postgraduate student of an affiliated institution which is paying any applicable article publishing charge ("APC") for Open Access articles. Where the Submitting Author wishes to make the Work available on an Open Access basis (and intends to pay the relevant APC), the terms of reuse of such Open Access shall be governed by a Creative Commons licence – details of these licences and which [Creative Commons](#) licence will apply to this Work are set out in our licence referred to above.

Other than as permitted in any relevant BMJ Author's Self Archiving Policies, I confirm this Work has not been accepted for publication elsewhere, is not being considered for publication elsewhere and does not duplicate material already published. I confirm all authors consent to publication of this Work and authorise the granting of this licence.

1 Impact of frailty on 30-day and 1-year mortality in hospitalized elderly patients with  
2 community-acquired pneumonia: a prospective observational study

3 Jia Luo, MD; Wen Tang\*, MD, PhD; Ying Sun, MD, PhD; Chun-Yan Jiang, MD, PhD.

4 Department of Geriatrics, Beijing Friendship Hospital, Capital Medical University,  
5 Beijing, 100050, People's Republic of China

6 **Corresponding Author:** Wen Tang, MD, PhD. Department of Geriatrics, Beijing  
7 Friendship Hospital, Capital Medical University. Postal address: No. 95, Yong'an Road,  
8 Xicheng District, Beijing 100050, PR China. Email: twybx@163.com. Tel: + (86  
9 10) 63137642 / +86 15810683607. Fax: + (86 10) 63138795.

10 **The first author:** Jia Luo, MD; Department of Geriatrics, Beijing Friendship Hospital,  
11 Capital Medical University. E-mail: ann11121112@sina.com.

12 **The co-authors:** Ying Sun, MD, PhD; Department of Geriatrics, Beijing Friendship  
13 Hospital, Capital Medical University. E-mail: ysun15@163.com.

14 Chun-Yan Jiang, MD, PhD; Department of Geriatrics, Beijing Friendship Hospital,  
15 Capital Medical University. E-mail: jchy12368@sina.com.

16 **Short title:** Impact of frailty on community-acquired pneumonia

17 **Word count:** Abstract—291; Manuscript--2364

18 **Keywords:** Community-acquired pneumonia; Frailty; Elderly; Prognosis.

19

1  
2  
3  
4  
5  
6  
7  
8  
9  
10  
11  
12  
13  
14  
15  
16  
17  
18  
19  
20  
21  
22  
23  
24  
25  
26  
27  
28  
29  
30  
31  
32  
33  
34  
35  
36  
37  
38  
39  
40  
41  
42  
43  
44  
45  
46  
47  
48  
49  
50  
51  
52  
53  
54  
55  
56  
57  
58  
59  
60

1

For peer review only

1  
2  
3  
4 **1 Abstract**  
5

6  
7 **2 Objectives:** This study evaluates the impact of frailty, which is a state of increased  
8  
9  
10  
11  
12  
13  
14  
15  
16  
17  
18  
19  
20  
21  
22  
23  
24  
25  
26  
27  
28  
29  
30  
31  
32  
33  
34  
35  
36  
37  
38  
39  
40  
41  
42  
43  
44  
45  
46  
47  
48  
49  
50  
51  
52  
53  
54  
55  
56  
57  
58  
59  
60  
**3** vulnerability to stressors, on 30-day and 1-year mortality among elderly patients with  
**4** community-acquired pneumonia (CAP). The main hypothesis is that frailty is an  
**5** independent predictor of prognosis in elderly CAP patients.

**6 Design:** Prospective, observational, follow-up cohort study.

**7 Setting:** A 2000-bed tertiary care hospital in Beijing, China.

**8 Participants:** Consecutive CAP patients aged  $\geq 65$  years admitted to the geriatric  
9  
10  
11  
12  
13  
14  
15  
16  
17  
18  
19  
20  
21  
22  
23  
24  
25  
26  
27  
28  
29  
30  
31  
32  
33  
34  
35  
36  
37  
38  
39  
40  
41  
42  
43  
44  
45  
46  
47  
48  
49  
50  
51  
52  
53  
54  
55  
56  
57  
58  
59  
60  
**9** department of our hospital between September 2017 and February 2019.

**10 Main outcome measures:** The primary outcomes were all-cause mortality at 30 days  
11  
12  
13  
14  
15  
16  
17  
18  
19  
20  
21  
22  
23  
24  
25  
26  
27  
28  
29  
30  
31  
32  
33  
34  
35  
36  
37  
38  
39  
40  
41  
42  
43  
44  
45  
46  
47  
48  
49  
50  
51  
52  
53  
54  
55  
56  
57  
58  
59  
60  
**11** and 1 year after hospital admission. The impact of frailty (defined by Frailty Phenotype)  
**12** on 30-day and 1-year mortality of elderly patients with CAP was assessed by Cox  
**13** regression analysis.

**14 Results:** The cohort included 256 patients. The median (IQR) age was 86 (81, 90)  
15  
16  
17  
18  
19  
20  
21  
22  
23  
24  
25  
26  
27  
28  
29  
30  
31  
32  
33  
34  
35  
36  
37  
38  
39  
40  
41  
42  
43  
44  
45  
46  
47  
48  
49  
50  
51  
52  
53  
54  
55  
56  
57  
58  
59  
60  
**15** years, and 180 (70.3%) participants were men. A total of 171/256 (66.8%) patients  
**16** were frail. The prevalence of frailty was significantly associated with older age, female  
**17** gender, lower BMI, comorbidities, limitations in activities of daily living, and poor  
**18** nutritional status. Frail participants were significantly more likely to have severe CAP  
**19** than non-frail counterparts (28.65% vs. 9.41%,  $P < 0.001$ ). The 1-year mortality risk was  
**20** approximately three-fold higher in frail patients (adjusted HR, 2.70; 95% CI, 1.69-4.39)

1 than non-frail patients. Subgroup analysis of patients with severe CAP showed that the  
2 1-year mortality risk was approximately three-fold higher in the frail group (adjusted  
3 HR, 2.87; 95% CI, 1.58-4.96) than in the non-frail group. The association between  
4 frailty and 30-day mortality was not significant.

5 **Conclusions:** These findings suggest that frailty is strongly associated with severe  
6 CAP and higher 1-year mortality in elderly patients with CAP, and frailty should be  
7 detected early to improve the management of these patients.

8 **Keywords:** Community-acquired pneumonia; Frailty; Elderly; Prognosis.

#### 9 **Strengths and limitations of this study**

- 10 1. This study evaluated frailty in elderly patients with community-acquired pneumonia  
11 (CAP).
- 12 2. The study analyzed the correlation between prognostic factors (age, disability,  
13 malnutrition, comorbidities, and CAP severity) and frailty by multivariate regression  
14 analysis and showed that frailty affected the prognosis of CAP.
- 15 3. Frailty was defined by Fried's Frailty Phenotype, which is well validated and simple  
16 to use.
- 17 4. The study was conducted in a single center and evaluated a small number of end-  
18 points.
- 19 5. The study included a small sample of older patients and did not evaluate the  
20 association between frailty and CAP in outpatients.

## 1 Introduction

2 Community-acquired pneumonia (CAP) is the most prevalent infectious disease in  
3 the elderly and is associated with high rates of mortality, morbidity, and high costs  
4 worldwide.<sup>[1, 2, 3, 4]</sup> In the United States, the incidence of CAP in the age group 65–79  
5 years is 63 cases per 10,000 adults and increases to 164.3 cases per 10,000 adults in  
6 the age group >80 years.<sup>[5]</sup> Mortality from CAP increases with age. In 2012, the  
7 average mortality from pneumonia was 17.46 cases per 100,000 in all age groups in  
8 China, 23.55 cases per 100,000 in the age group 65–69 years, and nearly 36 times  
9 higher in the age group >85 years.<sup>[6]</sup>

10 Studies have shown that age, functional status, comorbidities, and malnutrition are  
11 strongly associated with poor prognosis in CAP patients,<sup>[4,6,7,8,9,10]</sup> and higher mortality  
12 in elderly patients with CAP underscores the need to identify novel, modifiable risk  
13 factors for poor outcomes. Particular attention has recently been directed to frail elderly  
14 patients. Frailty is associated with disabilities, comorbidities, and old age and is defined  
15 as a cumulative decline in multiple organ systems and loss of physiological reserves,  
16 increasing the vulnerability to adverse outcomes, including falls, hospitalization, and  
17 mortality.<sup>[11,12,13]</sup> Moreover, frailty is an independent risk factor for mortality in patients  
18 with acute and chronic diseases.<sup>[14,15]</sup> A European multicenter study assessed the  
19 impact of frailty (measured by the Clinical Frailty Scale) on intensive care unit (ICU)  
20 admission and 30-day mortality in 5021 elderly patients and observed that frailty was  
21 found in 43% of these patients and was independently related to 30-day survival  
22 (hazard ratio [HR], 1.54; 95% confidence interval [CI], 1.38-1.73, frail versus non-frail

1 patients).<sup>[16]</sup> A study evaluated the relationship between frailty and CAP in older  
2 patients and found that frailty increased hospitalization at 28 days after CAP  
3 diagnosis<sup>[17]</sup> and significantly predicted the risk of 1-month mortality.<sup>[18]</sup> Therefore, we  
4 hypothesized that frailty is positively correlated with CAP severity and mortality in  
5 elderly patients.

6 The objective of this study is to assess the prevalence of frailty in older patients with  
7 CAP, the association between frailty and CAP severity, and 30-day and 1-year  
8 mortality. This information may be useful for the early stratification of high-risk patients  
9 and the hierarchical management of modifiable factors to improve the prognosis of  
10 elderly patients with CAP.

## 11 Methods

### 12 1. Study design

13 We prospectively and consecutively enrolled elderly patients (aged  $\geq 65$  years)  
14 diagnosed with CAP in the geriatric department of our institution from September 2017  
15 to February 2019. The exclusion criteria were complications, such as acute myocardial  
16 infarction, acute cerebrovascular disease, gastrointestinal bleeding, or acute renal  
17 failure; surgical history within 3 months; and terminal stage of a malignant tumor.

18 CAP was defined as pneumonia acquired outside the hospital by an  
19 immunocompetent individual. The criteria for diagnosing CAP were community-onset  
20 and the presence of new infiltrates on chest X-ray or computed tomography scan  
21 together with at least one of the following conditions: (i) new or increased cough



1 (productive, nonproductive, or accompanied by a change in sputum characteristics)  
2 with or without dyspnea, chest pain, or hemoptysis; (ii) fever; (iii) rales and/or signs of  
3 consolidation; (iv) peripheral WBC count  $>10,000$  cells  $\text{mm}^{-3}$  or  $<4000$  cells  $\text{mm}^{-3}$  with  
4 or without an increase in immature forms. Differential diagnosis included tuberculosis,  
5 lung cancer, noninfectious pulmonary interstitial disease, pulmonary edema,  
6 atelectasis, pulmonary embolism, pulmonary eosinophilic infiltration, and pulmonary  
7 vasculitis. The patients with these diagnoses were excluded.<sup>[6]</sup>

## 8 2. Baseline characteristics

9 The following parameters were evaluated within 24 hours of admission: age, sex,  
10 body mass index (BMI), smoking history, procalcitonin (PCT), high-sensitivity C-  
11 reactive protein (hs-CRP), white blood count (WBC), hemoglobin (HGB), alanine  
12 aminotransferase (ALT), albumin (ALB), prealbumin (PA), serum creatinine (Scr), and  
13 blood urea nitrogen (BUN). A comprehensive geriatric assessment (CGA), including  
14 frailty, comorbidities, and functional and nutritional status, was conducted by trained  
15 evaluators within 24 hours of admission.

## 16 3. Severity of CAP

17 Severe CAP (SCAP) was diagnosed according to criteria established by the  
18 Infectious Diseases Society of America and the American Thoracic Society,<sup>[19]</sup> and at  
19 least one major criterion or three minor criteria should be satisfied. The major criteria  
20 were the need for mechanical ventilation or the diagnosis of septic shock. The minor  
21 criteria were respiratory rate  $>130$  breaths/min, arterial oxygen pressure/fraction of

1 inspired oxygen ratio <250 mmHg, multilobar infiltrates, confusion, BUN level >120  
2 mg/dL, leukopenia resulting from infection, thrombocytopenia, hypothermia, or  
3 hypotension requiring aggressive fluid resuscitation.

#### 4 4. Assessment of frailty

5 Frailty was assessed using the following Frailty Phenotype (FP) criteria:  
6 unintentional weight loss (10 lbs in the past 12 months), self-reported exhaustion,  
7 weakness (reduced grip strength), slow walking speed, and low physical activity.<sup>[20]</sup>  
8 The cut-off values were consistent with the original criteria. Each construct was  
9 considered present (score of 1) or absent (score of 0). The total score ranged from 0  
10 to 5. As established previously, the presence and absence of frailty were defined as a  
11 score of  $\geq 3$  and  $\leq 2$ , respectively.

#### 12 5. Covariates

13 Comorbidity was evaluated with the Charlson Comorbidity Index (CCI).<sup>[21]</sup> The CCI  
14 is the sum of the weighted scores of the following chronic medical conditions: ischemic  
15 heart disease, congestive heart failure, cerebrovascular accident, peripheral vascular  
16 diseases, chronic lung diseases, diabetes, dementia, connective tissue diseases, renal  
17 diseases, liver diseases, hemiplegia, solid or hematological malignancy, and acquired  
18 immunodeficiency disease. A score of 1, 2, 3, or 6 is assigned to each disease,  
19 depending on severity.

20 Functional status was assessed by evaluating patients' ability to perform activities  
21 of daily living (ADLs) using the Barthel Index (BI).<sup>[22]</sup>

1           The nutritional status was assessed using the Mini Nutritional Assessment-Short  
2 Form questionnaire.<sup>[23]</sup> This questionnaire evaluates BMI, weight loss in the past 3  
3 months, dietary changes, stress or acute illness, degree of mobility, and  
4 neuropsychiatric diseases. The total score is 14 points, and scores of 0-7 indicate  
5 malnutrition.

## 6 5. Follow-up and outcomes

7           All patients were followed for 1 year after hospital admission. Deaths were  
8 confirmed through surveillance or official death records. The primary outcomes were  
9 all-cause mortality at 30 days and 1 year after admission.

## 10 6. Statistical analysis

11           Statistical analyses were performed using IBM SPSS software version 23.0  
12 (Chicago, USA). Continuous variables were expressed as the means  $\pm$  standard  
13 deviation (SD) or interquartile range (IQR) and compared using Student's t-test or the  
14 Mann-Whitney U test. Categorical variables were compared using the chi-squared test  
15 or Fisher's exact test. The association between baseline frailty status and 30-day and  
16 1-year all-cause mortality was analyzed using univariate and multivariate Cox  
17 proportional hazards regression models, and the results were expressed as hazard  
18 ratio (HR) and 95% confidence interval (CI). A two-tailed p-value of less than 0.05 was  
19 considered to indicate a statistically significant difference.

## 20 Patient and public involvement

1 Patients and the public were not involved in the study design, recruitment, or  
2 execution, and the participants were not be involved in disseminating the results. The  
3 study results will be provided to patients upon request, and aggregated data will be  
4 reported in project reports and research publications and meetings.

## 5 Results

6 In our cohort, 393 older patients with CAP were admitted to our department during  
7 the study period. Of these, 119 patients were excluded because of concomitant  
8 diseases, and 18 were lost to follow-up (Figure 1). A total of 256 patients with CAP  
9 aged 65-99 years were included in the final analysis. Demographic characteristics are  
10 presented in Table 1. The median age of the cohort was 86 (IQR, 81–90) years, and  
11 180 (70.3%) patients were men. A total of 171 (66.8%) participants were frail, 71  
12 (27.7%) patients were malnourished, and 57 (22.3%) participants had SCAP. All-cause  
13 mortality at 30 days and 1 year was 5.5% and 16.8%, respectively.

14 Frailty was significantly associated with older age, female gender, lower BMI,  
15 limitations in ADLs, comorbidities, and poor nutritional status. Frail participants were  
16 significantly more likely to have SCAP than non-frail counterparts (28.65% vs. 9.41%,  
17  $P<0.001$ ). Thirty-day and 1-year mortality was significantly higher in frail patients (0 vs.  
18 8.19%,  $P=0.015$ ; and 0 vs. 25.25%,  $P<0.001$ , respectively). The results of Cox  
19 proportional hazards regression are presented in Table 2. SCAP, frailty, malnutrition,  
20 and CCI were significantly associated with 30-day mortality in the univariate analysis,  
21 but only SCAP remained significant in the multivariate analysis (adjusted HR, 30.60;

1 95% CI, 3.77-248.06). The factors associated with 1-year mortality in the multivariable  
2 analysis were SCAP (adjusted HR, 7.68; 95% CI, 3.79-15.58), frailty (adjusted HR,  
3 2.70; 95% CI, 1.69-4.39), and CCI (adjusted HR, 1.19; 95% CI, 1.05-1.34).

4 Subgroup analysis by frailty status showed that eight (14%) patients were non-frail  
5 and 49 patients (86%) were frail. The frail group presented worse functional and  
6 nutritional status and higher 30-day and 1-year mortality (Supplementary Table). In the  
7 multivariate analysis of patients with SCAP, 1-year mortality risk was approximately  
8 three-fold higher in the frail group (adjusted HR, 2.87; 95% CI, 1.58-4.96) than in the  
9 non-frail group, and 1-year mortality risk was 16% higher among those with more  
10 comorbidities (adjusted HR, 1.16; 95% CI, 1.01-1.34) (Table 3). Only CCI was  
11 significantly correlated with 30-day mortality in the univariate analysis, and none of the  
12 study variables were associated with 30-day mortality in the multivariate analysis.

### 13 Discussion

14 The results showed that frail older patients with CAP were significantly more likely  
15 to have SCAP and had a significantly higher 30-day and 1-year mortality risk than non-  
16 frail patients. In addition, frailty was an independent risk factor for 1-year mortality after  
17 adjusting for age, sex, disability, malnutrition, comorbidities, and CAP severity but was  
18 not an independent risk factor for 30-day mortality.

19 The incidence of CAP increases with age, and CAP increases the risk of morbidity  
20 and mortality. Mortality is significantly higher in elderly patients with CAP than in the  
21 general population.<sup>[4,9]</sup> All-cause mortality at 30 days and 1 year among elderly patients

1  
2  
3  
4 1 with CAP in our cohort was 5.5% and 16.8%, respectively. Known independent  
5  
6 2 prognostic factors for CAP mortality are age, comorbidities, functional status, microbial  
7  
8  
9 3 etiology, and early antibiotic treatment.<sup>[9,10,24,25]</sup> However, some studies reported that  
10  
11 4 age *per se* was not an independent predictor of CAP mortality in the elderly population  
12  
13  
14 5 with pneumonia.<sup>[26,27]</sup> Frailty is an age-related disease associated with disabilities,  
15  
16  
17 6 comorbidities, and advanced age, and is characterized by a decline in physiological  
18  
19  
20 7 functions across multiple organ systems and increased vulnerability to stressors,<sup>[20,28,29]</sup>  
21  
22  
23 8 which increases the risk of adverse health outcomes, including falls, disability,  
24  
25  
26 9 hospitalization, institutionalization, and death. Various conditions, including  
27  
28  
29 10 malnutrition, sarcopenia, gait impairment, chronic inflammation, polypharmacy,  
30  
31  
32 11 cardiovascular changes, and morbidity, may cause frailty. <sup>[30,31,32]</sup> Accordingly, in our  
33  
34  
35 12 sample, all patients who died within 30 days or 1 year were frail.

36 13 Frailty was more prevalent in women, which is consistent with a previous study.<sup>[30]</sup>  
37  
38  
39 14 In addition, frail patients had older age, more comorbidities, poor nutritional and  
40  
41  
42 15 functional status, and limited ability to perform ADLs. Poor nutritional status, including  
43  
44  
45 16 hypoalbuminemia, hypoproteinemia, malnourishment, and a low nutritional score, is a  
46  
47  
48 17 strong predictor of mortality in CAP patients.<sup>[33,34]</sup> However, in our cohort, there was no  
49  
50  
51 18 significant association between nutritional status and 30-day or 1-year mortality in the  
52  
53  
54 19 multivariate analysis (adjusted HR, 1.11; 95% CI, 0.90-1.35; adjusted HR, 0.94; 95%  
55  
56  
57 20 CI, 0.81-1.10, respectively). Some studies have shown that the definition, diagnosis,  
58  
59  
60 21 and treatment of frailty and malnutrition overlap.<sup>[30,32,35]</sup> Malnutrition is a physiological  
22  
condition that predisposes to the occurrence and development of frailty.<sup>[31]</sup> In our study,

1 frailty was defined as a syndrome that affects multiple organ systems and was a strong  
2 predictor of long-term mortality, and this multidimensional nature may explain why  
3 frailty, but not malnutrition and disability, was significantly associated with higher  
4 mortality in the multivariate analysis.

5 Our results indicated that frailty was common in elderly patients with CAP  
6 (prevalence of 66.8%) and was closely linked to disease severity; furthermore, frailty  
7 increased 1-year mortality risk nearly three-fold compared with the absence of frailty  
8 (adjusted HR, 2.70; 95% CI, 1.69-4.39). A study evaluated patient outcomes at 1 year  
9 after the diagnosis of CAP and showed that age  $\geq 65$  years, nursing home residency,  
10 and comorbidity were positively associated with 1-year mortality.<sup>[36]</sup> Another study  
11 found that the risk of CAP mortality was more strongly correlated with underlying  
12 diseases than with CAP severity.<sup>[25]</sup> However, these studies did not assess the effect  
13 of frailty on CAP prognosis. The results of our study demonstrated that frailty was  
14 independently associated with 1-year mortality after adjusting for risk factors,  
15 suggesting that frailty could accurately predict adverse outcomes.

16 Our findings suggest that frail patients are more likely to have SCAP, and frailty is  
17 positively correlated to the risk of 1-year mortality. Since the clinical presentation of  
18 pneumonia may be atypical in the elderly, clinicians should suspect pneumonia in the  
19 presence of symptoms such as falls, altered mental status, fatigue, delirium, and  
20 anorexia to avoid complications associated with delayed diagnosis and therapy.<sup>[37]</sup>  
21 With respect to clinical decision-making and planning of health services, it is important  
22 to identify frailty in elderly CAP patients to better stratify the risk of adverse outcomes

1  
2  
3  
4 1 and implement treatments tailored to individual needs, including invasive diagnostic  
5  
6 2 procedures and therapies and the type of care at the late stage of the disease. A  
7  
8  
9 3 Korean study found that frailty was independently associated with do-not-resuscitate  
10  
11 4 orders and healthcare transitions, even after adjusting for sepsis and pneumonia  
12  
13  
14 5 severity.<sup>[38]</sup> An international multidisciplinary group proposed a CGA<sup>[39]</sup> adapted to the  
15  
16 6 emergency department context to assess frailty in elderly patients.<sup>[16,40]</sup> Although many  
17  
18 7 physicians and intensivists do not currently perform CGAs in critically ill patients with  
19  
20 8 infectious diseases, demographic shifts may require addressing this issue promptly.  
21  
22 9 Moreover, frailty is a dynamic state and can be reversed.<sup>[41]</sup> Preventing frailty is  
23  
24 10 possible, especially during onset, and the early diagnosis of this condition is crucial to  
25  
26 11 improve therapeutic efficacy and the post-discharge management of elderly patients  
27  
28 12 with CAP.<sup>[11]</sup>

13 This study has limitations. First, the results were not compared with data from other  
14 hospitals and regions. Second, the number of patients and end-point events was small.  
15 Third, the study did not evaluate the association between frailty and CAP in outpatients;  
16 therefore, the results cannot be generalized to other patient groups.

17 This study adjusted for confounding factors and demonstrated that frailty strongly  
18 affected the long-term prognosis of CAP patients. These data can contribute to the  
19 long-term management of frailty in CAP patients.

## 20 Conclusions

21 Frailty is very common in elderly patients with CAP and increases the risk of 1-year



1 mortality from CAP and SCAP. Our findings suggest that frailty should be evaluated in  
2 routine clinical practice to improve the post-discharge management of older patients  
3 with CAP.

4 **Contributors** Jia Luo, Wen Tang, Ying Sun, and Chun-Yan Jiang conceived and  
5 designed the study. Jia Luo and Wen Tang collected data. Wen Tang, Ying Sun, and  
6 Chun-Yan Jiang analyzed and interpreted data. Jia Luo and Wen Tang wrote the  
7 manuscript. All authors approved the final manuscript.

8 **Funding sources:** This work was supported by the Beijing Municipal Administration  
9 of Hospitals Clinical Medicine Development of Special Funding Support (Process No.  
10 ZYLX201838) and the Beijing Friendship Hospital of Capital Medical University  
11 Hospital Startup Funding (Process No. yyqdk2017-37).

12 **Competing interests:** None declared.

13 **Ethical approval:** This study was approved by the research ethics committee of  
14 Beijing Friendship Hospital and Capital Medical University and conformed to the ethical  
15 guidelines of the Declaration of Helsinki (Project No. 2018-P2-138-01). All patients  
16 provided informed consent before the commencement of the study.

17 **Data sharing:** Data are available with the first author (e-mail:  
18 [ann11121112@sina.com](mailto:ann11121112@sina.com)).

## 19 References

20 [1] Prina E, Ranzani OT, Torres A. Community-acquired pneumonia. *Lancet*.

- 1  
2  
3  
4 1 2015;386(9998):1097-108.  
5  
6  
7 2 [2] Song JH, Huh K, Chung DR. Community-Acquired Pneumonia in the Asia-Pacific  
8  
9  
10 3 Region. *Semin Respir Crit Care Med*. 2016;37(6):839-54.  
11  
12  
13 4 [3] Chalmers J, Campling J, Ellsbury G, et al. Community-acquired pneumonia in the  
14  
15  
16 5 United Kingdom: a call to action. *Pneumonia (Nathan)*. 2017; 9:15.  
17  
18  
19 6 [4] Cilloniz C, Rodriguez-Hurtado D, Torres A. Characteristics and Management of  
20  
21  
22 7 Community-Acquired Pneumonia in the Era of Global Aging. *Med Sci (Basel)*.  
23  
24  
25 8 2018;6(2):35.  
26  
27  
28 9 [5] Jain S, Self WH, Wunderink RG, et al. Community-Acquired Pneumonia Requiring  
29  
30  
31 10 Hospitalization among U.S. Adults[J]. *N Engl J Med*,2015,373(5):415-427.  
32  
33  
34 11 [6] Cao B, Huang Y, She DY, et al. Diagnosis and treatment of community-acquired  
35  
36  
37 12 pneumonia in adults: 2016 clinical practice guidelines by the Chinese Thoracic Society,  
38  
39  
40 13 Chinese Medical Association. *Clin Respir J*. 2018;12(4):1320-60.  
41  
42  
43 14 [7] Almirall J, Serra-Prat M, Bolibar I, et al. Risk Factors for Community-Acquired  
44  
45  
46 15 Pneumonia in Adults: A Systematic Review of Observational Studies. *Respiration*.  
47  
48  
49 16 2017;94(3):299-311.  
50  
51  
52 17 [8] Yeo HJ, Byun KS, Han J, et al. Prognostic significance of malnutrition for long-term  
53  
54  
55 18 mortality in community-acquired pneumonia: a propensity score matched analysis.  
56  
57  
58 19 *Korean J Intern Med*. 2019;34(4):841-9.  
59  
60  
20 [9] Cilloniz C, Polverino E, Ewig S, et al. Impact of age and comorbidity on cause and

- 1 outcome in community-acquired pneumonia. *Chest*. 2013;144(3):999-1007.
- 2 [10] Klausen HH, Petersen J, Lindhardt T, et al. Outcomes in elderly Danish citizens  
3 admitted with community-acquired pneumonia. Regional differences, in a public  
4 healthcare system. *Respir Med*. 2012;106(12):1778-87.
- 5 [11] Hoogendijk EO, Afilalo J, Ensrud KE, et al. Frailty: implications for clinical practice  
6 and public health. *Lancet*. 2019;394(10206):1365-75.
- 7 [12] Chang SF, Lin PL. Frail phenotype and mortality prediction: a systematic review  
8 and meta-analysis of prospective cohort studies. *Int J Nurs Stud*. 2015;52(8):1362-  
9 1374.
- 10 [13] Dent E, Martin FC, Bergman H, et al. Management of frailty: opportunities,  
11 challenges, and future directions. *Lancet*. 2019;394(10206): 1376-1386.
- 12 [14] Costa D, Aladio M, Girado C A, et al. Frailty is independently associated with 1-  
13 year mortality after hospitalization for acute heart failure. *Int J Cardiol Heart Vasc*.  
14 2018;7(21):103-106.
- 15 [15] Walker SR, Gill K, Macdonald K, et al. Association of frailty and physical function  
16 in patients with non-dialysis CKD: a systematic review. *BMC Nephrol*. 2013; 14:228.
- 17 [16] Flaatten H, De Lange DW, Morandi A, et al. The impact of frailty on ICU and 30-  
18 Day mortality and the level of care in very elderly patients ( $\geq 80$  Years). *Intensive Care*  
19 *Med*. 2017;43(12): 1820–1828.
- 20 [17] Millett ER, De Stavola BL, Quint JK, et al. Risk factors for hospital admission in

1  
2  
3  
4 1 the 28 days following a community-acquired pneumonia diagnosis in older adults, and  
5  
6 2 their contribution to increasing hospitalization rates over time: a cohort study. *BMJ*  
7  
8  
9 3 *Open*. 2015;5(12): e008737.

10  
11  
12 4 [18] Pilotto A, Dini S, Daragjati J, et al. Combined use of the multidimensional  
13  
14  
15 5 prognostic index (MPI) and procalcitonin serum levels in predicting 1-month mortality  
16  
17  
18 6 risk in older patients hospitalized with community-acquired pneumonia (CAP): a  
19  
20  
21 7 prospective study. *Aging Clin Exp Res*. 2018;30(2):193-197.

22  
23  
24 8 [19] Mandell LA, Wunderink RG, Anzueto A, et al. Infectious Diseases Society of  
25  
26  
27 9 America/American Thoracic Society consensus guidelines on the management of  
28  
29  
30 10 community-acquired pneumonia in adults. *Clin Infect Dis*. 2007;44 Suppl 2:S27-72.

31  
32  
33 11 [20] Fried LP, Tangen CM, Walston J, et al. Frailty in older adults: evidence for a  
34  
35  
36 12 phenotype. *J Gerontol A Biol Sci Med Sci*. 2001;56(3):M146-56.

37  
38  
39 13 [21] Charlson ME, Pompei P, Ales KL, et al. A new method of classifying prognostic  
40  
41  
42 14 comorbidity in longitudinal studies: development and validation. *J Chronic Dis*.  
43  
44 15 1987;40(5):373-83.

45  
46  
47 16 [22] Mahoney FI, Barthel DW. Functional Evaluation: The Barthel Index. *Md State Med*  
48  
49  
50 17 *J*. 1965;14:61-5.

51  
52  
53 18 [23] Rubenstein LZ, Harker JO, Salvà A, et al. Screening for undernutrition in geriatric  
54  
55  
56 19 practice: developing the short-form mini-nutritional assessment (MNA-SF). *J Gerontol*  
57  
58  
59 20 *A Biol Sci Med Sci*. 2001 Jun;56(6):M366-72.

- 1  
2  
3  
4 1 [24] Luna CM, Palma I, Niederman MS, et al. The Impact of Age and Comorbidities on  
5  
6 2 the Mortality of Patients of Different Age Groups Admitted with Community-acquired  
7  
8  
9 3 Pneumonia. *Ann Am Thorac Soc*. 2016;13(9):1519-26.  
10  
11  
12 4 [25] Weir DL, Majumdar SR, McAlister FA, et al. The impact of multimorbidity on short-  
13  
14 5 term events in patients with community-acquired pneumonia: prospective cohort study.  
15  
16  
17 6 *Clin Microbiol Infect*. 2015;21(3):264 e7-e13.  
18  
19  
20 7 [26] Chen J, Chang S, Liu J, et al. Comparison of clinical characteristics and  
21  
22 8 performance of pneumonia severity score and CURB-65 among younger adults,  
23  
24 9 elderly and very old subjects. *Thorax*. 2010;65(11): 971-977.  
25  
26  
27  
28  
29 10 [27] Simonetti AF, Viasus D, Garcia-Vidal C, Carratala J. Management of community-  
30  
31 11 acquired pneumonia in older adults. *Ther Adv Infect Dis*. 2014;2(1):3-16.  
32  
33  
34  
35  
36 12 [28] Morley JE, Vellas B, van Kan GA, et al. Frailty consensus: a call to action. *J Am*  
37  
38 13 *Med Dir Assoc*. 2013;14(6):392-7.  
39  
40  
41  
42 14 [29] Dent E, Martin FC, Bergman H, et al. Management of frailty: opportunities,  
43  
44 15 challenges, and future directions. *Lancet*. 2019;394(10206): 1376-1386.  
45  
46  
47  
48 16 [30] Collard RM, Boter H, Schoevers RA, et al. Prevalence of frailty in community-  
49  
50 17 dwelling older persons: a systematic review. *J Am Geriatr Soc*. 2012;60(8):1487-92.  
51  
52  
53  
54 18 [31] Lorenzo-Lopez L, Maseda A, de Labra C, et al. Nutritional determinants of frailty  
55  
56 19 in older adults: A systematic review. *BMC Geriatr*. 2017;17(1):108.  
57  
58  
59  
60 20 [32] Jeejeebhoy KN. Malnutrition, fatigue, frailty, vulnerability, sarcopenia and

- 1  
2  
3  
4 1 cachexia: overlap of clinical features. *Curr Opin Clin Nutr Metab Care*. 2012;15(3):213-  
5  
6 2 9.  
7  
8  
9  
10 3 [33] Yeo HJ, Byun KS, Han J, et al. Prognostic significance of malnutrition for long-  
11  
12 4 term mortality in community-acquired pneumonia: a propensity score matched analysis.  
13  
14  
15 5 *Korean J Intern Med*. 2019;34(4): 841-849.  
16  
17  
18 6 [34] Washio M, Kondo K, Fujisawa N, et al. Hypoalbuminemia, influenza vaccination  
19  
20 7 and other factors related to the development of pneumonia acquired outside hospitals  
21  
22 8 in southern Japan: A case-control study. *Geriatr Gerontol Int*. 2016;16(2): 223-229.  
23  
24  
25  
26  
27 9 [35] Laur CV, McNicholl T, Valaitis R, et al. Malnutrition or frailty? Overlap and  
28  
29 10 evidence gaps in the diagnosis and treatment of frailty and malnutrition. *Appl Physiol*  
30  
31 11 *Nutr Metab*. 2017;42(5):449-58.  
32  
33  
34  
35  
36 12 [36] Wesemann T, Nullmann H, Pflug MA, et al. Pneumonia severity, comorbidity and  
37  
38 13 1-year mortality in predominantly older adults with community-acquired pneumonia: a  
39  
40 14 cohort study. *BMC Infect Dis*. 2015;15:2.  
41  
42  
43  
44  
45 15 [37] Schoevaerds D, Sibille FX, Gavazzi G. Infections in the older population: what do  
46  
47 16 we know? *Aging Clin Exp Res*. 2019 Oct 26.  
48  
49  
50  
51 17 [38] Choi JY, Kim SW, Yoon SJ et al. Impact of frailty on do-not-resuscitate orders and  
52  
53 18 healthcare transitions among elderly Koreans with pneumonia. *Clin Interv Aging*.  
54  
55 19 2018;1(13):2237-2245.  
56  
57  
58  
59 20 [39] Gonzalez-Castillo J, Martin-Sanchez FJ, Llinares P, Menendez R, Mujal A, Navas  
60

1  
2  
3  
4 1 E, et al. Guidelines for the management of community-acquired pneumonia in the  
5  
6 2 elderly patient. Rev Esp Quimioter. 2014;27(1):69-86.  
7  
8

9  
10 3 [40] Rubenstein LZ, Stuck AE, Siu AL, et al. Impacts of geriatric evaluation and  
11  
12 4 management programs on defined outcomes: overview of the evidence. J Am Geriatr  
13  
14 5 Soc. 1991;39(9 Pt 2):8S-16S; discussion 7S-8S.  
15  
16  
17

18 6 [41] Hoogendijk EO, Afilalo J, Ensrud KE, et al. Frailty: implications for clinical practice  
19  
20 7 and public health. Lancet. 2019;394(10206):1365-75.  
21  
22  
23  
24  
25  
26  
27  
28  
29  
30  
31  
32  
33  
34  
35  
36  
37  
38  
39  
40  
41  
42  
43  
44  
45  
46  
47  
48  
49  
50  
51  
52  
53  
54  
55  
56  
57  
58  
59  
60

1 Table 1. Baseline characteristics of the study population according to frailty status.

| Characteristics                         | Total cohort        | Non-frail           | Frail†              | P-values |
|-----------------------------------------|---------------------|---------------------|---------------------|----------|
| N (%)                                   | 256                 | 85 (33.2)           | 171 (66.8)          |          |
| Age, median (IQR)                       | 86 (81, 90)         | 83 (75, 87)         | 88 (84, 91)         | <0.001*  |
| Sex, n (%)                              |                     |                     |                     |          |
| Female                                  | 76 (29.7)           | 17 (20.0)           | 59 (34.5)           | 0.017*   |
| Male                                    | 180 (70.3)          | 68 (80.0)           | 112 (65.5)          |          |
| Smoking status, n (%)                   |                     |                     |                     |          |
| Current                                 | 29 (11.3)           | 11 (12.9)           | 18 (10.5)           | 0.288    |
| Previous                                | 71 (27.7)           | 28 (32.9)           | 43 (25.1)           |          |
| Never                                   | 156 (60.9)          | 46 (54.1)           | 110 (64.3)          |          |
| BMI (kg/m <sup>2</sup> ), mean (SD)     | 22.9 (4.3)          | 24.2 (3.8)          | 22.3 (4.4)          | 0.001*   |
| Barthel Index, median (IQR)             | 65 (40, 95)         | 95 (85, 100)        | 50 (20, 70)         | <0.001*  |
| CCI, median (IQR)                       | 4 (3, 5)            | 3 (2, 4)            | 4 (3, 6)            | <0.001*  |
| MNA-SF, median (IQR)                    | 10 (7, 12)          | 12 (11, 14)         | 9 (7, 11)           | <0.001*  |
| Malnutrition, n (%) <sup>§</sup>        | 71 (27.7)           | 6 (7.1)             | 65 (38.0)           |          |
| SCAP‡, n (%)                            | 57 (22.3)           | 8 (9.41)            | 49 (28.65)          | <0.001*  |
| PCT (ng/mL), median (IQR)               | 0.28 (0.21, 0.44)   | 0.27 (0.20, 0.37)   | 0.29 (0.21, 0.55)   | 0.149    |
| hs-CRP (mg/L), median (IQR)             | 25.89 (5.79, 61.41) | 19.63 (4.19, 54.29) | 27.08 (7.56, 62.43) | 0.129    |
| WBC (*10 <sup>9</sup> /L), median (IQR) | 7.65 (5.57, 11.06)  | 7.02 (5.64, 9.01)   | 8.02 (5.51, 12.33)  | 0.043*   |
| HGB (g/L), median (IQR)                 | 121 (108, 133)      | 127 (120, 136)      | 115 (100, 128)      | <0.001*  |



|                                         |                   |                   |                    |         |
|-----------------------------------------|-------------------|-------------------|--------------------|---------|
| Scr ( $\mu\text{mol/L}$ ), median (IQR) | 76.9 (61.6, 96.8) | 78.6 (67.4, 90.5) | 75.2 (59.5, 101.6) | 0.720   |
| BUN (mmol/L), median (IQR)              | 5.98 (4.58, 7.94) | 5.99 (4.30, 7.01) | 5.98 (4.79, 8.65)  | 0.039*  |
| ALT (U/L), median (IQR)                 | 14 (10, 22)       | 15 (11, 22)       | 13 (10, 21)        | 0.058   |
| ALB (g/L), mean (SD)                    | 32.46 (4.39)      | 34.38 (4.22)      | 31.50 (4.16)       | <0.001* |
| PA (g/L), mean (SD)                     | 16.92 (6.19)      | 18.74 (6.41)      | 15.98 (5.88)       | 0.001*  |
| 30-day mortality, n (%)                 | 14 (5.5)          | 0 (0)             | 14 (8.19)          | 0.015*  |
| 1-year mortality, n (%)                 | 43 (16.8)         | 0 (0)             | 43 (25.15)         | <0.001* |

Abbreviations: SD, standard deviation; IQR, inter-quartile range; BMI, body mass index; CCI, Charlson's Comorbidity Index; MNA-SF, Mini Nutritional Assessment-Short Form; SCAP, severe community-acquired pneumonia; PCT, procalcitonin; hs-CRP, high sensitivity C-reactive protein; WBC, white blood cell count; HGB, hemoglobin; BUN, blood urea nitrogen; Scr, serum creatinine; ALT, alanine aminotransferase; ALB, albumin; PA, prealbumin.

\*  $P < 0.05$ .

† Frailty was defined as Fried Phenotype scores  $\geq 3$ .

‡ SCAP was defined by IDSA/ATS criteria (2007).

§ Malnutrition was defined as MNA-SF scores  $\leq 7$ .

1 Table 2. Significant risk factors for 30-day and 1-year mortality in patients with  
 2 community-acquired pneumonia in COX proportional hazards regression analyses  
 3 (n=256).

| Variable                | Univariate |             |         | Multivariate |             |         |
|-------------------------|------------|-------------|---------|--------------|-------------|---------|
|                         | HR         | 95% CI      | P-Value | HR           | 95% CI      | P-Value |
| <b>30-day mortality</b> |            |             |         |              |             |         |
| SCAP                    | 52.01      | 6.80-398.09 | <0.001  | 30.60        | 3.77-248.06 | 0.001   |
| Malnutrition            | 0.84       | 0.73-0.97   | 0.015   | 1.11         | 0.90-1.35   | 0.330   |
| Frailty                 | 2.58       | 1.42-4.69   | 0.002   | 1.83         | 0.88-3.81   | 0.108   |
| CCI                     | 1.41       | 1.19-1.67   | <0.001  | 1.19         | 0.99-1.43   | 0.069   |
| <b>1-year mortality</b> |            |             |         |              |             |         |
| SCAP                    | 13.32      | 6.81-26.04  | <0.001  | 7.68         | 3.79-15.58  | <0.001  |
| BI                      | 0.98       | 0.97-0.99   | <0.001  | 1.01         | 0.99-1.02   | 0.352   |
| BMI                     | 0.93       | 0.87-1.00   | 0.038   | 1.07         | 0.98-1.16   | 0.128   |
| Malnutrition            | 0.78       | 0.72-0.85   | <0.001  | 0.94         | 0.81-1.10   | 0.424   |
| Frailty                 | 3.41       | 2.32-5.03   | <0.001  | 2.70         | 1.69-4.39   | <0.001  |
| CCI                     | 1.40       | 1.26-1.55   | <0.001  | 1.19         | 1.05-1.34   | <0.001  |

4 Data are estimated hazard ratios and 95% confidence intervals of the explanatory  
 5 variables in the 30-day and 1-year mortality group. Data were adjusted for age, sex,  
 6 disability, malnutrition, comorbidities, and the severity of CAP.

7 Abbreviations: HR, hazards ratio; CI, confidence interval; SCAP, severe community-  
 8 acquired pneumonia; BI, Barthel Index; BMI, body mass index; CCI, Charlson's  
 9 Comorbidity Index.

10

11

12

13

1 Table 3. Significant risk factors for 1-year mortality in patients with severe community-  
 2 acquired pneumonia in COX proportional hazards regression analyses (n=57).

| Variable     | Univariate |           |         | Multivariate |           |         |
|--------------|------------|-----------|---------|--------------|-----------|---------|
|              | HR         | 95% CI    | P-value | HR           | 95% CI    | P-value |
| BI           | 0.99       | 0.98–1.00 | 0.046   | 1.00         | 0.99–1.02 | 0.875   |
| Malnutrition | 0.86       | 0.77–0.97 | 0.010   | 1.05         | 0.89–1.25 | 0.545   |
| n            |            |           |         |              |           |         |
| Frailty      | 2.82       | 1.70–4.68 | <0.001  | 2.87         | 1.58–4.96 | <0.001  |
| CCI          | 1.24       | 1.10–1.40 | 0.001   | 1.16         | 1.01–1.34 | 0.034   |

3 Data are estimated hazard ratios and 95% confidence intervals of the explanatory  
 4 variables in the 1-year mortality group. Data were adjusted for age, sex, disability,  
 5 malnutrition, and comorbidities.

6 Abbreviations: HR, hazards ratio; CI, confidence interval; SCAP, severe community-  
 7 acquired pneumonia; BI, Barthel Index; CCI, Charlson's Comorbidity Index.



Figure 1. Flow chart of the study population

Supplementary Table. Characteristics of severe community-acquired pneumonia<sup>‡</sup> stratified by frailty status.

| Characteristics                      | Non-frail           | Frail <sup>†</sup>  | P-values |
|--------------------------------------|---------------------|---------------------|----------|
| N, n (%)                             | 8 (14.0)            | 49 (86.0)           |          |
| Age, median (IQR)                    | 85 (82–91)          | 89 (81–92)          | 0.581    |
| Sex, n (%)                           |                     |                     |          |
| Female                               | 0 (0)               | 11 (22.5)           | 0.053    |
| Male                                 | 8 (100)             | 38 (77.6)           |          |
| BMI (kg/m <sup>2</sup> ), mean (SD)  | 22.95 (2.56)        | 21.59 (4.81)        | 0.249    |
| Barthel Index, median (IQR)          | 88 (59–99)          | 35 (8–68)           | 0.001*   |
| CCI, median (IQR)                    | 4 (2–5)             | 5 (3–8)             | 0.129    |
| MNA-SF, mean (SD)                    | 11 (3)              | 7 (3)               | 0.003*   |
| PCT (ng/mL), median (IQR)            | 0.30 (0.21–0.40)    | 0.31 (0.23–1.74)    | 0.477    |
| hs-CRP (mg/L), median (IQR)          | 33.52 (3.65–154.94) | 34.42 (19.08–89.78) | 0.928    |
| WBC (*10 <sup>9</sup> /L), mean (SD) | 8.45 (2.53)         | 10.83 (5.27)        | 0.218    |
| HGB (g/L), median (IQR)              | 122 (106–146)       | 114 (93–123)        | 0.179    |
| Scr (μmol/L), median (IQR)           | 103.5 (88.5–121.1)  | 82.6 (62.1–114.8)   | 0.161    |
| BUN (mmol/L), median (IQR)           | 8.35 (6.86–9.49)    | 7.98 (5.67–12.07)   | 0.730    |
| ALT (U/L), median (IQR)              | 16 (10–27)          | 13 (10–20)          | 0.557    |
| ALB (g/L), median (IQR)              | 33.10 (31.75–34.38) | 30.00 (27.35–32.85) | 0.039*   |
| PA (g/L), mean (SD)                  | 18.56 (9.60)        | 14.44 (5.85)        | 0.118    |
| 30-day mortality, n (%)              | 0 (0)               | 13 (26.53)          | 0.034*   |
| 1-year mortality, n (%)              | 0 (0)               | 31 (63.27)          | <0.001*  |

Abbreviations: SD, standard deviation; IQR, inter-quartile range; BMI, body mass index; CCI, Charlson's Comorbidity Index; MNA-SF, Mini Nutritional Assessment-Short Form; PCT, procalcitonin; hs-CRP, high-sensitivity C-reactive

1  
2  
3 protein; WBC, white blood cell count; HGB, hemoglobin; BUN, blood urea nitrogen;  
4 Scr, serum creatinine; ALT, alanine aminotransferase; ALB, albumin; PA, prealbumin.  
5

6 \* P < 0.05.  
7

8 † Frailty was defined as Fried Phenotype scores  $\geq 3$ .  
9

10 ‡ Defined by IDSA/ATS criteria (2007).  
11  
12  
13  
14  
15  
16  
17  
18  
19  
20  
21  
22  
23  
24  
25  
26  
27  
28  
29  
30  
31  
32  
33  
34  
35  
36  
37  
38  
39  
40  
41  
42  
43  
44  
45  
46  
47  
48  
49  
50  
51  
52  
53  
54  
55  
56  
57  
58  
59  
60

For peer review only

# BMJ Open

## Impact of frailty on 30-day and 1-year mortality in hospitalized elderly patients with community-acquired pneumonia: a prospective observational study

|                                 |                                                                                                                                                                                                                                                                                                                                                                                                                                       |
|---------------------------------|---------------------------------------------------------------------------------------------------------------------------------------------------------------------------------------------------------------------------------------------------------------------------------------------------------------------------------------------------------------------------------------------------------------------------------------|
| Journal:                        | <i>BMJ Open</i>                                                                                                                                                                                                                                                                                                                                                                                                                       |
| Manuscript ID                   | bmjopen-2020-038370.R3                                                                                                                                                                                                                                                                                                                                                                                                                |
| Article Type:                   | Original research                                                                                                                                                                                                                                                                                                                                                                                                                     |
| Date Submitted by the Author:   | 24-Aug-2020                                                                                                                                                                                                                                                                                                                                                                                                                           |
| Complete List of Authors:       | luo, jia; Capital Medical University Affiliated Beijing Friendship Hospital, Geriatric department;<br>Tang, Wen; Capital Medical University Affiliated Beijing Friendship Hospital, Department of Geriatrics<br>Ying, Sun; Capital Medical University Affiliated Beijing Friendship Hospital, Department of Geriatrics<br>Jiang, Chunyan; Capital Medical University Affiliated Beijing Friendship Hospital, Department of Geriatrics |
| <b>Primary Subject Heading</b>: | Geriatric medicine                                                                                                                                                                                                                                                                                                                                                                                                                    |
| Secondary Subject Heading:      | Respiratory medicine, Medical management, Infectious diseases                                                                                                                                                                                                                                                                                                                                                                         |
| Keywords:                       | GERIATRIC MEDICINE, INTERNAL MEDICINE, Respiratory infections < THORACIC MEDICINE, RESPIRATORY MEDICINE (see Thoracic Medicine)                                                                                                                                                                                                                                                                                                       |
|                                 |                                                                                                                                                                                                                                                                                                                                                                                                                                       |

SCHOLARONE™  
Manuscripts



I, the Submitting Author has the right to grant and does grant on behalf of all authors of the Work (as defined in the below author licence), an exclusive licence and/or a non-exclusive licence for contributions from authors who are: i) UK Crown employees; ii) where BMJ has agreed a CC-BY licence shall apply, and/or iii) in accordance with the terms applicable for US Federal Government officers or employees acting as part of their official duties; on a worldwide, perpetual, irrevocable, royalty-free basis to BMJ Publishing Group Ltd ("BMJ") its licensees and where the relevant Journal is co-owned by BMJ to the co-owners of the Journal, to publish the Work in this journal and any other BMJ products and to exploit all rights, as set out in our [licence](#).

The Submitting Author accepts and understands that any supply made under these terms is made by BMJ to the Submitting Author unless you are acting as an employee on behalf of your employer or a postgraduate student of an affiliated institution which is paying any applicable article publishing charge ("APC") for Open Access articles. Where the Submitting Author wishes to make the Work available on an Open Access basis (and intends to pay the relevant APC), the terms of reuse of such Open Access shall be governed by a Creative Commons licence – details of these licences and which [Creative Commons](#) licence will apply to this Work are set out in our licence referred to above.

Other than as permitted in any relevant BMJ Author's Self Archiving Policies, I confirm this Work has not been accepted for publication elsewhere, is not being considered for publication elsewhere and does not duplicate material already published. I confirm all authors consent to publication of this Work and authorise the granting of this licence.



1 Impact of frailty on 30-day and 1-year mortality in hospitalized elderly patients with  
2 community-acquired pneumonia: a prospective observational study

3 Jia Luo, MD; Wen Tang\*, MD, PhD; Ying Sun, MD, PhD; Chun-Yan Jiang, MD, PhD.

4 Department of Geriatrics, Beijing Friendship Hospital, Capital Medical University,  
5 Beijing, 100050, People's Republic of China

6 **Corresponding Author:** Wen Tang, MD, PhD. Department of Geriatrics, Beijing  
7 Friendship Hospital, Capital Medical University. Postal address: No. 95, Yong'an Road,  
8 Xicheng District, Beijing 100050, PR China. Email: twybxz@163.com. Tel: + (86  
9 10) 63137642 / +86 15810683607. Fax: + (86 10) 63138795.

10 **The first author:** Jia Luo, MD; Department of Geriatrics, Beijing Friendship Hospital,  
11 Capital Medical University. E-mail: ann11121112@sina.com.

12 **The co-authors:** Ying Sun, MD, PhD; Department of Geriatrics, Beijing Friendship  
13 Hospital, Capital Medical University. E-mail: ysun15@163.com.

14 Chun-Yan Jiang, MD, PhD; Department of Geriatrics, Beijing Friendship Hospital,  
15 Capital Medical University. E-mail: jchy12368@sina.com.

16 **Short title:** Impact of frailty on community-acquired pneumonia

17 **Word count:** Abstract—291; Manuscript--2382

18 **Keywords:** Community-acquired pneumonia; Frailty; Elderly; Prognosis.

19

1  
2  
3 **1 Abstract**  
4

5  
6 **2 Objectives:** This study evaluates the impact of frailty, which is a state of increased  
7  
8  
9  
10  
11  
12  
13  
14  
15  
16  
17  
18  
19  
20  
21  
22  
23  
24  
25  
26  
27  
28  
29  
30  
31  
32  
33  
34  
35  
36  
37  
38  
39  
40  
41  
42  
43  
44  
45  
46  
47  
48  
49  
50  
51  
52  
53  
54  
55  
56  
57  
58  
59  
60  
**3** vulnerability to stressors, on 30-day and 1-year mortality among elderly patients with  
**4** community-acquired pneumonia (CAP). The main hypothesis is that frailty is an  
**5** independent predictor of prognosis in elderly CAP patients.

**6 Design:** Prospective, observational, follow-up cohort study.

**7 Setting:** A 2000-bed tertiary care hospital in Beijing, China.

**8 Participants:** Consecutive CAP patients aged  $\geq 65$  years admitted to the geriatric  
9 department of our hospital between September 2017 and February 2019.

**10 Main outcome measures:** The primary outcomes were all-cause mortality at 30 days  
11 and 1 year after hospital admission. The impact of frailty (defined by Frailty Phenotype)  
12 on 30-day and 1-year mortality of elderly patients with CAP was assessed by Cox  
13 regression analysis.

**14 Results:** The cohort included 256 patients. The median (IQR) age was 86 (81, 90)  
15 years, and 180 (70.3%) participants were men. A total of 171/256 (66.8%) patients  
16 were frail. The prevalence of frailty was significantly associated with older age, female  
17 gender, lower BMI, comorbidities, limitations in activities of daily living, and poor  
18 nutritional status. Frail participants were significantly more likely to have severe CAP  
19 than non-frail counterparts (28.65% vs. 9.41%,  $P < 0.001$ ). The 1-year mortality risk was  
20 approximately three-fold higher in frail patients (adjusted HR, 2.70; 95% CI, 1.69-4.39)  
21 than non-frail patients. Subgroup analysis of patients with severe CAP showed that the

1 1-year mortality risk was approximately three-fold higher in the frail group (adjusted  
2 HR, 2.87; 95% CI, 1.58-4.96) than in the non-frail group. The association between  
3 frailty and 30-day mortality was not significant.

4 **Conclusions:** These findings suggest that frailty is strongly associated with severe  
5 CAP and higher 1-year mortality in elderly patients with CAP, and frailty should be  
6 detected early to improve the management of these patients.

7 **Keywords:** Community-acquired pneumonia; Frailty; Elderly; Prognosis.

#### 8 **Strengths and limitations of this study**

- 9 1. This study evaluated frailty in elderly patients with community-acquired pneumonia  
10 (CAP).
- 11 2. The study analyzed the correlation between prognostic factors (age, disability,  
12 malnutrition, comorbidities, and CAP severity) and frailty by multivariate regression  
13 analysis and showed that frailty affected the prognosis of CAP.
- 14 3. Frailty was defined by Fried's Frailty Phenotype, which is well validated and simple  
15 to use.
- 16 4. The study was conducted in a single center and evaluated a small number of end-  
17 points.
- 18 5. The study included a small sample of older patients and did not evaluate the  
19 association between frailty and CAP in outpatients.

## 1 Introduction

2 Community-acquired pneumonia (CAP) is the most prevalent infectious disease in  
3 the elderly and is associated with high rates of mortality, morbidity, and high costs  
4 worldwide.<sup>[1, 2, 3, 4]</sup> In the United States, the incidence of CAP in the age group 65–79  
5 years is 63 cases per 10,000 adults and increases to 164.3 cases per 10,000 adults in  
6 the age group >80 years.<sup>[5]</sup> Mortality from CAP increases with age. In 2012, the  
7 average mortality from pneumonia was 17.46 cases per 100,000 in all age groups in  
8 China, 23.55 cases per 100,000 in the age group 65–69 years, and nearly 36 times  
9 higher in the age group >85 years.<sup>[6]</sup>

10 Studies have shown that age, functional status, comorbidities, and malnutrition are  
11 strongly associated with poor prognosis in CAP patients,<sup>[4,6,7,8,9,10]</sup> and higher mortality  
12 in elderly patients with CAP underscores the need to identify novel, modifiable risk  
13 factors for poor outcomes. Particular attention has recently been directed to frail elderly  
14 patients. Frailty is associated with disabilities, comorbidities, and old age and is defined  
15 as a cumulative decline in multiple organ systems and loss of physiological reserves,  
16 increasing the vulnerability to adverse outcomes, including falls, hospitalization, and  
17 mortality.<sup>[11,12,13]</sup> Moreover, frailty is an independent risk factor for mortality in patients  
18 with acute and chronic diseases.<sup>[14,15]</sup> A European multicenter study assessed the  
19 impact of frailty (measured by the Clinical Frailty Scale) on intensive care unit (ICU)  
20 admission and 30-day mortality in 5021 elderly patients and observed that frailty was  
21 found in 43% of these patients and was independently related to 30-day survival  
22 (hazard ratio [HR], 1.54; 95% confidence interval [CI], 1.38-1.73, frail versus non-frail

1 patients).<sup>[16]</sup> A study evaluated the relationship between frailty and CAP in older  
2 patients and found that frailty was associated with increased hospitalization at 28 days  
3 after CAP diagnosis<sup>[17]</sup> and significantly predicted the risk of 1-month mortality.<sup>[18]</sup>  
4 Therefore, we hypothesized that frailty is positively correlated with CAP severity and  
5 mortality in elderly patients.

6 The objective of this study was to assess the prevalence of frailty in older patients  
7 with CAP, the association between frailty and CAP severity, and 30-day and 1-year  
8 mortality. This information may be useful for the early stratification of high-risk patients  
9 and the hierarchical management of modifiable factors to improve the prognosis of  
10 elderly patients with CAP.

## 11 Methods

### 12 1. Study design

13 We prospectively and consecutively enrolled elderly patients (aged  $\geq 65$  years)  
14 diagnosed with CAP in the geriatric department of our institution from September 2017  
15 to February 2019. The exclusion criteria were complications, such as acute myocardial  
16 infarction, acute cerebrovascular disease, gastrointestinal bleeding, or acute renal  
17 failure; surgical history within 3 months; and terminal stage of a malignant tumor  
18 (Figure 1).

19 CAP was defined as pneumonia acquired outside the hospital by an  
20 immunocompetent individual. The criteria for diagnosing CAP were community-onset  
21 and the presence of new infiltrates on chest X-ray or computed tomography scan

1  
2  
3  
4 1 together with at least one of the following conditions: (i) new or increased cough  
5  
6 2 (productive, nonproductive, or accompanied by a change in sputum characteristics)  
7  
8  
9 3 with or without dyspnea, chest pain, or hemoptysis; (ii) fever; (iii) rales and/or signs of  
10  
11 4 consolidation; (iv) peripheral WBC count  $>10,000$  cells  $\text{mm}^{-3}$  or  $<4000$  cells  $\text{mm}^{-3}$  with  
12  
13  
14 5 or without an increase in immature forms. Differential diagnosis included tuberculosis,  
15  
16 6 lung cancer, noninfectious pulmonary interstitial disease, pulmonary edema,  
17  
18 7 atelectasis, pulmonary embolism, pulmonary eosinophilic infiltration, and pulmonary  
19  
20 8 vasculitis. The patients with these diagnoses were excluded.<sup>[6]</sup>

## 9 2. Baseline characteristics

10 The following parameters were evaluated within 24 hours of admission: age, sex,  
11  
12 body mass index (BMI), smoking history, procalcitonin (PCT), high-sensitivity C-  
13  
14 reactive protein (hs-CRP), white blood count (WBC), hemoglobin (HGB), alanine  
15  
16 aminotransferase (ALT), albumin (ALB), prealbumin (PA), serum creatinine (Scr), and  
17  
18 blood urea nitrogen (BUN). A comprehensive geriatric assessment (CGA), including  
19  
20 frailty, comorbidities, and functional and nutritional status, was conducted by trained  
21  
22 evaluators within 24 hours of admission.

## 17 3. Severity of CAP

18 Severe CAP (SCAP) was diagnosed according to criteria established by the  
19  
20 Infectious Diseases Society of America and the American Thoracic Society,<sup>[19]</sup> and at  
21  
22 least one major criterion or three minor criteria should be satisfied. The major criteria  
23  
24 were the need for mechanical ventilation or the diagnosis of septic shock. The minor

1  
2  
3  
4 1 criteria were respiratory rate >130 breaths/min, arterial oxygen pressure/fraction of  
5  
6 2 inspired oxygen ratio <250 mmHg, multilobar infiltrates, confusion, BUN level >120  
7  
8  
9 3 mg/dL, leukopenia resulting from infection, thrombocytopenia, hypothermia, or  
10  
11 4 hypotension requiring aggressive fluid resuscitation.  
12  
13  
14

#### 15 4. Assessment of frailty 16 17

18  
19 6 Frailty was assessed using the following Frailty Phenotype (FP) criteria:  
20  
21 7 unintentional weight loss (4.5kg in the past 12 months), self-reported exhaustion,  
22  
23 8 weakness (reduced grip strength), slow walking speed, and low physical activity.<sup>[20]</sup>  
24  
25  
26 9 The cut-off values were consistent with the original criteria. Each construct was  
27  
28  
29 10 considered present (score of 1) or absent (score of 0). The total score ranged from 0  
30  
31  
32 11 to 5. As established previously, the presence and absence of frailty were defined as a  
33  
34 12 score of  $\geq 3$  and  $\leq 2$ , respectively.  
35  
36  
37

#### 38 5. Covariates 39 40

41 14 Comorbidity was evaluated with the Charlson Comorbidity Index (CCI).<sup>[21]</sup> The CCI  
42  
43 15 is the sum of the weighted scores of the following chronic medical conditions: ischemic  
44  
45 16 heart disease, congestive heart failure, cerebrovascular accident, peripheral vascular  
46  
47 17 diseases, chronic lung diseases, diabetes, dementia, connective tissue diseases, renal  
48  
49 18 diseases, liver diseases, hemiplegia, solid or hematological malignancy, and acquired  
50  
51  
52 19 immunodeficiency disease. A score of 1, 2, 3, or 6 is assigned to each disease,  
53  
54 20 depending on severity.  
55  
56  
57  
58  
59

60 21 Functional status was assessed by evaluating patients' ability to perform activities

1 of daily living (ADLs) using the Barthel Index (BI).<sup>[22]</sup>

2 Nutritional status was assessed using the Mini Nutritional Assessment-Short Form  
3 questionnaire.<sup>[23]</sup> This questionnaire evaluates BMI, weight loss in the past 3 months,  
4 dietary changes, stress or acute illness, degree of mobility, and neuropsychiatric  
5 diseases. The total score is 14 points, and scores of 0-7 indicate malnutrition.

## 6 5. Follow-up and outcomes

7 All patients were followed for 1 year after hospital admission. Deaths were  
8 confirmed through surveillance or official death records. The primary outcomes were  
9 all-cause mortality at 30 days and 1 year after admission.

## 10 6. Statistical analysis

11 Statistical analyses were performed using IBM SPSS software version 23.0  
12 (Chicago, USA). Continuous variables were expressed as the means  $\pm$  standard  
13 deviation (SD) or interquartile range (IQR) and compared using Student's t-test or the  
14 Mann–Whitney U test. Categorical variables were compared using the chi-squared test  
15 or Fisher's exact test. The association between baseline frailty status and 30-day and  
16 1-year all-cause mortality was analyzed using univariate and multivariate Cox  
17 proportional hazards regression models, and the results were expressed as hazard  
18 ratio (HR) and 95% confidence interval (CI). A two-tailed p-value of less than 0.05 was  
19 considered to indicate a statistically significant difference.

## 20 Patient and public involvement



1 Patients and the public were not involved in the study design, recruitment, or  
2 execution, and the participants were not be involved in disseminating the results. The  
3 study results will be provided to patients upon request, and aggregated data will be  
4 reported in project reports and research publications and meetings.

## 5 Results

6 In our cohort, 393 older patients with CAP were admitted to our department during  
7 the study period. Of these, 119 patients were excluded because of concomitant  
8 diseases, and 18 were lost to follow-up (Figure 1). A total of 256 patients with CAP  
9 aged 65-99 years were included in the final analysis. Demographic characteristics are  
10 presented in Table 1. The median age of the cohort was 86 (IQR, 81–90) years, and  
11 180 (70.3%) patients were men. A total of 171 (66.8%) participants were frail, 71  
12 (27.7%) patients were malnourished, and 57 (22.3%) participants had SCAP. All-cause  
13 mortality at 30 days and 1 year was 5.5% and 16.8%, respectively.

14 Frailty was significantly associated with older age, female gender, lower BMI,  
15 limitations in ADLs, comorbidities, and poor nutritional status. Frail participants were  
16 significantly more likely to have SCAP than non-frail counterparts (28.65% vs. 9.41%,  
17  $P<0.001$ ). Thirty-day and 1-year mortality was significantly higher in frail patients (0 vs.  
18 8.19%,  $P=0.015$ ; and 0 vs. 25.25%,  $P<0.001$ , respectively). The results of Cox  
19 proportional hazards regression are presented in Table 2. SCAP, frailty, malnutrition,  
20 and CCI were significantly associated with 30-day mortality in the univariate analysis,  
21 but only SCAP remained significant in the multivariate analysis (adjusted HR, 30.60;

1 95% CI, 3.77-248.06). The factors associated with 1-year mortality in the multivariable  
2 analysis were SCAP (adjusted HR, 7.68; 95% CI, 3.79-15.58), frailty (adjusted HR,  
3 2.70; 95% CI, 1.69-4.39), and CCI (adjusted HR, 1.19; 95% CI, 1.05-1.34).

4 Subgroup analysis of patients with SCAP by frailty status showed that eight (14%)  
5 patients were non-frail and 49 patients (86%) were frail. The frail group presented  
6 significantly worse functional and nutritional status and higher 30-day and 1-year  
7 mortality (Supplementary Table). In the multivariate analysis of patients with SCAP, 1-  
8 year mortality risk was approximately three-fold higher in the frail group (adjusted HR,  
9 2.87; 95% CI, 1.58-4.96) than in the non-frail group, and 1-year mortality risk was 16%  
10 higher among those with more comorbidities (adjusted HR, 1.16; 95% CI, 1.01-1.34)  
11 (Table 3). Only CCI was significantly correlated with 30-day mortality (HR, 1.21; 95%  
12 CI, 1.02-1.43).

### 13 Discussion

14 The results showed that frail older patients with CAP were significantly more likely  
15 to have SCAP and had a significantly higher 30-day and 1-year mortality risk than non-  
16 frail patients. In addition, frailty was an independent risk factor for 1-year mortality after  
17 adjusting for age, sex, disability, malnutrition, comorbidities, and CAP severity but was  
18 not an independent risk factor for 30-day mortality.

19 The incidence of CAP increases with age, and CAP increases the risk of morbidity  
20 and mortality. Mortality is significantly higher in elderly patients with CAP than in the  
21 general population.<sup>[4,9]</sup> All-cause mortality at 30 days and 1 year among elderly patients

1 with CAP in our cohort was 5.5% and 16.8%, respectively. Known independent  
2 prognostic factors for CAP mortality are age, comorbidities, functional status, microbial  
3 etiology, and early antibiotic treatment.<sup>[9,10,24,25]</sup> However, some studies reported that  
4 age *per se* was not an independent predictor of CAP mortality in the elderly population  
5 with pneumonia.<sup>[26,27]</sup> Frailty is an age-related disease associated with disabilities,  
6 comorbidities, and advanced age, and is characterized by a decline in physiological  
7 functions across multiple organ systems and increased vulnerability to stressors,<sup>[20,28,29]</sup>  
8 which increases the risk of adverse health outcomes, including falls, disability,  
9 hospitalization, institutionalization, and death. Various conditions, including  
10 malnutrition, sarcopenia, gait impairment, chronic inflammation, polypharmacy,  
11 cardiovascular changes, and morbidity, may cause frailty.<sup>[30,31,32]</sup> Accordingly, in our  
12 sample, all patients who died within 30 days or 1 year were frail.

13 Frailty was more prevalent in women in our study, which is consistent with a previous  
14 study.<sup>[30]</sup> In addition, frail patients had significantly older age, more comorbidities, poor  
15 nutritional and functional status, and limited ability to perform ADLs. Poor nutritional  
16 status, including hypoalbuminemia, hypoproteinemia, malnourishment, and a low  
17 nutritional score, is a strong predictor of mortality in CAP patients.<sup>[33,34]</sup> However, in our  
18 cohort, there was no significant association between nutritional status and 30-day or  
19 1-year mortality in the multivariate analysis (adjusted HR, 1.11; 95% CI, 0.90-1.35;  
20 adjusted HR, 0.94; 95% CI, 0.81-1.10, respectively). Some studies have shown that  
21 the definition, diagnosis, and treatment of frailty and malnutrition overlap.<sup>[30,32,35]</sup>  
22 Malnutrition is a physiological condition that predisposes to the occurrence and

1 development of frailty.<sup>[31]</sup> In our study, frailty was defined as a syndrome that affects  
2 multiple organ systems and was a strong predictor of long-term mortality, and this  
3 multidimensional nature may explain why frailty, but not malnutrition and disability, was  
4 significantly associated with higher mortality in the multivariate analysis.

5 Our results indicated that frailty was common in elderly patients with CAP  
6 (prevalence of 66.8%) and was closely linked to pneumonia severity; furthermore,  
7 frailty increased 1-year mortality risk nearly three-fold compared with the absence of  
8 frailty (adjusted HR, 2.70; 95% CI, 1.69-4.39). A study evaluated patient outcomes at  
9 1 year after the diagnosis of CAP and showed that age  $\geq 65$  years, nursing home  
10 residency, and comorbidity were positively associated with 1-year mortality.<sup>[36]</sup> Another  
11 study found that the risk of CAP mortality was more strongly correlated with underlying  
12 diseases than with CAP severity.<sup>[25]</sup> However, these studies did not assess the effect  
13 of frailty on CAP prognosis. The results of our study demonstrated that frailty was  
14 independently associated with 1-year mortality after adjusting for risk factors,  
15 suggesting that frailty could accurately predict adverse outcomes.

16 Our findings suggest that frail patients are more likely to have SCAP, and frailty is  
17 positively correlated to the risk of 1-year mortality. Since the clinical presentation of  
18 pneumonia may be atypical in the elderly, clinicians should suspect pneumonia in the  
19 presence of symptoms such as falls, altered mental status, fatigue, delirium, and  
20 anorexia to avoid complications associated with delayed diagnosis and therapy.<sup>[37]</sup>  
21 With respect to clinical decision-making and planning of health services, it is important  
22 to identify frailty in elderly CAP patients to better stratify the risk of adverse outcomes

1 and implement treatments tailored to individual needs, weighing up the risks and  
2 benefits of invasive diagnostic procedures and therapies, as well as taking into account  
3 end of life care needs for individuals with advanced frailty. A Korean study found that  
4 frailty was independently associated with do-not-resuscitate orders and healthcare  
5 transitions, even after adjusting for sepsis and pneumonia severity.<sup>[38]</sup> An international  
6 multidisciplinary group proposed a CGA<sup>[39]</sup> adapted to the emergency department  
7 context to assess frailty in elderly patients.<sup>[16,40]</sup> Although many physicians and  
8 intensivists do not currently perform CGAs in critically ill patients with infectious  
9 diseases, demographic shifts may require addressing this issue promptly. Moreover,  
10 frailty is a dynamic state and can be reversed.<sup>[41]</sup> Preventing frailty is possible,  
11 especially during onset, and the early diagnosis of this condition is crucial to improve  
12 therapeutic efficacy and the post-discharge management of elderly patients with  
13 CAP.<sup>[11]</sup>

14 This study has limitations. First, the results were not compared with data from other  
15 hospitals and regions. Second, the number of patients and end-point events was small.  
16 Third, the study did not evaluate the association between frailty and CAP in outpatients;  
17 therefore, the results cannot be generalized to other patient groups.

18 This study adjusted for confounding factors and demonstrated that frailty strongly  
19 affected the long-term prognosis of CAP patients. These data can contribute to the  
20 long-term management of frailty in CAP patients.

21 Conclusions

1 Frailty is very common in elderly patients with CAP and increases the risk of 1-year  
2 mortality from CAP and SCAP. Our findings suggest that frailty should be evaluated in  
3 routine clinical practice to improve the post-discharge management of older patients  
4 with CAP.

5 **Contributors** Jia Luo, Wen Tang, Ying Sun, and Chun-Yan Jiang conceived and  
6 designed the study. Jia Luo and Wen Tang collected data. Wen Tang, Ying Sun, and  
7 Chun-Yan Jiang analyzed and interpreted data. Jia Luo and Wen Tang wrote the  
8 manuscript. All authors approved the final manuscript.

9 **Funding sources:** This work was supported by the Beijing Municipal Administration  
10 of Hospitals Clinical Medicine Development of Special Funding Support (Process No.  
11 ZYLX201838) and the Beijing Friendship Hospital of Capital Medical University  
12 Hospital Startup Funding (Process No. yyqdk2017-37).

13 **Competing interests:** None declared.

14 **Ethical approval:** This study was approved by the research ethics committee of  
15 Beijing Friendship Hospital and Capital Medical University and conformed to the ethical  
16 guidelines of the Declaration of Helsinki (Project No. 2018-P2-138-01). All patients  
17 provided informed consent before the commencement of the study.

18 **Data sharing:** Data are available with the first author (e-mail:  
19 [ann11121112@sina.com](mailto:ann11121112@sina.com)).

20 References

- 1  
2  
3  
4 [1] Prina E, Ranzani OT, Torres A. Community-acquired pneumonia. *Lancet*.  
5  
6 2015;386(9998):1097-108.  
7  
8  
9  
10 [2] Song JH, Huh K, Chung DR. Community-Acquired Pneumonia in the Asia-Pacific  
11  
12 Region. *Semin Respir Crit Care Med*. 2016;37(6):839-54.  
13  
14  
15  
16 [3] Chalmers J, Campling J, Ellsbury G, et al. Community-acquired pneumonia in the  
17  
18 United Kingdom: a call to action. *Pneumonia (Nathan)*. 2017; 9:15.  
19  
20  
21  
22 [4] Cilloniz C, Rodriguez-Hurtado D, Torres A. Characteristics and Management of  
23  
24 Community-Acquired Pneumonia in the Era of Global Aging. *Med Sci (Basel)*.  
25  
26 2018;6(2):35.  
27  
28  
29  
30 [5] Jain S, Self WH, Wunderink RG, et al. Community-Acquired Pneumonia Requiring  
31  
32 Hospitalization among U.S. Adults[J]. *N Engl J Med*,2015,373(5):415-427.  
33  
34  
35  
36 [6] Cao B, Huang Y, She DY, et al. Diagnosis and treatment of community-acquired  
37  
38 pneumonia in adults: 2016 clinical practice guidelines by the Chinese Thoracic Society,  
39  
40 Chinese Medical Association. *Clin Respir J*. 2018;12(4):1320-60.  
41  
42  
43  
44  
45 [7] Almirall J, Serra-Prat M, Bolibar I, et al. Risk Factors for Community-Acquired  
46  
47 Pneumonia in Adults: A Systematic Review of Observational Studies. *Respiration*.  
48  
49 2017;94(3):299-311.  
50  
51  
52  
53 [8] Yeo HJ, Byun KS, Han J, et al. Prognostic significance of malnutrition for long-term  
54  
55 mortality in community-acquired pneumonia: a propensity score matched analysis.  
56  
57 Korean J Intern Med. 2019;34(4):841-9.  
58  
59  
60

- 1  
2  
3  
4 1 [9] Cilloniz C, Polverino E, Ewig S, et al. Impact of age and comorbidity on cause and  
5  
6  
7 2 outcome in community-acquired pneumonia. *Chest*. 2013;144(3):999-1007.  
8  
9  
10 3 [10] Klausen HH, Petersen J, Lindhardt T, et al. Outcomes in elderly Danish citizens  
11  
12 4 admitted with community-acquired pneumonia. Regional differences, in a public  
13  
14 5 healthcare system. *Respir Med*. 2012;106(12):1778-87.  
15  
16  
17  
18 6 [11] Hoogendijk EO, Afilalo J, Ensrud KE, et al. Frailty: implications for clinical practice  
19  
20 7 and public health. *Lancet*. 2019;394(10206):1365-75.  
21  
22  
23  
24 8 [12] Chang SF, Lin PL. Frail phenotype and mortality prediction: a systematic review  
25  
26 9 and meta-analysis of prospective cohort studies. *Int J Nurs Stud*. 2015;52(8):1362-  
27  
28 10 1374.  
29  
30  
31  
32  
33 11 [13] Dent E, Martin FC, Bergman H, et al. Management of frailty: opportunities,  
34  
35 12 challenges, and future directions. *Lancet*. 2019;394(10206): 1376-1386.  
36  
37  
38  
39 13 [14] Costa D, Aladio M, Girado C A, et al. Frailty is independently associated with 1-  
40  
41 14 year mortality after hospitalization for acute heart failure. *Int J Cardiol Heart Vasc*.  
42  
43 15 2018;7(21):103-106.  
44  
45  
46  
47  
48 16 [15] Walker SR, Gill K, Macdonald K, et al. Association of frailty and physical function  
49  
50 17 in patients with non-dialysis CKD: a systematic review. *BMC Nephrol*. 2013; 14:228.  
51  
52  
53  
54 18 [16] Flaatten H, De Lange DW, Morandi A, et al. The impact of frailty on ICU and 30-  
55  
56 19 Day mortality and the level of care in very elderly patients ( $\geq 80$  Years). *Intensive Care*  
57  
58 20 *Med*. 2017;43(12): 1820–1828.  
59  
60



- 1  
2  
3  
4 1 [17] Millett ER, De Stavola BL, Quint JK, et al. Risk factors for hospital admission in  
5  
6 2 the 28 days following a community-acquired pneumonia diagnosis in older adults, and  
7  
8  
9 3 their contribution to increasing hospitalization rates over time: a cohort study. *BMJ*  
10  
11 4 *Open*. 2015;5(12): e008737.
- 15 5 [18] Pilotto A, Dini S, Daragjati J, et al. Combined use of the multidimensional  
16  
17 6 prognostic index (MPI) and procalcitonin serum levels in predicting 1-month mortality  
18  
19 7 risk in older patients hospitalized with community-acquired pneumonia (CAP): a  
20  
21 8 prospective study. *Aging Clin Exp Res*. 2018;30(2):193-197.
- 26 9 [19] Mandell LA, Wunderink RG, Anzueto A, et al. Infectious Diseases Society of  
27  
28 10 America/American Thoracic Society consensus guidelines on the management of  
29  
30 11 community-acquired pneumonia in adults. *Clin Infect Dis*. 2007;44 Suppl 2:S27-72.
- 35 12 [20] Fried LP, Tangen CM, Walston J, et al. Frailty in older adults: evidence for a  
36  
37 13 phenotype. *J Gerontol A Biol Sci Med Sci*. 2001;56(3):M146-56.
- 41 14 [21] Charlson ME, Pompei P, Ales KL, et al. A new method of classifying prognostic  
42  
43 15 comorbidity in longitudinal studies: development and validation. *J Chronic Dis*.  
44  
45 16 1987;40(5):373-83.
- 49 17 [22] Mahoney FI, Barthel DW. Functional Evaluation: The Barthel Index. *Md State Med*  
50  
51 18 *J*. 1965;14:61-5.
- 55 19 [23] Rubenstein LZ, Harker JO, Salvà A, et al. Screening for undernutrition in geriatric  
56  
57 20 practice: developing the short-form mini-nutritional assessment (MNA-SF). *J Gerontol*

- 1  
2  
3  
4 1 A Biol Sci Med Sci. 2001 Jun;56(6):M366-72.  
5  
6  
7 2 [24] Luna CM, Palma I, Niederman MS, et al. The Impact of Age and Comorbidities on  
8  
9  
10 3 the Mortality of Patients of Different Age Groups Admitted with Community-acquired  
11  
12  
13 4 Pneumonia. *Ann Am Thorac Soc*. 2016;13(9):1519-26.  
14  
15  
16 5 [25] Weir DL, Majumdar SR, McAlister FA, et al. The impact of multimorbidity on short-  
17  
18  
19 6 term events in patients with community-acquired pneumonia: prospective cohort study.  
20  
21  
22 7 *Clin Microbiol Infect*. 2015;21(3):264 e7-e13.  
23  
24  
25 8 [26] Chen J, Chang S, Liu J, et al. Comparison of clinical characteristics and  
26  
27  
28 9 performance of pneumonia severity score and CURB-65 among younger adults,  
29  
30  
31 10 elderly and very old subjects. *Thorax*. 2010;65(11): 971-977.  
32  
33  
34 11 [27] Simonetti AF, Viasus D, Garcia-Vidal C, Carratala J. Management of community-  
35  
36  
37 12 acquired pneumonia in older adults. *Ther Adv Infect Dis*. 2014;2(1):3-16.  
38  
39  
40 13 [28] Morley JE, Vellas B, van Kan GA, et al. Frailty consensus: a call to action. *J Am*  
41  
42  
43 14 *Med Dir Assoc*. 2013;14(6):392-7.  
44  
45  
46 15 [29] Dent E, Martin FC, Bergman H, et al. Management of frailty: opportunities,  
47  
48  
49 16 challenges, and future directions. *Lancet*. 2019;394(10206): 1376-1386.  
50  
51  
52 17 [30] Collard RM, Boter H, Schoevers RA, et al. Prevalence of frailty in community-  
53  
54  
55 18 dwelling older persons: a systematic review. *J Am Geriatr Soc*. 2012;60(8):1487-92.  
56  
57  
58 19 [31] Lorenzo-Lopez L, Maseda A, de Labra C, et al. Nutritional determinants of frailty  
59  
60 20 in older adults: A systematic review. *BMC Geriatr*. 2017;17(1):108.

- 1  
2  
3  
4 1 [32] Jeejeebhoy KN. Malnutrition, fatigue, frailty, vulnerability, sarcopenia and  
5  
6 2 cachexia: overlap of clinical features. *Curr Opin Clin Nutr Metab Care*. 2012;15(3):213-  
7  
8  
9 3 9.  
10  
11  
12 4 [33] Yeo HJ, Byun KS, Han J, et al. Prognostic significance of malnutrition for long-  
13  
14  
15 5 term mortality in community-acquired pneumonia: a propensity score matched analysis.  
16  
17 6 *Korean J Intern Med*. 2019;34(4): 841-849.  
18  
19  
20  
21 7 [34] Washio M, Kondo K, Fujisawa N, et al. Hypoalbuminemia, influenza vaccination  
22  
23 8 and other factors related to the development of pneumonia acquired outside hospitals  
24  
25 9 in southern Japan: A case-control study. *Geriatr Gerontol Int*. 2016;16(2): 223-229.  
26  
27  
28  
29  
30 10 [35] Laur CV, McNicholl T, Valaitis R, et al. Malnutrition or frailty? Overlap and  
31  
32 11 evidence gaps in the diagnosis and treatment of frailty and malnutrition. *Appl Physiol*  
33  
34 12 *Nutr Metab*. 2017;42(5):449-58.  
35  
36  
37  
38 13 [36] Wesemann T, Nullmann H, Pflug MA, et al. Pneumonia severity, comorbidity and  
39  
40 14 1-year mortality in predominantly older adults with community-acquired pneumonia: a  
41  
42 15 cohort study. *BMC Infect Dis*. 2015;15:2.  
43  
44  
45  
46  
47 16 [37] Schoevaerdts D, Sibille FX, Gavazzi G. Infections in the older population: what do  
48  
49 17 we know? *Aging Clin Exp Res*. 2019 Oct 26.  
50  
51  
52  
53 18 [38] Choi JY, Kim SW, Yoon SJ et al. Impact of frailty on do-not-resuscitate orders and  
54  
55 19 healthcare transitions among elderly Koreans with pneumonia. *Clin Interv Aging*.  
56  
57 20 2018;1(13):2237-2245.  
58  
59  
60

- 1  
2  
3  
4 1 [39] Gonzalez-Castillo J, Martin-Sanchez FJ, Llinares P, Menendez R, Mujal A, Navas  
5  
6 2 E, et al. Guidelines for the management of community-acquired pneumonia in the  
7  
8  
9 3 elderly patient. *Rev Esp Quimioter*. 2014;27(1):69-86.  
10  
11  
12 4 [40] Rubenstein LZ, Stuck AE, Siu AL, et al. Impacts of geriatric evaluation and  
13  
14  
15 5 management programs on defined outcomes: overview of the evidence. *J Am Geriatr*  
16  
17 6 *Soc*. 1991;39(9 Pt 2):8S-16S; discussion 7S-8S.  
18  
19  
20  
21 7 [41] Hoogendijk EO, Afilalo J, Ensrud KE, et al. Frailty: implications for clinical practice  
22  
23  
24 8 and public health. *Lancet*. 2019;394(10206):1365-75.  
25  
26  
27  
28  
29  
30  
31  
32  
33  
34  
35  
36  
37  
38  
39  
40  
41  
42  
43  
44  
45  
46  
47  
48  
49  
50  
51  
52  
53  
54  
55  
56  
57  
58  
59  
60

1 Table 1. Baseline characteristics of the study population according to frailty status.

| Characteristics                     | Total cohort        | Non-frail           | Frail†              | P-values |
|-------------------------------------|---------------------|---------------------|---------------------|----------|
| N (%)                               | 256                 | 85 (33.2)           | 171 (66.8)          |          |
| Age, median (IQR)                   | 86 (81, 90)         | 83 (75, 87)         | 88 (84, 91)         | <0.001*  |
| Sex, n (%)                          |                     |                     |                     |          |
| Female                              | 76 (29.7)           | 17 (20.0)           | 59 (34.5)           | 0.017*   |
| Male                                | 180 (70.3)          | 68 (80.0)           | 112 (65.5)          |          |
| Smoking status, n (%)               |                     |                     |                     |          |
| Current                             | 29 (11.3)           | 11 (12.9)           | 18 (10.5)           | 0.288    |
| Previous                            | 71 (27.7)           | 28 (32.9)           | 43 (25.1)           |          |
| Never                               | 156 (60.9)          | 46 (54.1)           | 110 (64.3)          |          |
| BMI (kg/m <sup>2</sup> ), mean (SD) | 22.9 (4.3)          | 24.2 (3.8)          | 22.3 (4.4)          | 0.001*   |
| Barthel Index, median (IQR)         | 65 (40, 95)         | 95 (85, 100)        | 50 (20, 70)         | <0.001*  |
| CCI, median (IQR)                   | 4 (3, 5)            | 3 (2, 4)            | 4 (3, 6)            | <0.001*  |
| MNA-SF, median (IQR)                | 10 (7, 12)          | 12 (11, 14)         | 9 (7, 11)           | <0.001*  |
| Malnutrition, n (%)§                | 71 (27.7)           | 6 (7.1)             | 65 (38.0)           |          |
| SCAP‡, n (%)                        | 57 (22.3)           | 8 (9.41)            | 49 (28.65)          | <0.001*  |
| PCT (ng/mL), median (IQR)           | 0.28 (0.21, 0.44)   | 0.27 (0.20, 0.37)   | 0.29 (0.21, 0.55)   | 0.149    |
| hs-CRP (mg/L), median (IQR)         | 25.89 (5.79, 61.41) | 19.63 (4.19, 54.29) | 27.08 (7.56, 62.43) | 0.129    |

|                                         |                    |                   |                    |         |
|-----------------------------------------|--------------------|-------------------|--------------------|---------|
| WBC (*10 <sup>9</sup> /L), median (IQR) | 7.65 (5.57, 11.06) | 7.02 (5.64,9.01)  | 8.02 (5.51, 12.33) | 0.043*  |
| HGB (g/L), median (IQR)                 | 121 (108, 133)     | 127 (120, 136)    | 115 (100,128)      | <0.001* |
| Scr (μmol/L), median (IQR)              | 76.9 (61.6, 96.8)  | 78.6 (67.4, 90.5) | 75.2 (59.5, 101.6) | 0.720   |
| BUN (mmol/L), median (IQR)              | 5.98 (4.58, 7.94)  | 5.99 (4.30, 7.01) | 5.98 (4.79, 8.65)  | 0.039*  |
| ALT (U/L), median (IQR)                 | 14 (10, 22)        | 15 (11, 22)       | 13 (10, 21)        | 0.058   |
| ALB (g/L), mean (SD)                    | 32.46 (4.39)       | 34.38 (4.22)      | 31.50 (4.16)       | <0.001* |
| PA (g/L), mean (SD)                     | 16.92 (6.19)       | 18.74 (6.41)      | 15.98 (5.88)       | 0.001*  |
| 30-day mortality, n (%)                 | 14 (5.5)           | 0 (0)             | 14 (8.19)          | 0.015*  |
| 1-year mortality, n (%)                 | 43 (16.8)          | 0 (0)             | 43 (25.15)         | <0.001* |

Abbreviations: SD, standard deviation; IQR, inter-quartile range; BMI, body mass index; CCI, Charlson's Comorbidity Index; MNA-SF, Mini Nutritional Assessment-Short Form; SCAP, severe community-acquired pneumonia; PCT, procalcitonin; hs-CRP, high sensitivity C-reactive protein; WBC, white blood cell count; HGB, hemoglobin; BUN, blood urea nitrogen; Scr, serum creatinine; ALT, alanine aminotransferase; ALB, albumin; PA, prealbumin.

\* P < 0.05.

† Frailty was defined as Fried Phenotype scores ≥ 3.

‡ SCAP was defined by IDSA/ATS criteria (2007).

§ Malnutrition was defined as MNA-SF scores ≤ 7.

1 Table 2. Factors associate with 30-day and 1-year mortality in patients with community-  
2 acquired pneumonia in COX proportional hazards regression analyses (n=256).

| Variable                | Univariate |             |         | Multivariate |             |         |
|-------------------------|------------|-------------|---------|--------------|-------------|---------|
|                         | HR         | 95% CI      | P-Value | HR           | 95% CI      | P-Value |
| <b>30-day mortality</b> |            |             |         |              |             |         |
| SCAP                    | 52.01      | 6.80-398.09 | <0.001  | 30.60        | 3.77-248.06 | 0.001*  |
| BI                      | 0.99       | 0.97-1.00   | 0.101   | –            | –           | –       |
| BMI                     | 0.97       | 0.86-1.09   | 0.609   | –            | –           | –       |
| Malnutrition            | 0.84       | 0.73-0.97   | 0.015   | 1.11         | 0.90-1.35   | 0.330   |
| Frailty                 | 2.58       | 1.42-4.69   | 0.002   | 1.83         | 0.88-3.81   | 0.108   |
| CCI                     | 1.41       | 1.19-1.67   | <0.001  | 1.19         | 0.99-1.43   | 0.069   |
| <b>1-year mortality</b> |            |             |         |              |             |         |
| SCAP                    | 13.32      | 6.81-26.04  | <0.001  | 7.68         | 3.79-15.58  | <0.001* |
| BI                      | 0.98       | 0.97-0.99   | <0.001  | 1.01         | 0.99-1.02   | 0.352   |
| BMI                     | 0.93       | 0.87-1.00   | 0.038   | 1.07         | 0.98-1.16   | 0.128   |
| Malnutrition            | 0.78       | 0.72-0.85   | <0.001  | 0.94         | 0.81-1.10   | 0.424   |
| Frailty                 | 3.41       | 2.32-5.03   | <0.001  | 2.70         | 1.69-4.39   | <0.001* |
| CCI                     | 1.40       | 1.26-1.55   | <0.001  | 1.19         | 1.05-1.34   | <0.001* |

3 Data are estimated hazard ratios and 95% confidence intervals of the explanatory  
4 variables in the 30-day and 1-year mortality group. Data were adjusted for age, sex,  
5 disability, malnutrition, comorbidities, and the severity of CAP.

6 Abbreviations: HR, hazards ratio; CI, confidence interval; SCAP, severe community-  
7 acquired pneumonia; BI, Barthel Index; BMI, body mass index; CCI, Charlson's  
8 Comorbidity Index.

9 \* P < 0.05.

10

1  
2  
3  
4 1 Table 3. Factors associate with 30-day and 1-year mortality in patients with severe  
5  
6 2 community-acquired pneumonia in COX proportional hazards regression analyses  
7  
8 3 (n=57).  
9

| Variable                | Univariate |              |         | Multivariate |           |         |
|-------------------------|------------|--------------|---------|--------------|-----------|---------|
|                         | HR         | 95% CI       | P-Value | HR           | 95% CI    | P-Value |
| <b>30-day mortality</b> |            |              |         |              |           |         |
| BI                      | 1.00       | 0.99-1.02    | 0.899   | –            | –         | –       |
| BMI                     | 1.04       | 0.92-1.18    | 0.507   | –            | –         | –       |
| Malnutrition            | 0.73       | 0.24-2.23    | 0.581   | –            | –         | –       |
| Frailty                 | 26.61      | 0.04-16017.0 | 0.315   | –            | –         | –       |
| CCI                     | 1.21       | 1.02–1.43    | 0.028   | 1.21         | 1.02-1.43 | 0.028*  |
| <b>1-year mortality</b> |            |              |         |              |           |         |
| BI                      | 0.99       | 0.98–1.00    | 0.046   | 1.00         | 0.99–1.02 | 0.875   |
| BMI                     | 0.99       | 0.92-1.08    | 0.854   | –            | –         | –       |
| Malnutrition            | 0.86       | 0.77–0.97    | 0.010   | 1.05         | 0.89–1.25 | 0.545   |
| Frailty                 | 2.82       | 1.70–4.68    | <0.001  | 2.87         | 1.58–4.96 | <0.001* |
| CCI                     | 1.24       | 1.10–1.40    | 0.001   | 1.16         | 1.01–1.34 | 0.034*  |

43 4 Data are estimated hazard ratios and 95% confidence intervals of the explanatory  
44 5 variables in the 1-year mortality group. Data were adjusted for age, sex, disability,  
45 6 malnutrition, and comorbidities.

48 7 Abbreviations: HR, hazards ratio; CI, confidence interval; SCAP, severe community-  
49 8 acquired pneumonia; BI, Barthel Index; CCI, Charlson's Comorbidity Index.

51 9  
52 10 \* P < 0.05.  
53  
54  
55  
56  
57  
58  
59  
60



1  
2  
3  
4 1 Figure legend:

5 2 Figure1: Flowchart of patients excluded/included for the frailty assessment analyses

6  
7 3 in community-acquired pneumonia cohort.

8  
9 4  
10  
11  
12  
13  
14  
15  
16  
17  
18  
19  
20  
21  
22  
23  
24  
25  
26  
27  
28  
29  
30  
31  
32  
33  
34  
35  
36  
37  
38  
39  
40  
41  
42  
43  
44  
45  
46  
47  
48  
49  
50  
51  
52  
53  
54  
55  
56  
57  
58  
59  
60

For peer review only

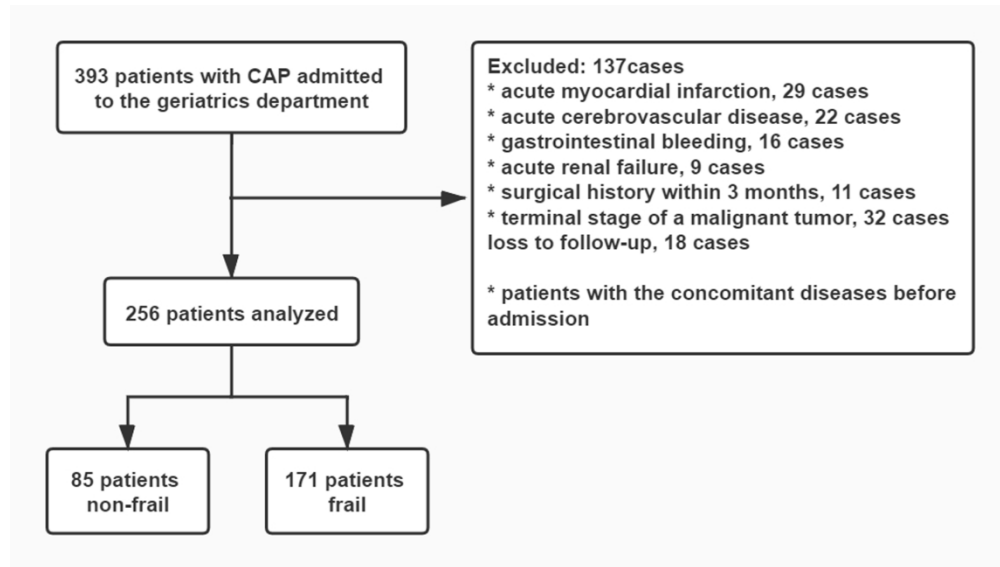

Figure1: Flowchart of patients excluded/included for the frailty assessment analyses in community-acquired pneumonia cohort.

Supplementary Table. Characteristics of severe community-acquired pneumonia<sup>‡</sup> stratified by frailty status.

| Characteristics                      | Non-frail           | Frail <sup>†</sup>  | P-values |
|--------------------------------------|---------------------|---------------------|----------|
| N, n (%)                             | 8 (14.0)            | 49 (86.0)           |          |
| Age, median (IQR)                    | 85 (82–91)          | 89 (81–92)          | 0.581    |
| Sex, n (%)                           |                     |                     |          |
| Female                               | 0 (0)               | 11 (22.5)           | 0.053    |
| Male                                 | 8 (100)             | 38 (77.6)           |          |
| BMI (kg/m <sup>2</sup> ), mean (SD)  | 22.95 (2.56)        | 21.59 (4.81)        | 0.249    |
| Barthel Index, median (IQR)          | 88 (59–99)          | 35 (8–68)           | 0.001*   |
| CCI, median (IQR)                    | 4 (2–5)             | 5 (3–8)             | 0.129    |
| MNA-SF, mean (SD)                    | 11 (3)              | 7 (3)               | 0.003*   |
| PCT (ng/mL), median (IQR)            | 0.30 (0.21–0.40)    | 0.31 (0.23–1.74)    | 0.477    |
| hs-CRP (mg/L), median (IQR)          | 33.52 (3.65–154.94) | 34.42 (19.08–89.78) | 0.928    |
| WBC (*10 <sup>9</sup> /L), mean (SD) | 8.45 (2.53)         | 10.83 (5.27)        | 0.218    |
| HGB (g/L), median (IQR)              | 122 (106–146)       | 114 (93–123)        | 0.179    |
| Scr (μmol/L), median (IQR)           | 103.5 (88.5–121.1)  | 82.6 (62.1–114.8)   | 0.161    |
| BUN (mmol/L), median (IQR)           | 8.35 (6.86–9.49)    | 7.98 (5.67–12.07)   | 0.730    |
| ALT (U/L), median (IQR)              | 16 (10–27)          | 13 (10–20)          | 0.557    |
| ALB (g/L), median (IQR)              | 33.10 (31.75–34.38) | 30.00 (27.35–32.85) | 0.039*   |
| PA (g/L), mean (SD)                  | 18.56 (9.60)        | 14.44 (5.85)        | 0.118    |
| 30-day mortality, n (%)              | 0 (0)               | 13 (26.53)          | 0.034*   |
| 1-year mortality, n (%)              | 0 (0)               | 31 (63.27)          | <0.001*  |

Abbreviations: SD, standard deviation; IQR, inter-quartile range; BMI, body mass index; CCI, Charlson's Comorbidity Index; MNA-SF, Mini Nutritional Assessment-Short Form; PCT, procalcitonin; hs-CRP, high-sensitivity C-reactive

1  
2  
3 protein; WBC, white blood cell count; HGB, hemoglobin; BUN, blood urea nitrogen;  
4 Scr, serum creatinine; ALT, alanine aminotransferase; ALB, albumin; PA, prealbumin.  
5

6 \* P < 0.05.  
7

8 † Frailty was defined as Fried Phenotype scores  $\geq 3$ .  
9

10 ‡ Defined by IDSA/ATS criteria (2007).  
11  
12  
13  
14  
15  
16  
17  
18  
19  
20  
21  
22  
23  
24  
25  
26  
27  
28  
29  
30  
31  
32  
33  
34  
35  
36  
37  
38  
39  
40  
41  
42  
43  
44  
45  
46  
47  
48  
49  
50  
51  
52  
53  
54  
55  
56  
57  
58  
59  
60

For peer review only

# BMJ Open

## Impact of frailty on 30-day and 1-year mortality in hospitalized elderly patients with community-acquired pneumonia: a prospective observational study

|                                 |                                                                                                                                                                                                                                                                                                                                                                                                                                       |
|---------------------------------|---------------------------------------------------------------------------------------------------------------------------------------------------------------------------------------------------------------------------------------------------------------------------------------------------------------------------------------------------------------------------------------------------------------------------------------|
| Journal:                        | <i>BMJ Open</i>                                                                                                                                                                                                                                                                                                                                                                                                                       |
| Manuscript ID                   | bmjopen-2020-038370.R4                                                                                                                                                                                                                                                                                                                                                                                                                |
| Article Type:                   | Original research                                                                                                                                                                                                                                                                                                                                                                                                                     |
| Date Submitted by the Author:   | 03-Sep-2020                                                                                                                                                                                                                                                                                                                                                                                                                           |
| Complete List of Authors:       | luo, jia; Capital Medical University Affiliated Beijing Friendship Hospital, Geriatric department;<br>Tang, Wen; Capital Medical University Affiliated Beijing Friendship Hospital, Department of Geriatrics<br>Ying, Sun; Capital Medical University Affiliated Beijing Friendship Hospital, Department of Geriatrics<br>Jiang, Chunyan; Capital Medical University Affiliated Beijing Friendship Hospital, Department of Geriatrics |
| <b>Primary Subject Heading</b>: | Geriatric medicine                                                                                                                                                                                                                                                                                                                                                                                                                    |
| Secondary Subject Heading:      | Respiratory medicine, Medical management, Infectious diseases                                                                                                                                                                                                                                                                                                                                                                         |
| Keywords:                       | GERIATRIC MEDICINE, INTERNAL MEDICINE, Respiratory infections < THORACIC MEDICINE, RESPIRATORY MEDICINE (see Thoracic Medicine)                                                                                                                                                                                                                                                                                                       |
|                                 |                                                                                                                                                                                                                                                                                                                                                                                                                                       |

SCHOLARONE™  
Manuscripts



I, the Submitting Author has the right to grant and does grant on behalf of all authors of the Work (as defined in the below author licence), an exclusive licence and/or a non-exclusive licence for contributions from authors who are: i) UK Crown employees; ii) where BMJ has agreed a CC-BY licence shall apply, and/or iii) in accordance with the terms applicable for US Federal Government officers or employees acting as part of their official duties; on a worldwide, perpetual, irrevocable, royalty-free basis to BMJ Publishing Group Ltd ("BMJ") its licensees and where the relevant Journal is co-owned by BMJ to the co-owners of the Journal, to publish the Work in this journal and any other BMJ products and to exploit all rights, as set out in our [licence](#).

The Submitting Author accepts and understands that any supply made under these terms is made by BMJ to the Submitting Author unless you are acting as an employee on behalf of your employer or a postgraduate student of an affiliated institution which is paying any applicable article publishing charge ("APC") for Open Access articles. Where the Submitting Author wishes to make the Work available on an Open Access basis (and intends to pay the relevant APC), the terms of reuse of such Open Access shall be governed by a Creative Commons licence – details of these licences and which [Creative Commons](#) licence will apply to this Work are set out in our licence referred to above.

Other than as permitted in any relevant BMJ Author's Self Archiving Policies, I confirm this Work has not been accepted for publication elsewhere, is not being considered for publication elsewhere and does not duplicate material already published. I confirm all authors consent to publication of this Work and authorise the granting of this licence.

1 Impact of frailty on 30-day and 1-year mortality in hospitalized elderly patients with  
2 community-acquired pneumonia: a prospective observational study

3 Jia Luo, MD; Wen Tang\*, MD, PhD; Ying Sun, MD, PhD; Chun-Yan Jiang, MD, PhD.

4 Department of Geriatrics, Beijing Friendship Hospital, Capital Medical University,  
5 Beijing, 100050, People's Republic of China

6 **Corresponding Author:** Wen Tang, MD, PhD. Department of Geriatrics, Beijing  
7 Friendship Hospital, Capital Medical University. Postal address: No. 95, Yong'an Road,  
8 Xicheng District, Beijing 100050, PR China. Email: twybx@163.com. Tel: + (86  
9 10) 63137642 / +86 15810683607. Fax: + (86 10) 63138795.

10 **The first author:** Jia Luo, MD; Department of Geriatrics, Beijing Friendship Hospital,  
11 Capital Medical University. E-mail: ann11121112@sina.com.

12 **The co-authors:** Ying Sun, MD, PhD; Department of Geriatrics, Beijing Friendship  
13 Hospital, Capital Medical University. E-mail: ysun15@163.com.

14 Chun-Yan Jiang, MD, PhD; Department of Geriatrics, Beijing Friendship Hospital,  
15 Capital Medical University. E-mail: jchy12368@sina.com.

16 **Short title:** Impact of frailty on community-acquired pneumonia

17 **Word count:** Abstract—291; Manuscript--2382

18 **Keywords:** Community-acquired pneumonia; Frailty; Elderly; Prognosis.

19

1  
2  
3 **1 Abstract**  
4

5  
6 **2 Objectives:** This study evaluates the impact of frailty, which is a state of increased  
7  
8  
9  
10  
11  
12  
13  
14  
15  
16  
17  
18  
19  
20  
21  
22  
23  
24  
25  
26  
27  
28  
29  
30  
31  
32  
33  
34  
35  
36  
37  
38  
39  
40  
41  
42  
43  
44  
45  
46  
47  
48  
49  
50  
51  
52  
53  
54  
55  
56  
57  
58  
59  
60  
**3** vulnerability to stressors, on 30-day and 1-year mortality among elderly patients with  
**4** community-acquired pneumonia (CAP). The main hypothesis is that frailty is an  
**5** independent predictor of prognosis in elderly CAP patients.

**6 Design:** Prospective, observational, follow-up cohort study.

**7 Setting:** A 2000-bed tertiary care hospital in Beijing, China.

**8 Participants:** Consecutive CAP patients aged  $\geq 65$  years admitted to the geriatric  
9 department of our hospital between September 2017 and February 2019.

**10 Main outcome measures:** The primary outcomes were all-cause mortality at 30 days  
11 and 1 year after hospital admission. The impact of frailty (defined by Frailty Phenotype)  
12 on 30-day and 1-year mortality of elderly patients with CAP was assessed by Cox  
13 regression analysis.

**14 Results:** The cohort included 256 patients. The median (IQR) age was 86 (81, 90)  
15 years, and 180 (70.3%) participants were men. A total of 171/256 (66.8%) patients  
16 were frail. The prevalence of frailty was significantly associated with older age, female  
17 gender, lower BMI, comorbidities, limitations in activities of daily living, and poor  
18 nutritional status. Frail participants were significantly more likely to have severe CAP  
19 than non-frail counterparts (28.65% vs. 9.41%,  $P < 0.001$ ). The 1-year mortality risk was  
20 approximately three-fold higher in frail patients (adjusted HR, 2.70; 95% CI, 1.69-4.39)  
21 than non-frail patients. Subgroup analysis of patients with severe CAP showed that the



1 1-year mortality risk was approximately three-fold higher in the frail group (adjusted  
2 HR, 2.87; 95% CI, 1.58-4.96) than in the non-frail group. The association between  
3 frailty and 30-day mortality was not significant.

4 **Conclusions:** These findings suggest that frailty is strongly associated with severe  
5 CAP and higher 1-year mortality in elderly patients with CAP, and frailty should be  
6 detected early to improve the management of these patients.

7 **Keywords:** Community-acquired pneumonia; Frailty; Elderly; Prognosis.

#### 8 **Strengths and limitations of this study**

- 9 1. This is a prospective cohort study, included the comprehensive scope of prognostic  
10 factors (frailty, age, disability, undernutrition, comorbidities, and disease severity) for  
11 patients with community-acquired pneumonia (CAP).
- 12 2. Results of this study may contribute to a better understanding of the risk profile of  
13 frail older adults hospitalized with CAP.
- 14 3. Frailty was defined by Fried's Frailty Phenotype, which is well validated and simple  
15 to use.
- 16 4. The study was conducted in a single center and evaluated a small number of end-  
17 points.
- 18 5. The study included a small sample of older patients and did not evaluate the  
19 association between frailty and CAP in outpatients.

## 1 Introduction

2 Community-acquired pneumonia (CAP) is the most prevalent infectious disease in  
3 the elderly and is associated with high rates of mortality, morbidity, and high costs  
4 worldwide.<sup>[1, 2, 3, 4]</sup> In the United States, the incidence of CAP in the age group 65–79  
5 years is 63 cases per 10,000 adults and increases to 164.3 cases per 10,000 adults in  
6 the age group >80 years.<sup>[5]</sup> Mortality from CAP increases with age. In 2012, the  
7 average mortality from pneumonia was 17.46 cases per 100,000 in all age groups in  
8 China, 23.55 cases per 100,000 in the age group 65–69 years, and nearly 36 times  
9 higher in the age group >85 years.<sup>[6]</sup>

10 Studies have shown that age, functional status, comorbidities, and malnutrition are  
11 strongly associated with poor prognosis in CAP patients,<sup>[4,6,7,8,9,10]</sup> and higher mortality  
12 in elderly patients with CAP underscores the need to identify novel, modifiable risk  
13 factors for poor outcomes. Particular attention has recently been directed to frail elderly  
14 patients. Frailty is associated with disabilities, comorbidities, and old age and is defined  
15 as a cumulative decline in multiple organ systems and loss of physiological reserves,  
16 increasing the vulnerability to adverse outcomes, including falls, hospitalization, and  
17 mortality.<sup>[11,12,13]</sup> Moreover, frailty is an independent risk factor for mortality in patients  
18 with acute and chronic diseases.<sup>[14,15]</sup> A European multicenter study assessed the  
19 impact of frailty (measured by the Clinical Frailty Scale) on intensive care unit (ICU)  
20 admission and 30-day mortality in 5021 elderly patients and observed that frailty was  
21 found in 43% of these patients and was independently related to 30-day survival  
22 (hazard ratio [HR], 1.54; 95% confidence interval [CI], 1.38-1.73, frail versus non-frail

1 patients).<sup>[16]</sup> A study evaluated the relationship between frailty and CAP in older  
2 patients and found that frailty was associated with increased hospitalization at 28 days  
3 after CAP diagnosis<sup>[17]</sup> and significantly predicted the risk of 1-month mortality.<sup>[18]</sup>  
4 Therefore, we hypothesized that frailty is positively correlated with CAP severity and  
5 mortality in elderly patients.

6 The objective of this study was to assess the prevalence of frailty in older patients  
7 with CAP, the association between frailty and CAP severity, and 30-day and 1-year  
8 mortality. This information may be useful for the early stratification of high-risk patients  
9 and the hierarchical management of modifiable factors to improve the prognosis of  
10 elderly patients with CAP.

## 11 Methods

### 12 1. Study design

13 We prospectively and consecutively enrolled elderly patients (aged  $\geq 65$  years)  
14 diagnosed with CAP in the geriatric department of our institution from September 2017  
15 to February 2019. The exclusion criteria were complications, such as acute myocardial  
16 infarction, acute cerebrovascular disease, gastrointestinal bleeding, or acute renal  
17 failure; surgical history within 3 months; and terminal stage of a malignant tumor  
18 (Figure 1).

19 CAP was defined as pneumonia acquired outside the hospital by an  
20 immunocompetent individual. The criteria for diagnosing CAP were community-onset  
21 and the presence of new infiltrates on chest X-ray or computed tomography scan

1  
2  
3  
4 1 together with at least one of the following conditions: (i) new or increased cough  
5  
6 2 (productive, nonproductive, or accompanied by a change in sputum characteristics)  
7  
8  
9 3 with or without dyspnea, chest pain, or hemoptysis; (ii) fever; (iii) rales and/or signs of  
10  
11 4 consolidation; (iv) peripheral WBC count  $>10,000$  cells  $\text{mm}^{-3}$  or  $<4000$  cells  $\text{mm}^{-3}$  with  
12  
13  
14 5 or without an increase in immature forms. Differential diagnosis included tuberculosis,  
15  
16 6 lung cancer, noninfectious pulmonary interstitial disease, pulmonary edema,  
17  
18 7 atelectasis, pulmonary embolism, pulmonary eosinophilic infiltration, and pulmonary  
19  
20 8 vasculitis. The patients with these diagnoses were excluded.<sup>[6]</sup>  
21  
22  
23  
24  
25

## 26 9 2. Baseline characteristics

27  
28  
29 10 The following parameters were evaluated within 24 hours of admission: age, sex,  
30  
31 11 body mass index (BMI), smoking history, procalcitonin (PCT), high-sensitivity C-  
32  
33 12 reactive protein (hs-CRP), white blood count (WBC), hemoglobin (HGB), alanine  
34  
35 13 aminotransferase (ALT), albumin (ALB), prealbumin (PA), serum creatinine (Scr), and  
36  
37 14 blood urea nitrogen (BUN). A comprehensive geriatric assessment (CGA), including  
38  
39 15 frailty, comorbidities, and functional and nutritional status, was conducted by trained  
40  
41 16 evaluators within 24 hours of admission.  
42  
43  
44  
45  
46  
47

## 48 17 3. Severity of CAP

49  
50  
51 18 Severe CAP (SCAP) was diagnosed according to criteria established by the  
52  
53 19 Infectious Diseases Society of America and the American Thoracic Society,<sup>[19]</sup> and at  
54  
55 20 least one major criterion or three minor criteria should be satisfied. The major criteria  
56  
57 21 were the need for mechanical ventilation or the diagnosis of septic shock. The minor  
58  
59  
60

1  
2  
3  
4 1 criteria were respiratory rate >130 breaths/min, arterial oxygen pressure/fraction of  
5  
6 2 inspired oxygen ratio <250 mmHg, multilobar infiltrates, confusion, BUN level >120  
7  
8  
9 3 mg/dL, leukopenia resulting from infection, thrombocytopenia, hypothermia, or  
10  
11 4 hypotension requiring aggressive fluid resuscitation.  
12  
13

#### 15 4. Assessment of frailty

16  
17  
18 6 Frailty was assessed using the following Frailty Phenotype (FP) criteria:  
19  
20 7 unintentional weight loss (4.5kg in the past 12 months), self-reported exhaustion,  
21  
22 8 weakness (reduced grip strength), slow walking speed, and low physical activity.<sup>[20]</sup>  
23  
24 9 The cut-off values were consistent with the original criteria. Each construct was  
25  
26 10 considered present (score of 1) or absent (score of 0). The total score ranged from 0  
27  
28 11 to 5. As established previously, the presence and absence of frailty were defined as a  
29  
30 12 score of  $\geq 3$  and  $\leq 2$ , respectively.  
31  
32  
33  
34  
35  
36  
37

#### 38 5. Covariates

39  
40  
41 14 Comorbidity was evaluated with the Charlson Comorbidity Index (CCI).<sup>[21]</sup> The CCI  
42  
43 15 is the sum of the weighted scores of the following chronic medical conditions: ischemic  
44  
45 16 heart disease, congestive heart failure, cerebrovascular accident, peripheral vascular  
46  
47 17 diseases, chronic lung diseases, diabetes, dementia, connective tissue diseases, renal  
48  
49 18 diseases, liver diseases, hemiplegia, solid or hematological malignancy, and acquired  
50  
51 19 immunodeficiency disease. A score of 1, 2, 3, or 6 is assigned to each disease,  
52  
53 20 depending on severity.  
54  
55  
56  
57  
58  
59  
60

21 Functional status was assessed by evaluating patients' ability to perform activities

1 of daily living (ADLs) using the Barthel Index (BI).<sup>[22]</sup>

2 Nutritional status was assessed using the Mini Nutritional Assessment-Short Form  
3 questionnaire.<sup>[23]</sup> This questionnaire evaluates BMI, weight loss in the past 3 months,  
4 dietary changes, stress or acute illness, degree of mobility, and neuropsychiatric  
5 diseases. The total score is 14 points, and scores of 0-7 indicate malnutrition.

## 6 5. Follow-up and outcomes

7 All patients were followed for 1 year after hospital admission. Deaths were  
8 confirmed through surveillance or official death records. The primary outcomes were  
9 all-cause mortality at 30 days and 1 year after admission.

## 10 6. Statistical analysis

11 Statistical analyses were performed using IBM SPSS software version 23.0  
12 (Chicago, USA). Continuous variables were expressed as the means  $\pm$  standard  
13 deviation (SD) or interquartile range (IQR) and compared using Student's t-test or the  
14 Mann-Whitney U test. Categorical variables were compared using the chi-squared test  
15 or Fisher's exact test. The association between baseline frailty status and 30-day and  
16 1-year all-cause mortality was analyzed using univariate and multivariate Cox  
17 proportional hazards regression models, and the results were expressed as hazard  
18 ratio (HR) and 95% confidence interval (CI). A two-tailed p-value of less than 0.05 was  
19 considered to indicate a statistically significant difference.

## 20 Patient and public involvement

1 Patients and the public were not involved in the study design, recruitment, or  
2 execution, and the participants were not be involved in disseminating the results. The  
3 study results will be provided to patients upon request, and aggregated data will be  
4 reported in project reports and research publications and meetings.

## 5 Results

6 In our cohort, 393 older patients with CAP were admitted to our department during  
7 the study period. Of these, 119 patients were excluded because of concomitant  
8 diseases, and 18 were lost to follow-up (Figure 1). A total of 256 patients with CAP  
9 aged 65-99 years were included in the final analysis. Demographic characteristics are  
10 presented in Table 1. The median age of the cohort was 86 (IQR, 81–90) years, and  
11 180 (70.3%) patients were men. A total of 171 (66.8%) participants were frail, 71  
12 (27.7%) patients were malnourished, and 57 (22.3%) participants had SCAP. All-cause  
13 mortality at 30 days and 1 year was 5.5% and 16.8%, respectively.

14 Frailty was significantly associated with older age, female gender, lower BMI,  
15 limitations in ADLs, comorbidities, and poor nutritional status. Frail participants were  
16 significantly more likely to have SCAP than non-frail counterparts (28.65% vs. 9.41%,  
17  $P<0.001$ ). Thirty-day and 1-year mortality was significantly higher in frail patients (0 vs.  
18 8.19%,  $P=0.015$ ; and 0 vs. 25.25%,  $P<0.001$ , respectively). The results of Cox  
19 proportional hazards regression are presented in Table 2. SCAP, frailty, malnutrition,  
20 and CCI were significantly associated with 30-day mortality in the univariate analysis,  
21 but only SCAP remained significant in the multivariate analysis (adjusted HR, 30.60;

1 95% CI, 3.77-248.06). The factors associated with 1-year mortality in the multivariable  
2 analysis were SCAP (adjusted HR, 7.68; 95% CI, 3.79-15.58), frailty (adjusted HR,  
3 2.70; 95% CI, 1.69-4.39), and CCI (adjusted HR, 1.19; 95% CI, 1.05-1.34).

4 Subgroup analysis of patients with SCAP by frailty status showed that eight (14%)  
5 patients were non-frail and 49 patients (86%) were frail. The frail group presented  
6 significantly worse functional and nutritional status and higher 30-day and 1-year  
7 mortality (Supplementary Table). In the multivariate analysis of patients with SCAP, 1-  
8 year mortality risk was approximately three-fold higher in the frail group (adjusted HR,  
9 2.87; 95% CI, 1.58-4.96) than in the non-frail group, and 1-year mortality risk was 16%  
10 higher among those with more comorbidities (adjusted HR, 1.16; 95% CI, 1.01-1.34)  
11 (Table 3). Only CCI was significantly correlated with 30-day mortality (HR, 1.21; 95%  
12 CI, 1.02-1.43).

### 13 Discussion

14 The results showed that frail older patients with CAP were significantly more likely  
15 to have SCAP and had a significantly higher 30-day and 1-year mortality risk than non-  
16 frail patients. In addition, frailty was an independent risk factor for 1-year mortality after  
17 adjusting for age, sex, disability, malnutrition, comorbidities, and CAP severity but was  
18 not an independent risk factor for 30-day mortality.

19 The incidence of CAP increases with age, and CAP increases the risk of morbidity  
20 and mortality. Mortality is significantly higher in elderly patients with CAP than in the  
21 general population.<sup>[4,9]</sup> All-cause mortality at 30 days and 1 year among elderly patients



1 with CAP in our cohort was 5.5% and 16.8%, respectively. Known independent  
2 prognostic factors for CAP mortality are age, comorbidities, functional status, microbial  
3 etiology, and early antibiotic treatment.<sup>[9,10,24,25]</sup> However, some studies reported that  
4 age *per se* was not an independent predictor of CAP mortality in the elderly population  
5 with pneumonia.<sup>[26,27]</sup> Frailty is an age-related disease associated with disabilities,  
6 comorbidities, and advanced age, and is characterized by a decline in physiological  
7 functions across multiple organ systems and increased vulnerability to stressors,<sup>[20,28,29]</sup>  
8 which increases the risk of adverse health outcomes, including falls, disability,  
9 hospitalization, institutionalization, and death. Various conditions, including  
10 malnutrition, sarcopenia, gait impairment, chronic inflammation, polypharmacy,  
11 cardiovascular changes, and morbidity, may cause frailty.<sup>[30,31,32]</sup> Accordingly, in our  
12 sample, all patients who died within 30 days or 1 year were frail.

13 Frailty was more prevalent in women in our study, which is consistent with a previous  
14 study.<sup>[30]</sup> In addition, frail patients had significantly older age, more comorbidities, poor  
15 nutritional and functional status, and limited ability to perform ADLs. Poor nutritional  
16 status, including hypoalbuminemia, hypoproteinemia, malnourishment, and a low  
17 nutritional score, is a strong predictor of mortality in CAP patients.<sup>[33,34]</sup> However, in our  
18 cohort, there was no significant association between nutritional status and 30-day or  
19 1-year mortality in the multivariate analysis (adjusted HR, 1.11; 95% CI, 0.90-1.35;  
20 adjusted HR, 0.94; 95% CI, 0.81-1.10, respectively). Some studies have shown that  
21 the definition, diagnosis, and treatment of frailty and malnutrition overlap.<sup>[30,32,35]</sup>  
22 Malnutrition is a physiological condition that predisposes to the occurrence and

1 development of frailty.<sup>[31]</sup> In our study, frailty was defined as a syndrome that affects  
2 multiple organ systems and was a strong predictor of long-term mortality, and this  
3 multidimensional nature may explain why frailty, but not malnutrition and disability, was  
4 significantly associated with higher mortality in the multivariate analysis.

5 Our results indicated that frailty was common in elderly patients with CAP  
6 (prevalence of 66.8%) and was closely linked to pneumonia severity; furthermore,  
7 frailty increased 1-year mortality risk nearly three-fold compared with the absence of  
8 frailty (adjusted HR, 2.70; 95% CI, 1.69-4.39). A study evaluated patient outcomes at  
9 1 year after the diagnosis of CAP and showed that age  $\geq 65$  years, nursing home  
10 residency, and comorbidity were positively associated with 1-year mortality.<sup>[36]</sup> Another  
11 study found that the risk of CAP mortality was more strongly correlated with underlying  
12 diseases than with CAP severity.<sup>[25]</sup> However, these studies did not assess the effect  
13 of frailty on CAP prognosis. The results of our study demonstrated that frailty was  
14 independently associated with 1-year mortality after adjusting for risk factors,  
15 suggesting that frailty could accurately predict adverse outcomes.

16 Our findings suggest that frail patients are more likely to have SCAP, and frailty is  
17 positively correlated to the risk of 1-year mortality. Since the clinical presentation of  
18 pneumonia may be atypical in the elderly, clinicians should suspect pneumonia in the  
19 presence of symptoms such as falls, altered mental status, fatigue, delirium, and  
20 anorexia to avoid complications associated with delayed diagnosis and therapy.<sup>[37]</sup>  
21 With respect to clinical decision-making and planning of health services, it is important  
22 to identify frailty in elderly CAP patients to better stratify the risk of adverse outcomes

1 and implement treatments tailored to individual needs, weighing up the risks and  
2 benefits of invasive diagnostic procedures and therapies, as well as taking into account  
3 end of life care needs for individuals with advanced frailty. A Korean study found that  
4 frailty was independently associated with do-not-resuscitate orders and healthcare  
5 transitions, even after adjusting for sepsis and pneumonia severity.<sup>[38]</sup> An international  
6 multidisciplinary group proposed a CGA<sup>[39]</sup> adapted to the emergency department  
7 context to assess frailty in elderly patients.<sup>[16,40]</sup> Although many physicians and  
8 intensivists do not currently perform CGAs in critically ill patients with infectious  
9 diseases, demographic shifts may require addressing this issue promptly. Moreover,  
10 frailty is a dynamic state and can be reversed.<sup>[41]</sup> Preventing frailty is possible,  
11 especially during onset, and the early diagnosis of this condition is crucial to improve  
12 therapeutic efficacy and the post-discharge management of elderly patients with  
13 CAP.<sup>[11]</sup>

14 This study has limitations. First, the results were not compared with data from other  
15 hospitals and regions. Second, the number of patients and end-point events was small.  
16 Third, the study did not evaluate the association between frailty and CAP in outpatients;  
17 therefore, the results cannot be generalized to other patient groups.

18 This study adjusted for confounding factors and demonstrated that frailty strongly  
19 affected the long-term prognosis of CAP patients. These data can contribute to the  
20 long-term management of frailty in CAP patients.

21 Conclusions

1 Frailty is very common in elderly patients with CAP and increases the risk of 1-year  
2 mortality from CAP and SCAP. Our findings suggest that frailty should be evaluated in  
3 routine clinical practice to improve the post-discharge management of older patients  
4 with CAP.

5 **Contributors** Jia Luo, Wen Tang, Ying Sun, and Chun-Yan Jiang conceived and  
6 designed the study. Jia Luo and Wen Tang collected data. Wen Tang, Ying Sun, and  
7 Chun-Yan Jiang analyzed and interpreted data. Jia Luo and Wen Tang wrote the  
8 manuscript. All authors approved the final manuscript.

9 **Funding sources:** This work was supported by the Beijing Municipal Administration  
10 of Hospitals Clinical Medicine Development of Special Funding Support (Process No.  
11 ZYLX201838) and the Beijing Friendship Hospital of Capital Medical University  
12 Hospital Startup Funding (Process No. yyqdk2017-37).

13 **Competing interests:** none declared.

14 **Ethical approval:** This study was approved by the research ethics committee of  
15 Beijing Friendship Hospital and Capital Medical University and conformed to the ethical  
16 guidelines of the Declaration of Helsinki (Project No. 2018-P2-138-01). All patients  
17 provided informed consent before the commencement of the study.

18 **Data sharing:** Data are available with the first author (e-mail:  
19 [ann11121112@sina.com](mailto:ann11121112@sina.com)).

20 References

- 1  
2  
3  
4 [1] Prina E, Ranzani OT, Torres A. Community-acquired pneumonia. *Lancet*.  
5  
6 2015;386(9998):1097-108.  
7  
8  
9  
10 [2] Song JH, Huh K, Chung DR. Community-Acquired Pneumonia in the Asia-Pacific  
11  
12 Region. *Semin Respir Crit Care Med*. 2016;37(6):839-54.  
13  
14  
15  
16 [3] Chalmers J, Campling J, Ellsbury G, et al. Community-acquired pneumonia in the  
17  
18 United Kingdom: a call to action. *Pneumonia (Nathan)*. 2017; 9:15.  
19  
20  
21  
22 [4] Cilloniz C, Rodriguez-Hurtado D, Torres A. Characteristics and Management of  
23  
24 Community-Acquired Pneumonia in the Era of Global Aging. *Med Sci (Basel)*.  
25  
26 2018;6(2):35.  
27  
28  
29  
30 [5] Jain S, Self WH, Wunderink RG, et al. Community-Acquired Pneumonia Requiring  
31  
32 Hospitalization among U.S. Adults[J]. *N Engl J Med*,2015,373(5):415-427.  
33  
34  
35  
36 [6] Cao B, Huang Y, She DY, et al. Diagnosis and treatment of community-acquired  
37  
38 pneumonia in adults: 2016 clinical practice guidelines by the Chinese Thoracic Society,  
39  
40 Chinese Medical Association. *Clin Respir J*. 2018;12(4):1320-60.  
41  
42  
43  
44  
45 [7] Almirall J, Serra-Prat M, Bolibar I, et al. Risk Factors for Community-Acquired  
46  
47 Pneumonia in Adults: A Systematic Review of Observational Studies. *Respiration*.  
48  
49 2017;94(3):299-311.  
50  
51  
52  
53 [8] Yeo HJ, Byun KS, Han J, et al. Prognostic significance of malnutrition for long-term  
54  
55 mortality in community-acquired pneumonia: a propensity score matched analysis.  
56  
57  
58  
59 Korean J Intern Med. 2019;34(4):841-9.  
60

- 1  
2  
3  
4 1 [9] Cilloniz C, Polverino E, Ewig S, et al. Impact of age and comorbidity on cause and  
5  
6  
7 2 outcome in community-acquired pneumonia. *Chest*. 2013;144(3):999-1007.  
8  
9  
10 3 [10] Klausen HH, Petersen J, Lindhardt T, et al. Outcomes in elderly Danish citizens  
11  
12 4 admitted with community-acquired pneumonia. Regional differences, in a public  
13  
14 5 healthcare system. *Respir Med*. 2012;106(12):1778-87.  
15  
16  
17  
18 6 [11] Hoogendijk EO, Afilalo J, Ensrud KE, et al. Frailty: implications for clinical practice  
19  
20 7 and public health. *Lancet*. 2019;394(10206):1365-75.  
21  
22  
23  
24 8 [12] Chang SF, Lin PL. Frail phenotype and mortality prediction: a systematic review  
25  
26 9 and meta-analysis of prospective cohort studies. *Int J Nurs Stud*. 2015;52(8):1362-  
27  
28 10 1374.  
29  
30  
31  
32  
33 11 [13] Dent E, Martin FC, Bergman H, et al. Management of frailty: opportunities,  
34  
35 12 challenges, and future directions. *Lancet*. 2019;394(10206): 1376-1386.  
36  
37  
38  
39 13 [14] Costa D, Aladio M, Girado C A, et al. Frailty is independently associated with 1-  
40  
41 14 year mortality after hospitalization for acute heart failure. *Int J Cardiol Heart Vasc*.  
42  
43 15 2018;7(21):103-106.  
44  
45  
46  
47  
48 16 [15] Walker SR, Gill K, Macdonald K, et al. Association of frailty and physical function  
49  
50 17 in patients with non-dialysis CKD: a systematic review. *BMC Nephrol*. 2013; 14:228.  
51  
52  
53  
54 18 [16] Flaatten H, De Lange DW, Morandi A, et al. The impact of frailty on ICU and 30-  
55  
56 19 Day mortality and the level of care in very elderly patients ( $\geq 80$  Years). *Intensive Care*  
57  
58 20 *Med*. 2017;43(12): 1820–1828.  
59  
60

- 1  
2  
3  
4 1 [17] Millett ER, De Stavola BL, Quint JK, et al. Risk factors for hospital admission in  
5  
6 2 the 28 days following a community-acquired pneumonia diagnosis in older adults, and  
7  
8  
9 3 their contribution to increasing hospitalization rates over time: a cohort study. *BMJ*  
10  
11 4 *Open*. 2015;5(12): e008737.
- 15 5 [18] Pilotto A, Dini S, Daragjati J, et al. Combined use of the multidimensional  
16  
17 6 prognostic index (MPI) and procalcitonin serum levels in predicting 1-month mortality  
18  
19 7 risk in older patients hospitalized with community-acquired pneumonia (CAP): a  
20  
21 8 prospective study. *Aging Clin Exp Res*. 2018;30(2):193-197.
- 26 9 [19] Mandell LA, Wunderink RG, Anzueto A, et al. Infectious Diseases Society of  
27  
28 10 America/American Thoracic Society consensus guidelines on the management of  
29  
30 11 community-acquired pneumonia in adults. *Clin Infect Dis*. 2007;44 Suppl 2:S27-72.
- 35 12 [20] Fried LP, Tangen CM, Walston J, et al. Frailty in older adults: evidence for a  
36  
37 13 phenotype. *J Gerontol A Biol Sci Med Sci*. 2001;56(3):M146-56.
- 41 14 [21] Charlson ME, Pompei P, Ales KL, et al. A new method of classifying prognostic  
42  
43 15 comorbidity in longitudinal studies: development and validation. *J Chronic Dis*.  
44  
45 16 1987;40(5):373-83.
- 49 17 [22] Mahoney FI, Barthel DW. Functional Evaluation: The Barthel Index. *Md State Med*  
50  
51 18 *J*. 1965;14:61-5.
- 55 19 [23] Rubenstein LZ, Harker JO, Salvà A, et al. Screening for undernutrition in geriatric  
56  
57 20 practice: developing the short-form mini-nutritional assessment (MNA-SF). *J Gerontol*

- 1  
2  
3  
4 1 A Biol Sci Med Sci. 2001 Jun;56(6):M366-72.  
5  
6  
7 2 [24] Luna CM, Palma I, Niederman MS, et al. The Impact of Age and Comorbidities on  
8  
9  
10 3 the Mortality of Patients of Different Age Groups Admitted with Community-acquired  
11  
12  
13 4 Pneumonia. Ann Am Thorac Soc. 2016;13(9):1519-26.  
14  
15  
16 5 [25] Weir DL, Majumdar SR, McAlister FA, et al. The impact of multimorbidity on short-  
17  
18  
19 6 term events in patients with community-acquired pneumonia: prospective cohort study.  
20  
21  
22 7 Clin Microbiol Infect. 2015;21(3):264 e7-e13.  
23  
24  
25 8 [26] Chen J, Chang S, Liu J, et al. Comparison of clinical characteristics and  
26  
27  
28 9 performance of pneumonia severity score and CURB-65 among younger adults,  
29  
30  
31 10 elderly and very old subjects. Thorax. 2010;65(11): 971-977.  
32  
33  
34 11 [27] Simonetti AF, Viasus D, Garcia-Vidal C, Carratala J. Management of community-  
35  
36  
37 12 acquired pneumonia in older adults. Ther Adv Infect Dis. 2014;2(1):3-16.  
38  
39  
40 13 [28] Morley JE, Vellas B, van Kan GA, et al. Frailty consensus: a call to action. J Am  
41  
42  
43 14 Med Dir Assoc. 2013;14(6):392-7.  
44  
45  
46 15 [29] Dent E, Martin FC, Bergman H, et al. Management of frailty: opportunities,  
47  
48  
49 16 challenges, and future directions. Lancet. 2019;394(10206): 1376-1386.  
50  
51  
52 17 [30] Collard RM, Boter H, Schoevers RA, et al. Prevalence of frailty in community-  
53  
54  
55 18 dwelling older persons: a systematic review. J Am Geriatr Soc. 2012;60(8):1487-92.  
56  
57  
58 19 [31] Lorenzo-Lopez L, Maseda A, de Labra C, et al. Nutritional determinants of frailty  
59  
60 20 in older adults: A systematic review. BMC Geriatr. 2017;17(1):108.



- 1  
2  
3  
4 1 [32] Jeejeebhoy KN. Malnutrition, fatigue, frailty, vulnerability, sarcopenia and  
5  
6 2 cachexia: overlap of clinical features. *Curr Opin Clin Nutr Metab Care*. 2012;15(3):213-  
7  
8  
9 3 9.  
10  
11  
12 4 [33] Yeo HJ, Byun KS, Han J, et al. Prognostic significance of malnutrition for long-  
13  
14  
15 5 term mortality in community-acquired pneumonia: a propensity score matched analysis.  
16  
17 6 *Korean J Intern Med*. 2019;34(4): 841-849.  
18  
19  
20  
21 7 [34] Washio M, Kondo K, Fujisawa N, et al. Hypoalbuminemia, influenza vaccination  
22  
23 8 and other factors related to the development of pneumonia acquired outside hospitals  
24  
25 9 in southern Japan: A case-control study. *Geriatr Gerontol Int*. 2016;16(2): 223-229.  
26  
27  
28  
29  
30 10 [35] Laur CV, McNicholl T, Valaitis R, et al. Malnutrition or frailty? Overlap and  
31  
32 11 evidence gaps in the diagnosis and treatment of frailty and malnutrition. *Appl Physiol*  
33  
34 12 *Nutr Metab*. 2017;42(5):449-58.  
35  
36  
37  
38 13 [36] Wesemann T, Nullmann H, Pflug MA, et al. Pneumonia severity, comorbidity and  
39  
40 14 1-year mortality in predominantly older adults with community-acquired pneumonia: a  
41  
42 15 cohort study. *BMC Infect Dis*. 2015;15:2.  
43  
44  
45  
46  
47 16 [37] Schoevaerdts D, Sibille FX, Gavazzi G. Infections in the older population: what do  
48  
49 17 we know? *Aging Clin Exp Res*. 2019 Oct 26.  
50  
51  
52  
53 18 [38] Choi JY, Kim SW, Yoon SJ et al. Impact of frailty on do-not-resuscitate orders and  
54  
55 19 healthcare transitions among elderly Koreans with pneumonia. *Clin Interv Aging*.  
56  
57 20 2018;1(13):2237-2245.  
58  
59  
60

- 1  
2  
3  
4 1 [39] Gonzalez-Castillo J, Martin-Sanchez FJ, Llinares P, Menendez R, Mujal A, Navas  
5  
6  
7 2 E, et al. Guidelines for the management of community-acquired pneumonia in the  
8  
9 3 elderly patient. *Rev Esp Quimioter*. 2014;27(1):69-86.  
10  
11  
12 4 [40] Rubenstein LZ, Stuck AE, Siu AL, et al. Impacts of geriatric evaluation and  
13  
14  
15 5 management programs on defined outcomes: overview of the evidence. *J Am Geriatr*  
16  
17 6 *Soc*. 1991;39(9 Pt 2):8S-16S; discussion 7S-8S.  
18  
19  
20  
21 7 [41] Hoogendijk EO, Afilalo J, Ensrud KE, et al. Frailty: implications for clinical practice  
22  
23  
24 8 and public health. *Lancet*. 2019;394(10206):1365-75.  
25  
26  
27  
28  
29  
30  
31  
32  
33  
34  
35  
36  
37  
38  
39  
40  
41  
42  
43  
44  
45  
46  
47  
48  
49  
50  
51  
52  
53  
54  
55  
56  
57  
58  
59  
60

1 Table 1. Baseline characteristics of the study population according to frailty status.

| Characteristics                         | Total cohort        | Non-frail           | Frail†              | P-values |
|-----------------------------------------|---------------------|---------------------|---------------------|----------|
| N (%)                                   | 256                 | 85 (33.2)           | 171 (66.8)          |          |
| Age, median (IQR)                       | 86 (81, 90)         | 83 (75, 87)         | 88 (84, 91)         | <0.001*  |
| Sex, n (%)                              |                     |                     |                     |          |
| Female                                  | 76 (29.7)           | 17 (20.0)           | 59 (34.5)           | 0.017*   |
| Male                                    | 180 (70.3)          | 68 (80.0)           | 112 (65.5)          |          |
| Smoking status, n (%)                   |                     |                     |                     |          |
| Current                                 | 29 (11.3)           | 11 (12.9)           | 18 (10.5)           | 0.288    |
| Previous                                | 71 (27.7)           | 28 (32.9)           | 43 (25.1)           |          |
| Never                                   | 156 (60.9)          | 46 (54.1)           | 110 (64.3)          |          |
| BMI (kg/m <sup>2</sup> ), mean (SD)     | 22.9 (4.3)          | 24.2 (3.8)          | 22.3 (4.4)          | 0.001*   |
| Barthel Index, median (IQR)             | 65 (40, 95)         | 95 (85, 100)        | 50 (20, 70)         | <0.001*  |
| CCI, median (IQR)                       | 4 (3, 5)            | 3 (2, 4)            | 4 (3, 6)            | <0.001*  |
| MNA-SF, median (IQR)                    | 10 (7, 12)          | 12 (11, 14)         | 9 (7, 11)           | <0.001*  |
| Malnutrition, n (%) <sup>§</sup>        | 71 (27.7)           | 6 (7.1)             | 65 (38.0)           |          |
| SCAP‡, n (%)                            | 57 (22.3)           | 8 (9.41)            | 49 (28.65)          | <0.001*  |
| PCT (ng/mL), median (IQR)               | 0.28 (0.21, 0.44)   | 0.27 (0.20, 0.37)   | 0.29 (0.21, 0.55)   | 0.149    |
| hs-CRP (mg/L), median (IQR)             | 25.89 (5.79, 61.41) | 19.63 (4.19, 54.29) | 27.08 (7.56, 62.43) | 0.129    |
| WBC (*10 <sup>9</sup> /L), median (IQR) | 7.65 (5.57, 11.06)  | 7.02 (5.64, 9.01)   | 8.02 (5.51, 12.33)  | 0.043*   |
| HGB (g/L), median (IQR)                 | 121 (108, 133)      | 127 (120, 136)      | 115 (100, 128)      | <0.001*  |

|                                         |                   |                   |                    |         |
|-----------------------------------------|-------------------|-------------------|--------------------|---------|
| Scr ( $\mu\text{mol/L}$ ), median (IQR) | 76.9 (61.6, 96.8) | 78.6 (67.4, 90.5) | 75.2 (59.5, 101.6) | 0.720   |
| BUN (mmol/L), median (IQR)              | 5.98 (4.58, 7.94) | 5.99 (4.30, 7.01) | 5.98 (4.79, 8.65)  | 0.039*  |
| ALT (U/L), median (IQR)                 | 14 (10, 22)       | 15 (11, 22)       | 13 (10, 21)        | 0.058   |
| ALB (g/L), mean (SD)                    | 32.46 (4.39)      | 34.38 (4.22)      | 31.50 (4.16)       | <0.001* |
| PA (g/L), mean (SD)                     | 16.92 (6.19)      | 18.74 (6.41)      | 15.98 (5.88)       | 0.001*  |
| 30-day mortality, n (%)                 | 14 (5.5)          | 0 (0)             | 14 (8.19)          | 0.015*  |
| 1-year mortality, n (%)                 | 43 (16.8)         | 0 (0)             | 43 (25.15)         | <0.001* |

Abbreviations: SD, standard deviation; IQR, inter-quartile range; BMI, body mass index; CCI, Charlson's Comorbidity Index; MNA-SF, Mini Nutritional Assessment-Short Form; SCAP, severe community-acquired pneumonia; PCT, procalcitonin; hs-CRP, high sensitivity C-reactive protein; WBC, white blood cell count; HGB, hemoglobin; BUN, blood urea nitrogen; Scr, serum creatinine; ALT, alanine aminotransferase; ALB, albumin; PA, prealbumin.

\*  $P < 0.05$ .

† Frailty was defined as Fried Phenotype scores  $\geq 3$ .

‡ SCAP was defined by IDSA/ATS criteria (2007).

§ Malnutrition was defined as MNA-SF scores  $\leq 7$ .

1 Table 2. Factors associated with 30-day and 1-year mortality in patients with  
 2 community-acquired pneumonia in Cox proportional hazards regression analyses  
 3 (n=256).

| Variable                | Univariate |             |         | Multivariate |             |         |
|-------------------------|------------|-------------|---------|--------------|-------------|---------|
|                         | HR         | 95% CI      | P-Value | HR           | 95% CI      | P-Value |
| <b>30-day mortality</b> |            |             |         |              |             |         |
| SCAP                    | 52.01      | 6.80-398.09 | <0.001  | 30.60        | 3.77-248.06 | 0.001*  |
| BI                      | 0.99       | 0.97-1.00   | 0.101   | –            | –           | –       |
| BMI                     | 0.97       | 0.86-1.09   | 0.609   | –            | –           | –       |
| Malnutrition            | 0.84       | 0.73-0.97   | 0.015   | 1.11         | 0.90-1.35   | 0.330   |
| Frailty                 | 2.58       | 1.42-4.69   | 0.002   | 1.83         | 0.88-3.81   | 0.108   |
| CCI                     | 1.41       | 1.19-1.67   | <0.001  | 1.19         | 0.99-1.43   | 0.069   |
| <b>1-year mortality</b> |            |             |         |              |             |         |
| SCAP                    | 13.32      | 6.81-26.04  | <0.001  | 7.68         | 3.79-15.58  | <0.001* |
| BI                      | 0.98       | 0.97-0.99   | <0.001  | 1.01         | 0.99-1.02   | 0.352   |
| BMI                     | 0.93       | 0.87-1.00   | 0.038   | 1.07         | 0.98-1.16   | 0.128   |
| Malnutrition            | 0.78       | 0.72-0.85   | <0.001  | 0.94         | 0.81-1.10   | 0.424   |
| Frailty                 | 3.41       | 2.32-5.03   | <0.001  | 2.70         | 1.69-4.39   | <0.001* |
| CCI                     | 1.40       | 1.26-1.55   | <0.001  | 1.19         | 1.05-1.34   | <0.001* |

4 Data are estimated hazard ratios and 95% confidence intervals of the explanatory  
 5 variables in the 30-day and 1-year mortality group. Data were adjusted for age, sex,  
 6 disability, malnutrition, comorbidities, and the severity of CAP.

7 Abbreviations: HR, hazards ratio; CI, confidence interval; SCAP, severe community-  
 8 acquired pneumonia; BI, Barthel Index; BMI, body mass index; CCI, Charlson's  
 9 Comorbidity Index.

10 \*P < 0.05.

11

1  
2  
3  
4 1 Table 3. Factors associated with 30-day and 1-year mortality in patients with severe  
5  
6 2 community-acquired pneumonia in Cox proportional hazards regression analyses  
7  
8 3 (n=57).  
9

| Variable                | Univariate |              |         | Multivariate |           |         |
|-------------------------|------------|--------------|---------|--------------|-----------|---------|
|                         | HR         | 95% CI       | P-Value | HR           | 95% CI    | P-Value |
| <b>30-day mortality</b> |            |              |         |              |           |         |
| BI                      | 1.00       | 0.99-1.02    | 0.899   | –            | –         | –       |
| BMI                     | 1.04       | 0.92-1.18    | 0.507   | –            | –         | –       |
| Malnutrition            | 0.73       | 0.24-2.23    | 0.581   | –            | –         | –       |
| Frailty                 | 26.61      | 0.04-16017.0 | 0.315   | –            | –         | –       |
| CCI                     | 1.21       | 1.02–1.43    | 0.028   | 1.21         | 1.02-1.43 | 0.028*  |
| <b>1-year mortality</b> |            |              |         |              |           |         |
| BI                      | 0.99       | 0.98–1.00    | 0.046   | 1.00         | 0.99–1.02 | 0.875   |
| BMI                     | 0.99       | 0.92-1.08    | 0.854   | –            | –         | –       |
| Malnutrition            | 0.86       | 0.77–0.97    | 0.010   | 1.05         | 0.89–1.25 | 0.545   |
| Frailty                 | 2.82       | 1.70–4.68    | <0.001  | 2.87         | 1.58–4.96 | <0.001* |
| CCI                     | 1.24       | 1.10–1.40    | 0.001   | 1.16         | 1.01–1.34 | 0.034*  |

43 4 Data are estimated hazard ratios and 95% confidence intervals of the explanatory  
44 5 variables in the 1-year mortality group. Data were adjusted for age, sex, disability,  
45 6 malnutrition, and comorbidities.

48 7 Abbreviations: HR, hazards ratio; CI, confidence interval; SCAP, severe community-  
49 8 acquired pneumonia; BI, Barthel Index; CCI, Charlson's Comorbidity Index.

51 9

52 10 \* P < 0.05.

54 11

55 12

56 13

57 14

58 15

59 15

60

1  
2  
3  
4 1 Figure legend:

5  
6 2 Figure1: Flowchart of patients excluded/included for the frailty assessment analyses

7  
8 3 in community-acquired pneumonia cohort.

9  
10 4  
11  
12  
13  
14  
15  
16  
17  
18  
19  
20  
21  
22  
23  
24  
25  
26  
27  
28  
29  
30  
31  
32  
33  
34  
35  
36  
37  
38  
39  
40  
41  
42  
43  
44  
45  
46  
47  
48  
49  
50  
51  
52  
53  
54  
55  
56  
57  
58  
59  
60

For peer review only

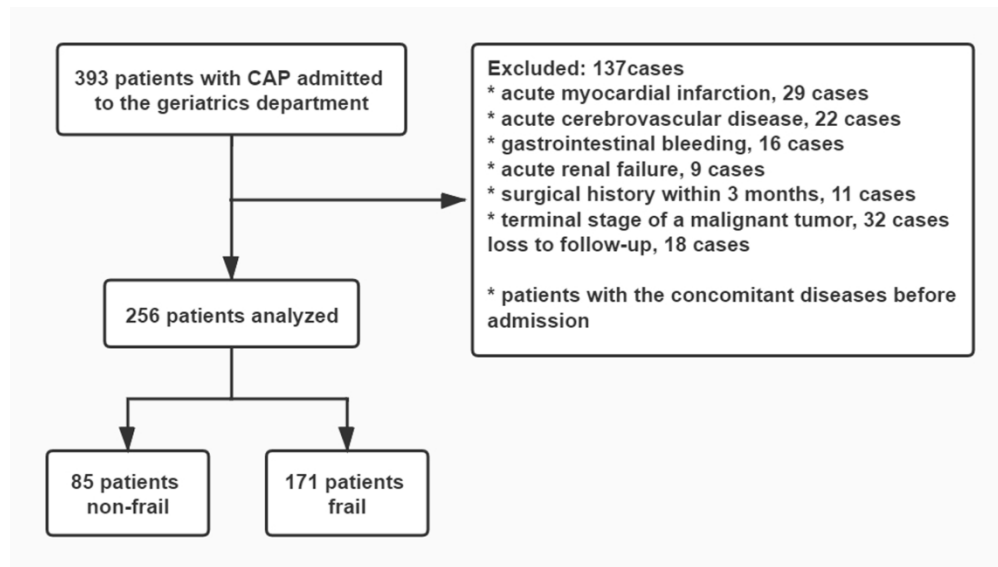

Figure1: Flowchart of patients excluded/included for the frailty assessment analyses in community-acquired pneumonia cohort.



Supplementary Table. Characteristics of patients with severe community-acquired pneumonia<sup>‡</sup> stratified by frailty status.

| Characteristics                      | Non-frail           | Frail <sup>†</sup>  | P-values |
|--------------------------------------|---------------------|---------------------|----------|
| N, n (%)                             | 8 (14.0)            | 49 (86.0)           |          |
| Age, median (IQR)                    | 85 (82–91)          | 89 (81–92)          | 0.581    |
| Sex, n (%)                           |                     |                     |          |
| Female                               | 0 (0)               | 11 (22.5)           | 0.053    |
| Male                                 | 8 (100)             | 38 (77.6)           |          |
| BMI (kg/m <sup>2</sup> ), mean (SD)  | 22.95 (2.56)        | 21.59 (4.81)        | 0.249    |
| Barthel Index, median (IQR)          | 88 (59–99)          | 35 (8–68)           | 0.001*   |
| CCI, median (IQR)                    | 4 (2–5)             | 5 (3–8)             | 0.129    |
| MNA-SF, mean (SD)                    | 11 (3)              | 7 (3)               | 0.003*   |
| PCT (ng/mL), median (IQR)            | 0.30 (0.21–0.40)    | 0.31 (0.23–1.74)    | 0.477    |
| hs-CRP (mg/L), median (IQR)          | 33.52 (3.65–154.94) | 34.42 (19.08–89.78) | 0.928    |
| WBC (*10 <sup>9</sup> /L), mean (SD) | 8.45 (2.53)         | 10.83 (5.27)        | 0.218    |
| HGB (g/L), median (IQR)              | 122 (106–146)       | 114 (93–123)        | 0.179    |
| Scr (μmol/L), median (IQR)           | 103.5 (88.5–121.1)  | 82.6 (62.1–114.8)   | 0.161    |
| BUN (mmol/L), median (IQR)           | 8.35 (6.86–9.49)    | 7.98 (5.67–12.07)   | 0.730    |
| ALT (U/L), median (IQR)              | 16 (10–27)          | 13 (10–20)          | 0.557    |
| ALB (g/L), median (IQR)              | 33.10 (31.75–34.38) | 30.00 (27.35–32.85) | 0.039*   |
| PA (g/L), mean (SD)                  | 18.56 (9.60)        | 14.44 (5.85)        | 0.118    |
| 30-day mortality, n (%)              | 0 (0)               | 13 (26.53)          | 0.034*   |
| 1-year mortality, n (%)              | 0 (0)               | 31 (63.27)          | <0.001*  |

Abbreviations: SD, standard deviation; IQR, inter-quartile range; BMI, body mass index; CCI, Charlson's Comorbidity Index; MNA-SF, Mini Nutritional

1  
2  
3 Assessment-Short Form; PCT, procalcitonin; hs-CRP, high-sensitivity C-reactive  
4 protein; WBC, white blood cell count; HGB, hemoglobin; BUN, blood urea nitrogen;  
5 Scr, serum creatinine; ALT, alanine aminotransferase; ALB, albumin; PA, prealbumin.  
6  
7

8 \* P < 0.05.  
9

10 † Frailty was defined as Fried Phenotype scores  $\geq 3$ .  
11

12 ‡ Defined by IDSA/ATS criteria (2007).  
13  
14  
15  
16  
17  
18  
19  
20  
21  
22  
23  
24  
25  
26  
27  
28  
29  
30  
31  
32  
33  
34  
35  
36  
37  
38  
39  
40  
41  
42  
43  
44  
45  
46  
47  
48  
49  
50  
51  
52  
53  
54  
55  
56  
57  
58  
59  
60

For peer review only
