# Supplementary material for: Impact of frailty on 30-day and 1-year mortality in hospitalised elderly patients with community-acquired pneumonia: a prospective observational study
Source: PubMed Central journal article supplement — BMJ Open. 2020 Oct 31;10(10):e038370. doi: 10.1136/bmjopen-2020-038370 (PMC7783614; doi:10.1136/bmjopen-2020-038370), 2020-10-31
Supplement: bmjopen-2020-038370supp001.pdf [file bmjopen-2020-038370supp001.pdf]

Supplementary Table. Characteristics of patients with severe community-acquired pneumonia<sup>‡</sup> stratified by frailty status.

| Characteristics                      | Non-frail           | Frail <sup>†</sup>  | P-values |
|--------------------------------------|---------------------|---------------------|----------|
| N, n (%)                             | 8 (14.0)            | 49 (86.0)           |          |
| Age, median (IQR)                    | 85 (82–91)          | 89 (81–92)          | 0.581    |
| Sex, n (%)                           |                     |                     |          |
| Female                               | 0 (0)               | 11 (22.5)           | 0.053    |
| Male                                 | 8 (100)             | 38 (77.6)           |          |
| BMI (kg/m <sup>2</sup> ), mean (SD)  | 22.95 (2.56)        | 21.59 (4.81)        | 0.249    |
| Barthel Index, median (IQR)          | 88 (59–99)          | 35 (8–68)           | 0.001*   |
| CCI, median (IQR)                    | 4 (2–5)             | 5 (3–8)             | 0.129    |
| MNA-SF, mean (SD)                    | 11 (3)              | 7 (3)               | 0.003*   |
| PCT (ng/mL), median (IQR)            | 0.30 (0.21–0.40)    | 0.31 (0.23–1.74)    | 0.477    |
| hs-CRP (mg/L), median (IQR)          | 33.52 (3.65–154.94) | 34.42 (19.08–89.78) | 0.928    |
| WBC (*10 <sup>9</sup> /L), mean (SD) | 8.45 (2.53)         | 10.83 (5.27)        | 0.218    |
| HGB (g/L), median (IQR)              | 122 (106–146)       | 114 (93–123)        | 0.179    |
| Scr (μmol/L), median (IQR)           | 103.5 (88.5–121.1)  | 82.6 (62.1–114.8)   | 0.161    |
| BUN (mmol/L), median (IQR)           | 8.35 (6.86–9.49)    | 7.98 (5.67–12.07)   | 0.730    |
| ALT (U/L), median (IQR)              | 16 (10–27)          | 13 (10–20)          | 0.557    |
| ALB (g/L), median (IQR)              | 33.10 (31.75–34.38) | 30.00 (27.35–32.85) | 0.039*   |
| PA (g/L), mean (SD)                  | 18.56 (9.60)        | 14.44 (5.85)        | 0.118    |
| 30-day mortality, n (%)              | 0 (0)               | 13 (26.53)          | 0.034*   |
| 1-year mortality, n (%)              | 0 (0)               | 31 (63.27)          | <0.001*  |

Abbreviations: SD, standard deviation; IQR, inter-quartile range; BMI, body mass index; CCI, Charlson's Comorbidity Index; MNA-SF, Mini Nutritional

Assessment-Short Form; PCT, procalcitonin; hs-CRP, high-sensitivity C-reactive protein; WBC, white blood cell count; HGB, hemoglobin; BUN, blood urea nitrogen; Scr, serum creatinine; ALT, alanine aminotransferase; ALB, albumin; PA, prealbumin.

\*  $P < 0.05$ .

† Frailty was defined as Fried Phenotype scores  $\geq 3$ .

‡ Defined by IDSA/ATS criteria (2007).
